# Supplementary material
Source: publisher figshare collection journal article supplement (https://acs.figshare.com/ndownloader/files/4013785)
Supplement: Supplementary file 1 [file 4013785]

## Sheet: parents.txt
Source ID	SMILES	Name	Compound Class	MIMW	CLogP
DB01108	CC12CCC3C(CCC45OC4C(O)=C(CC35C)C#N)C1CCC2O	Trilostane	Drugs	329.199	2.335
DB01120	CC1=CC=C(C=C1)S(=O)(=O)NC(=O)NN1CC2CCCC2C1	Gliclazide	Drugs	323.13	1.093
DB01219	[O-][N+](=O)C1=CC=C(C=C1)C1=CC=C(O1)C=NN1CC(=O)NC1=O	Dantrolene	Drugs	314.065	1.631
DB01121	NC(=O)NC(=O)CC1=CC=CC=C1	Phenacemide	Drugs	178.074	0.874
DB01123	NC1=CC2=NC3=C(C=CC(N)=C3)C=C2C=C1	Proflavine	Drugs	209.095	2.309
DB01124	CCCCNC(=O)NS(=O)(=O)C1=CC=C(C)C=C1	Tolbutamide	Drugs	270.104	2.497
DB01125	COC1=CC=C(C=C1)C1C(=O)C2=CC=CC=C2C1=O	Anisindione	Drugs	252.079	2.729
DB01126	CC12CCC3C(CCC4NC(=O)C=CC34C)C1CCC2C(=O)NC1=C(C=CC(=C1)C(F)(F)F)C(F)(F)F	Dutasteride	Drugs	528.221	4.94
DB01127	ClC1=CC=C(COC(CN2C=CN=C2)C2=C(Cl)C=C(Cl)C=C2)C=C1	Econazole	Drugs	380.025	5.099
DB01128	CC(O)(CS(=O)(=O)C1=CC=C(F)C=C1)C(=O)NC1=CC(=C(C=C1)C#N)C(F)(F)F	Bicalutamide	Drugs	430.061	2.707
DB01129	COCCCOC1=C(C)C(CS(=O)C2=NC3=CC=CC=C3N2)=NC=C1	Rabeprazole	Drugs	359.13	2.078
DB01130	CCOC(=O)OC1(CCC2C3CCC4=CC(=O)C=CC4(C)C3C(O)CC12C)C(=O)COC(=O)CC	Prednicarbate	Drugs	488.241	3.501
DB01110	ClC1=CC(Cl)=C(COC(CN2C=CN=C2)C2=C(Cl)C=C(Cl)C=C2)C=C1	Miconazole	Drugs	413.986	5.812
DB01131	CC(C)N=C(N)N=C(N)NC1=CC=C(Cl)C=C1	Proguanil	Drugs	253.109	1.16
DB01132	CCC1=CN=C(CCOC2=CC=C(CC3SC(=O)NC3=O)C=C2)C=C1	Pioglitazone	Drugs	356.119	3.533
DB01133	OP(O)(=O)C(SC1=CC=C(Cl)C=C1)P(O)(O)=O	Tiludronate	Drugs	317.928	0.258
DB01134	CC(C)(C)C(=O)OCC(=O)C1CCC2C3CCC4=CC(=O)CCC4(C)C3CCC12C	Desoxycorticosterone Pivalate	Drugs	414.277	5.214
DB01136	COC1=CC=CC=C1OCCNCC(O)COC1=CC=CC2=C1C1=CC=CC=C1N2	Carvedilol	Drugs	406.189	4.041
DB01137	CC1COC2=C3N1C=C(C(O)=O)C(=O)C3=CC(F)=C2N1CCN(C)CC1	Levofloxacin	Drugs	361.144	-0.508
DB01138	O=C1C(CCS(=O)C2=CC=CC=C2)C(=O)N(N1C1=CC=CC=C1)C1=CC=CC=C1	Sulfinpyrazone	Drugs	404.119	1.655
DB01139	CC(=O)OCC1=C(N2C(SC1)C(NC(=O)CSC1=CC=NC=C1)C2=O)C(O)=O	Cephapirin	Drugs	423.056	-0.614
DB01140	CC1=C(N2C(SC1)C(NC(=O)C(N)C1=CC=C(O)C=C1)C2=O)C(O)=O	Cefadroxil	Drugs	363.089	-2.507
DB01141	CCCCCOC1=CC=C(C=C1)C1=CC(=NO1)C1=CC=C(C=C1)C(=O)NC1CC(O)C(O)NC(=O)C2C(O)C(C)CN2C(=O)C(NC(=O)C(NC(=O)C2CC(O)CN2C(=O)C(NC1=O)C(C)O)C(O)C(O)C1=CC(OS(O)(=O)=O)=C(O)C=C1)C(O)CC(N)=O	Micafungin	Drugs	1269.44	-2.595
DB01112	CON=C(C(=O)NC1C2SCC(COC(N)=O)=C(N2C1=O)C(O)=O)C1=CC=CO1	Cefuroxime	Drugs	424.069	0.229
DB01142	CN(C)CCC=C1C2=CC=CC=C2COC2=CC=CC=C12	Doxepin	Drugs	279.162	4.092
DB01143	NCCCNCCSP(O)(O)=O	Amifostine	Drugs	214.054	-1.846
DB01144	NS(=O)(=O)C1=CC(=C(Cl)C(Cl)=C1)S(N)(=O)=O	Dichlorphenamide	Drugs	303.915	0.241
DB01145	OS(=O)CNC1=CC=C(C=C1)S(=O)(=O)C1=CC=C(NCS(O)=O)C=C1	Sulfoxone	Drugs	404.017	-1.212
DB01146	CN1CCC(CC1)OC(C1=CC=CC=C1)C1=CC=CC=C1	Diphenylpyraline	Drugs	281.178	3.206
DB01147	CC1=C(C(=O)NC2C3SC(C)(C)C(N3C2=O)C(O)=O)C(=NO1)C1=CC=CC=C1Cl	Cloxacillin	Drugs	435.066	2.516
DB01148	CC1=C(OC2=C(C=CC=C2C(=O)OCCN2CCCCC2)C1=O)C1=CC=CC=C1	Flavoxate	Drugs	391.178	4.97
DB01149	CCC1=NN(CCCN2CCN(CC2)C2=CC(Cl)=CC=C2)C(=O)N1CCOC1=CC=CC=C1	Nefazodone	Drugs	469.224	5.725
DB01150	CC=CC1=C(N2C(SC1)C(NC(=O)C(N)C1=CC=C(O)C=C1)C2=O)C(O)=O	Cefprozil	Drugs	389.105	-1.873
DB01151	CNCCCN1C2=CC=CC=C2CCC2=CC=CC=C12	Desipramine	Drugs	266.178	4.468
DB01113	COC1=C(OC)C=C(CC2=NC=CC3=CC(OC)=C(OC)C=C23)C=C1	Papaverine	Drugs	339.147	3.782
DB01152	CC(CC(C)C1OC(=O)CC(=O)CCCC(=O)CC(O)CC(O)CC(O)CC2(O)CC(O)C(C(CC(OC3OC(C)C(O)C(N)C3O)C=CC=CC=CC=CC=CC=CC=CC1C)O2)C(O)=O)C(O)CC(=O)C1=CC=C(N)C=C1	Candicidin	Drugs	1108.57	-1.458
DB01153	ClC1=CC(Cl)=C(C=C1)C(CN1C=CN=C1)OCC1=CSC2=C1C=CC=C2Cl	Sertaconazole	Drugs	435.997	6.16
DB01154	CCCC(C)C1(CC=C)C(=O)NC(=S)NC1=O	Thiamylal	Drugs	254.109	3.027
DB01155	CON=C1CN(CC1CN)C1=C(F)C=C2C(=O)C(=CN(C3CC3)C2=N1)C(O)=O	Gemifloxacin	Drugs	389.15	-1.245
DB01156	CC(NC(C)(C)C)C(=O)C1=CC(Cl)=CC=C1	Bupropion	Drugs	239.108	3.211
DB01157	COC1=CC(NCC2=C(C)C3=C(C=C2)N=C(N)N=C3N)=CC(OC)=C1OC	Trimetrexate	Drugs	369.18	1.844
DB01159	FC(F)(F)C(Cl)Br	Halothane	Drugs	195.89	2.272
DB01161	CCN(CC)CCOC(=O)C1=C(Cl)C=C(N)C=C1	Chloroprocaine	Drugs	270.114	2.909
DB01162	COC1=C(OC)C=C2C(N)=NC(=NC2=C1)N1CCN(CC1)C(=O)C1CCCO1	Terazosin	Drugs	387.191	2.182
DB01163	CC1(C)SC2C(N=CN3CCCCCC3)C(=O)N2C1C(O)=O	Amdinocillin	Drugs	325.146	2.504
DB01114	CN(C)CCC(C1=CC=C(Cl)C=C1)C1=CC=CC=N1	Chlorpheniramine	Drugs	274.124	3.148
DB01166	O=C1CCC2=C(N1)C=CC(OCCCCC1=NN=NN1C1CCCCC1)=C2	Cilostazol	Drugs	369.216	3.528
DB01167	CCC(C)N1N=CN(C1=O)C1=CC=C(C=C1)N1CCN(CC1)C1=CC=C(OCC2COC(CN3C=NC=N3)(O2)C2=C(Cl)C=C(Cl)C=C2)C=C1	Itraconazole	Drugs	704.239	5.99
DB01168	CNNCC1=CC=C(C=C1)C(=O)NC(C)C	Procarbazine	Drugs	221.153	-0.083
DB01169	O1[As]2O[As]1O2	Arsenic trioxide	Drugs	197.828	5.574
DB01170	NC(N)=NCCN1CCCCCCC1	Guanethidine	Drugs	198.184	1.339
DB01171	ClC1=CC=C(C=C1)C(=O)NCCN1CCOCC1	Moclobemide	Drugs	268.098	2.171
DB01172	NCC1OC(OC2C(N)CC(N)C(OC3OC(CO)C(O)C(N)C3O)C2O)C(O)C(O)C1O	Kanamycin	Drugs	484.238	-5.173
DB01173	CN(C)CCOC(C1=CC=CC=C1)C1=CC=CC=C1C	Orphenadrine	Drugs	269.178	3.901
DB01174	CCC1(C(=O)NC(=O)NC1=O)C1=CC=CC=C1	Phenobarbital	Drugs	232.085	1.365
DB01176	CN1CCN(CC1)C(C1=CC=CC=C1)C1=CC=CC=C1	Cyclizine	Drugs	266.178	3.798
DB01115	COC(=O)C1=C(C)NC(C)=C(C1C1=CC=CC=C1[N+]([O-])=O)C(=O)OC	Nifedipine	Drugs	346.116	3.125
DB01177	CC1OC(CC(N)C1O)OC1CC(O)(CC2=C1C(O)=C1C(=O)C3=CC=CC=C3C(=O)C1=C2O)C(C)=O	Idarubicin	Drugs	497.169	0.904
DB01178	CN1C(C2=CC=C(Cl)C=C2)S(=O)(=O)CCC1=O	Chlormezanone	Drugs	273.023	1.575
DB01179	COC1=CC(=CC(OC)=C1OC)C1C2C(COC2=O)C(O)C2=CC3=C(OCO3)C=C12	Podofilox	Drugs	414.131	1.444
DB01180	COC1C(CC2CN3CCC4=C(NC5=C4C=CC(OC)=C5)C3CC2C1C(=O)OC)OC(=O)C=CC1=CC(OC)=C(OC)C(OC)=C1	Rescinnamine	Drugs	634.289	4.12
DB01181	ClCCNP1(=O)OCCCN1CCCl	Ifosfamide	Drugs	260.025	0.923
DB01182	CCCNCC(O)COC1=CC=CC=C1C(=O)CCC1=CC=CC=C1	Propafenone	Drugs	341.199	3.636
DB01183	OC1=C2OC3C(=O)CCC4(O)C5CC(C=C1)=C2C34CCN5CC=C	Naloxone	Drugs	327.147	0.159
DB01184	ClC1=CC2=C(C=C1)N(C1CCN(CCCN3C(=O)NC4=CC=CC=C34)CC1)C(=O)N2	Domperidone	Drugs	425.162	4.268
DB01185	CC1(O)CCC2C3CCC4=CC(=O)CCC4(C)C3(F)C(O)CC12C	Fluoxymesterone	Drugs	336.21	2.844
DB01186	CCCN1CC(CSC)CC2C1CC1=CNC3=CC=CC2=C13	Pergolide	Drugs	314.182	4.398
DB01117	OC1=C(C2CCC(CC2)C2=CC=C(Cl)C=C2)C(=O)C2=CC=CC=C2C1=O	Atovaquone	Drugs	366.102	6.351
DB01187	CCOC(=O)CCCCCCCCC(C)C1=CC=CC=C1I	Iophendylate	Drugs	416.121	7.583
DB01188	CC1=CC(=O)N(O)C(=C1)C1CCCCC1	Ciclopirox	Drugs	207.126	2.027
DB01189	FC(F)OC(F)C(F)(F)F	Desflurane	Drugs	168.001	1.324
DB01190	CCCC1CC(N(C)C1)C(=O)NC(C(C)Cl)C1OC(SC)C(O)C(O)C1O	Clindamycin	Drugs	424.18	2.569
DB01191	CCNC(C)CC1=CC(=CC=C1)C(F)(F)F	Dexfenfluramine	Drugs	231.123	3.3
DB01192	CN1CCC23C4OC5=C(O)C=CC(CC1C2(O)CCC4=O)=C35	Oxymorphone	Drugs	301.131	-0.484
DB01193	CCCC(=O)NC1=CC(C(C)=O)=C(OCC(O)CNC(C)C)C=C1	Acebutolol	Drugs	336.205	1.71
DB01194	CCNC1CN(CCCOC)S(=O)(=O)C2=C1C=C(S2)S(N)(=O)=O	Brinzolamide	Drugs	383.064	0.334
DB01195	FC(F)(F)COC1=CC(C(=O)NCC2CCCCN2)=C(OCC(F)(F)F)C=C1	Flecainide	Drugs	414.138	3.66
DB01196	CC12CCC3C(CCC4=C3C=CC(OC(=O)N(CCCl)CCCl)=C4)C1CCC2O	Estramustine	Drugs	439.168	4.92
DB01118	CCCCC1=C(C(=O)C2=CC(I)=C(OCCN(CC)CC)C(I)=C2)C2=CC=CC=C2O1	Amiodarone	Drugs	645.024	8.945
DB01197	CC(CS)C(=O)N1CCCC1C(O)=O	Captopril	Drugs	217.077	0.89
DB01200	CC(C)CC1N2C(=O)C(NC(=O)C3CN(C)C4CC5=C(Br)NC6=CC=CC(=C56)C4=C3)(OC2(O)C2CCCN2C1=O)C(C)C	Bromocriptine	Drugs	653.221	6.585
DB01201	COC1C=COC2(C)OC3=C(C2=O)C2=C(C(O)=C3C)C(O)=C(NC(=O)C(C)=CC=CC(C)C(O)C(C)C(O)C(C)C(OC(C)=O)C1C)C(C=NN1CCN(CC1)C1CCCC1)=C2O	Rifapentine	Drugs	876.452	5.092
DB01202	CCC(N1CCCC1=O)C(N)=O	Levetiracetam	Drugs	170.106	-0.344
DB01203	CC(C)(C)NCC(O)COC1=CC=CC2=C1CC(O)C(O)C2	Nadolol	Drugs	309.194	0.379
DB01204	OCCNCCNC1=C2C(=O)C3=C(O)C=CC(O)=C3C(=O)C2=C(NCCNCCO)C=C1	Mitoxantrone	Drugs	444.201	2.299
DB01205	CCOC(=O)C1=C2CN(C)C(=O)C3=C(C=CC(F)=C3)N2C=N1	Flumazenil	Drugs	303.102	1.291
DB01206	ClCCN(N=O)C(=O)NC1CCCCC1	Lomustine	Drugs	233.093	2.755
DB01207	OC(=O)CCCCON=C(C1=CN=CC=C1)C1=CC(=CC=C1)C(F)(F)F	Ridogrel	Drugs	366.119	4.538
DB01208	CC1CN(CC(C)N1)C1=C(F)C(N)=C2C(=O)C(=CN(C3CC3)C2=C1F)C(O)=O	Sparfloxacin	Drugs	392.166	-0.605
DB01119	CC1=NS(=O)(=O)C2=C(N1)C=CC(Cl)=C2	Diazoxide	Drugs	229.992	1.421
DB01209	CC12CCCCCC(CC3=C1C=C(O)C=C3)C2N	Dezocine	Drugs	245.178	3.72
DB01210	CC(C)(C)NCC(O)COC1=CC=CC2=C1CCCC2=O	Levobunolol	Drugs	291.183	2.262
DB01211	CCC1OC(=O)C(C)C(OC2CC(C)(OC)C(O)C(C)O2)C(C)C(OC2OC(C)CC(C2O)N(C)C)C(C)(CC(C)C(=O)C(C)C(O)C1(C)O)OC	Clarithromycin	Drugs	747.477	2.374
DB01212	CON=C(C(=O)NC1C2SCC(CSC3=NC(=O)C(=O)NN3C)=C(N2C1=O)C(O)=O)C1=CSC(N)=N1	Ceftriaxone	Drugs	554.046	0.02
DB01213	CC1=CNN=C1	Fomepizole	Drugs	82.0531	0.51
DB01214	CC(C)NCC(O)COC1=C(C)C(C)=C(OC(C)=O)C(C)=C1	Metipranolol	Drugs	309.194	2.545
DB01215	ClC1=CC2=C(C=C1)N1C=NN=C1CN=C2C1=CC=CC=C1	Estazolam	Drugs	294.067	2.286
DB01216	CC(C)(C)NC(=O)C1CCC2C3CCC4NC(=O)C=CC4(C)C3CCC12C	Finasteride	Drugs	372.278	3.013
DB01217	CC(C)(C#N)C1=CC(=CC(CN2C=NC=N2)=C1)C(C)(C)C#N	Anastrozole	Drugs	293.164	1.475
DB01218	CCCCN(CCCC)CCC(O)C1=C2C=CC(=CC2=C2C=C(Cl)C=C(Cl)C2=C1)C(F)(F)F	Halofantrine	Drugs	499.166	9.31
DB01220	COC1C=COC2(C)OC3=C(C)C(O)=C4C(O)=C(NC(=O)C(C)=CC=CC(C)C(O)C(C)C(O)C(C)C(OC(C)=O)C1C)C1=C(N=C5C=C(C)C=CN15)C4=C3C2=O	Rifaximin	Drugs	785.352	7.186
DB01233	CCN(CC)CCNC(=O)C1=CC(Cl)=C(N)C=C1OC	Metoclopramide	Drugs	299.14	2.229
DB01407	CC(C)(C)NCC(O)C1=CC(Cl)=C(N)C(Cl)=C1	Clenbuterol	Drugs	276.08	2.393
DB01235	NC(CC1=CC(O)=C(O)C=C1)C(O)=O	Levodopa	Drugs	197.069	-2.82
DB01236	FCOC(C(F)(F)F)C(F)(F)F	Sevoflurane	Drugs	200.007	1.451
DB01237	CN(C)CCOC(C1=CC=CC=C1)C1=CC=C(Br)C=C1	Bromodiphenhydramine	Drugs	333.073	4.315
DB01238	ClC1=CC=CC(N2CCN(CCCCOC3=CC4=C(CCC(=O)N4)C=C3)CC2)=C1Cl	Aripiprazole	Drugs	447.148	5.312
DB01239	CN(C)CCC=C1C2=CC=CC=C2SC2=C1C=C(Cl)C=C2	Chlorprothixene	Drugs	315.085	5.482
DB01240	CCCCCC(O)C=CC1C(O)CC2OC(CC12)=CCCCC(O)=O	Epoprostenol	Drugs	352.225	2.328
DB01241	CC1=CC(OCCCC(C)(C)C(O)=O)=C(C)C=C1	Gemfibrozil	Drugs	250.157	3.937
DB01242	CN(C)CCCN1C2=CC=CC=C2CCC2=C1C=C(Cl)C=C2	Clomipramine	Drugs	314.155	5.921
DB01243	OC1=C(Cl)C=C(Cl)C2=C1N=CC=C2	Chloroxine	Drugs	212.975	3.339
DB01221	CNC1(CCCCC1=O)C1=CC=CC=C1Cl	Ketamine	Drugs	237.092	2.932
DB01244	CC(C)COCC(CN(CC1=CC=CC=C1)C1=CC=CC=C1)N1CCCC1	Bepridil	Drugs	366.267	6.2
DB01246	CC(CN(C)C)CN1C2=CC=CC=C2SC2=CC=CC=C12	Trimeprazine	Drugs	298.15	4.798
DB01247	CC1=CC(=NO1)C(=O)NNCC1=CC=CC=C1	Isocarboxazid	Drugs	231.101	0.994
DB01248	CC(=O)OC12COC1CC(O)C1(C)C2C(OC(=O)C2=CC=CC=C2)C2(O)CC(OC(=O)C(O)C(NC(=O)OC(C)(C)C)C3=CC=CC=C3)C(C)=C(C(O)C1=O)C2(C)C	Docetaxel	Drugs	807.347	4.084
DB01249	CC(=O)N(CC(O)CN(C(C)=O)C1=C(I)C(C(=O)NCC(O)CO)=C(I)C(C(=O)NCC(O)CO)=C1I)C1=C(I)C(C(=O)NCC(O)CO)=C(I)C(C(=O)NCC(O)CO)=C1I	Iodixanol	Drugs	1549.71	-4.278
DB01250	OC(=O)C1=CC(=CC=C1O)N=NC1=CC=C(O)C(=C1)C(O)=O	Olsalazine	Drugs	302.054	4.535
DB01251	COC1=CC2=C(C=C1)C(C)(C)C(=O)N(CCC1=CC=C(C=C1)S(=O)(=O)NC(=O)NC1CCCCC1)C2=O	Gliquidone	Drugs	527.209	5.058
DB01252	OC(=O)C(CC(=O)N1CC2CCCCC2C1)CC1=CC=CC=C1	Mitiglinide	Drugs	315.183	3.057
DB01253	CC(CO)NC(=O)C1CN(C)C2CC3=CNC4=CC=CC(=C34)C2=C1	Ergonovine	Drugs	325.179	1.229
DB01254	CC1=NC(NC2=NC=C(S2)C(=O)NC2=C(C)C=CC=C2Cl)=CC(=N1)N1CCN(CCO)CC1	Dasatinib	Drugs	487.156	2.529
DB01222	CCCC1OC2CC3C4CCC5=CC(=O)C=CC5(C)C4C(O)CC3(C)C2(O1)C(=O)CO	Budesonide	Drugs	430.236	2.905
DB01255	CC(CC1=CC=CC=C1)NC(=O)C(N)CCCCN	Lisdexamfetamine	Drugs	263.2	0.81
DB01256	CC1CCC23CCC(=O)C2C1(C)C(CC(C)(C=C)C(O)C3C)OC(=O)CSC1CC2CCC(C1)N2C	Retapamulin	Drugs	517.323	5.212
DB01258	COCCCOC1=C(OC)C=CC(CC(CC(N)C(O)CC(C(C)C)C(=O)NCC(C)(C)C(N)=O)C(C)C)=C1	Aliskiren	Drugs	551.393	3.514
DB01259	CS(=O)(=O)CCNCC1=CC=C(O1)C1=CC2=C(C=C1)N=CN=C2NC1=CC(Cl)=C(OCC2=CC(F)=CC=C2)C=C1	Lapatinib	Drugs	580.135	5.965
DB01260	CC1(C)OC2CC3C4CCC5=CC(=O)C=CC5(C)C4C(O)CC3(C)C2(O1)C(=O)CO	Desonide	Drugs	416.22	2.366
DB01261	NC(CC(=O)N1CCN2C(C1)=NN=C2C(F)(F)F)CC1=CC(F)=C(F)C=C1F	Sitagliptin	Drugs	407.118	0.691
DB01262	NC1=NC(=O)N(C=N1)C1CC(O)C(CO)O1	Decitabine	Drugs	228.086	-1.901
DB01263	CCC(C(C)O)N1N=CN(C1=O)C1=CC=C(C=C1)N1CCN(CC1)C1=CC=C(OCC2COC(CN3C=NC=N3)(C2)C2=C(F)C=C(F)C=C2)C=C1	Posaconazole	Drugs	700.33	4.113
DB01264	CC(C)CN(CC(O)C(CC1=CC=CC=C1)NC(=O)OC1COC2OCCC12)S(=O)(=O)C1=CC=C(N)C=C1	Darunavir	Drugs	547.235	2.887
DB01265	CC1=CN(C2CC(O)C(CO)O2)C(=O)NC1=O	Telbivudine	Drugs	242.09	-1.385
DB01224	OCCOCCN1CCN(CC1)C1=NC2=CC=CC=C2SC2=CC=CC=C12	Quetiapine	Drugs	383.167	2.992
DB01267	CC1=C(CCN2CCC(CC2)C2=NOC3=C2C=CC(F)=C3)C(=O)N2CCCC(O)C2=N1	Paliperidone	Drugs	426.207	1.074
DB01268	CCN(CC)CCNC(=O)C1=C(C)NC(C=C2C(=O)NC3=C2C=C(F)C=C3)=C1C	Sunitinib	Drugs	398.212	2.998
DB01273	C1C2CNCC1C1=CC3=NC=CN=C3C=C21	Varenicline	Drugs	211.111	0.899
DB01275	NNC1=NN=CC2=CC=CC=C12	Hydralazine	Drugs	160.075	1.173
DB01280	COC1=NC(N)=NC2=C1N=CN2C1OC(CO)C(O)C1O	Nelarabine	Drugs	297.107	-1.188
DB01282	CCC(C)C1NC(=O)C(CC2=CC=C(O)C=C2)N(C)C(=O)CCCSCC(NC(=O)C(CC(N)=O)NC(=O)C(CCC(N)=O)NC1=O)C(=O)N1CCCC1C(=O)NC(CC(C)C)C(=O)NCC(N)=O	Carbetocin	Drugs	987.485	-0.028
DB01283	CC1=CC(CC(O)=O)=C(NC2=C(F)C=CC=C2Cl)C=C1	Lumiracoxib	Drugs	293.062	4.655
DB01288	CC(CC1=CC=C(O)C=C1)NCC(O)C1=CC(O)=CC(O)=C1	Fenoterol	Drugs	303.147	0.984
DB01289	CC1=CC(=NO1)C(=O)NCCC1=CC=C(C=C1)S(=O)(=O)NC(=O)NN1CCCCCC1	Glisoxepide	Drugs	449.173	0.71
DB01291	CC(C)(C)NCC(O)C1=NC(CO)=C(O)C=C1	Pirbuterol	Drugs	240.147	-0.032
DB01227	CCC(OC(C)=O)C(CC(C)N(C)C)(C1=CC=CC=C1)C1=CC=CC=C1	Levomethadyl Acetate	Drugs	353.235	4.587
DB01294	O[Bi]1OC(=O)C2=CC=CC=C2O1	Bismuth Subsalicylate	Drugs	361.999	0.339
DB01295	COC1=C(OC)C=C(CCNCC(O)COC2=CC=CC(C)=C2)C=C1	Bevantolol	Drugs	345.194	2.995
DB01296	NC1C(O)OC(CO)C(O)C1O	Glucosamine	Drugs	179.079	-2.184
DB01297	CC(C)NCC(O)COC1=CC=C(NC(C)=O)C=C1	Practolol	Drugs	266.163	0.755
DB01298	CCN1C=CC(NS(=O)(=O)C2=CC=C(N)C=C2)=NC1=O	Sulfacytine	Drugs	294.079	-0.327
DB01299	COC1=NC=NC(NS(=O)(=O)C2=CC=C(N)C=C2)=C1OC	Sulfadoxine	Drugs	310.074	1.231
DB01301	CN(C)C1C2CC3C(=C(O)C2(O)C(=O)C(C(=O)NCN2CCCC2)=C1O)C(=O)C1=C(O)C=CC=C1C3(C)O	Rolitetracycline	Drugs	527.227	0.485
DB01319	CC(C)CN(CC(OP(O)(O)=O)C(CC1=CC=CC=C1)NC(=O)OC1CCOC1)S(=O)(=O)C1=CC=C(N)C=C1	Fosamprenavir	Drugs	585.191	3.036
DB01320	OP(O)(=O)OCN1C(=O)NC(C1=O)(C1=CC=CC=C1)C1=CC=CC=C1	Fosphenytoin	Drugs	362.067	1.31
DB01321	COC1C(CC(=O)OC(C)CC=CC=CC(O)C(C)CC(CC=O)C1OC1OC(C)C(OC2CC(C)(O)C(OC(=O)CC(C)C)C(C)O2)C(C1O)N(C)C)OC(C)=O	Josamycin	Drugs	827.467	3.666
DB01228	COC1=CC=C(C=C1)C(=O)NC1=CC=CC=C1C(C)CN1CCCCC1	Encainide	Drugs	352.215	3.686
DB01324	CN1C(CSCC(F)(F)F)NC2=CC(Cl)=C(C=C2S1(=O)=O)S(N)(=O)=O	Polythiazide	Drugs	438.971	1.826
DB01325	CCC1NC(=O)C2=CC(=C(Cl)C=C2N1)S(N)(=O)=O	Quinethazone	Drugs	289.029	0.578
DB01326	CN1N=NN=C1SCC1=C(N2C(SC1)C(NC(=O)C(O)C1=CC=CC=C1)C2=O)C(O)=O	Cefamandole	Drugs	462.078	0.111
DB01327	CC1=NN=C(SCC2=C(N3C(SC2)C(NC(=O)CN2C=NN=N2)C3=O)C(O)=O)S1	Cefazolin	Drugs	454.03	-1.188
DB01328	OC(C(=O)NC1C2SCC(CSC3=NN=NN3CS(O)(=O)=O)=C(N2C1=O)C(O)=O)C1=CC=CC=C1	Cefonicid	Drugs	542.035	-1.919
DB01329	CCN1CCN(C(=O)NC(C(=O)NC2C3SCC(CSC4=NN=NN4C)=C(N3C2=O)C(O)=O)C2=CC=C(O)C=C2)C(=O)C1=O	Cefoperazone	Drugs	645.142	-0.216
DB01330	COC1(NC(=O)C2SC(S2)=C(C(N)=O)C(O)=O)C2SCC(CSC3=NN=NN3C)=C(N2C1=O)C(O)=O	Cefotetan	Drugs	575.002	-1.543
DB01331	COC1(NC(=O)CC2=CC=CS2)C2SCC(COC(N)=O)=C(N2C1=O)C(O)=O	Cefoxitin	Drugs	427.051	-0.812
DB01332	CON=C(C(=O)NC1C2SCC=C(N2C1=O)C(O)=O)C1=CSC(N)=N1	Ceftizoxime	Drugs	383.036	0.344
DB01333	CC1=C(N2C(SC1)C(NC(=O)C(N)C1=CCC=CC1)C2=O)C(O)=O	Cefradine	Drugs	349.11	-1.727
DB01229	CC(=O)OC1C2=C(C)C(CC(O)(C(OC(=O)C3=CC=CC=C3)C3C4(COC4CC(O)C3(C)C1=O)OC(C)=O)C2(C)C)OC(=O)C(O)C(NC(=O)C1=CC=CC=C1)C1=CC=CC=C1	Paclitaxel	Drugs	853.331	4.731
DB01340	CCOC(=O)C(CCC1=CC=CC=C1)NC1CCCN2CCCC(N2C1=O)C(O)=O	Cilazapril	Drugs	417.226	1.473
DB01342	CCCCC1=NN(CC2=CN=C(C=C2)C2=CC=CC=C2C2=NNN=N2)C(CCCC)=N1	Forasartan	Drugs	416.244	4.431
DB01347	CCC1=NC(C2CC2)=C(N1CC1=CC2=C(OC(=C2Br)C2=CC=CC=C2NS(=O)(=O)C(F)(F)F)C=C1)C(N)=O	Saprisartan	Drugs	610.05	6.032
DB01348	CCOC(=O)C(CCC1=CC=CC=C1)NC(C)C(=O)N1CC2(CC1C(O)=O)SCCS2	Spirapril	Drugs	466.16	1.046
DB01349	CC1=NC(C)=C2CCC(=O)N(CC3=CC=C(C=C3)C3=CC=CC=C3C3=NNN=N3)C2=N1	Tasosartan	Drugs	411.181	2.465
DB01351	CCC1(CCC(C)C)C(=O)NC(=O)NC1=O	Amobarbital	Drugs	226.132	2.112
DB01352	CC(C)C1(CC=C)C(=O)NC(=O)NC1=O	Aprobarbital	Drugs	210.1	1.099
DB01353	CCCCC1(CC)C(=O)NC(=O)NC1=O	Butethal	Drugs	212.116	1.713
DB01354	CCC1(C(=O)NC(=O)NC1=O)C1=CCCCCC1	Heptabarbital	Drugs	250.132	2.432
DB01355	CN1C(=O)NC(=O)C(C)(C1=O)C1=CCCCC1	Hexobarbital	Drugs	236.116	1.63
DB01231	OC(CCCN1CCCCC1)(C1=CC=CC=C1)C1=CC=CC=C1	Diphenidol	Drugs	309.209	4.067
DB01357	COC1=CC2=C(C=C1)C1CCC3(C)C(CCC3(O)C#C)C1CC2	Mestranol	Drugs	310.193	4.45
DB01359	CC(C)(C)NCC(O)COC1=CC=CC=C1C1CCCC1	Penbutolol	Drugs	291.22	3.639
DB01361	COC1CC(OC2C(C)C(OC3OC(C)CC(C3OC(C)=O)N(C)C)C(C)CC3(CO3)C(=O)C(C)C(OC(C)=O)C(C)C(C)OC(=O)C2C)OC(C)C1OC(C)=O	Troleandomycin	Drugs	813.451	4.197
DB01362	CC(=O)N(CC(O)CO)C1=C(I)C(C(=O)NCC(O)CO)=C(I)C(C(=O)NCC(O)CO)=C1I	Iohexol	Drugs	820.88	-2.444
DB01365	CNC(C)(C)CC1=CC=CC=C1	Mephentermine	Drugs	163.136	2.287
DB01366	CCC(NC(C)C)C(O)C1=C2C=CC(=O)NC2=C(O)C=C1	Procaterol	Drugs	290.163	0.656
DB01367	C#CCNC1CCC2=CC=CC=C12	Rasagiline	Drugs	171.105	2.524
DB01369	CCC1NC(=O)C(NC(=O)C2=NC=CC=C2O)C(C)OC(=O)C(NC(=O)C2CC(=O)C(CSC3CN4CCC3CC4)CN2C(=O)C(CC2=CC=C(C=C2)N(C)C)N(C)C(=O)C2CCCN2C1=O)C1=CC=CC=C1	Quinupristin	Drugs	1021.47	7.214
DB01377	O=[Mg]	Magnesium oxide	Drugs	39.98	-1.316
DB01380	CC(=O)OCC(=O)C1(O)CCC2C3CCC4=CC(=O)CCC4(C)C3C(=O)CC12C	Cortisone acetate	Drugs	402.204	2.022
DB01232	CC(C)(C)NC(=O)C1CC2CCCCC2CN1CC(O)C(CC1=CC=CC=C1)NC(=O)C(CC(N)=O)NC(=O)C1=NC2=CC=CC=C2C=C1	Saquinavir	Drugs	670.384	4.727
DB01382	COCCOC1=CN=C(NS(=O)(=O)C2=CC=CC=C2)N=C1	Glycodiazine	Drugs	309.078	1.414
DB01384	CC1CC2C3CC(F)C4=CC(=O)C=CC4(C)C3C(O)CC2(C)C1(O)C(=O)CO	Paramethasone	Drugs	392.2	1.985
DB01392	COC(=O)C1C(O)CCC2CN3CCC4=C(NC5=CC=CC=C45)C3CC12	Yohimbine	Drugs	354.194	2.171
DB01393	CC(C)(OC1=CC=C(CCNC(=O)C2=CC=C(Cl)C=C2)C=C1)C(O)=O	Bezafibrate	Drugs	361.108	3.698
DB01394	COC1=C(OC)C(OC)=C2C(CCC(NC(C)=O)C3=CC(=O)C(OC)=CC=C23)=C1	Colchicine	Drugs	399.168	1.195
DB01395	CC12CCC3C(C4CC4C4=CC(=O)CCC34C)C1C1CC1C21CCC(=O)O1	Drospirenone	Drugs	366.219	2.84
DB01396	CC1OC(CC(O)C1O)OC1C(O)CC(OC2C(O)CC(OC3CCC4(C)C(CCC5C4CCC4(C)C(CCC54O)C4=CC(=O)OC4)C3)OC2C)OC1C	Digitoxin	Drugs	764.435	2.854
DB01399	OC(=O)C1=CC=CC=C1OC(=O)C1=CC=CC=C1O	Salsalate	Drugs	258.053	3.334
DB01403	COC1=CC2=C(SC3=C(C=CC=C3)N2CC(C)CN(C)C)C=C1	Methotrimeprazine	Drugs	328.161	4.831
DB01406	CC12CCC3C(CCC4=CC5=C(CC34C)C=NO5)C1CCC2(O)C#C	Danazol	Drugs	337.204	3.927
DB01408	CN(C)C(=O)OC1=CC(=CC(OC(=O)N(C)C)=C1)C(O)CNC(C)(C)C	Bambuterol	Drugs	367.211	0.556
DB01419	FC(F)(F)C1=CC(=CC=C1)N1CCN(CCOC(=O)C2=CC=CC=C2NC2=C3C=CC(=CC3=NC=C2)C(F)(F)F)CC1	Antrafenine	Drugs	588.196	9.307
DB04861	OC(CNCC(O)C1CCC2=C(O1)C=CC(F)=C2)C1CCC2=C(O1)C=CC(F)=C2	Nebivolol	Drugs	405.175	3.5
DB01420	CCC(=O)OC1CCC2C3CCC4=CC(=O)CCC4(C)C3CCC12C	Testosterone Propionate	Drugs	344.235	4.884
DB01421	NCC1OC(OC2C(CO)OC(OC3C(O)C(N)CC(N)C3OC3OC(CO)C(O)C(O)C3N)C2O)C(N)C(O)C1O	Paromomycin	Drugs	615.296	-6.523
DB01422	OC1=C2N=CC=CC2=C(C=C1)[N+]([O-])=O	Nitroxoline	Drugs	190.038	2.084
DB01423	CC(SC(=O)C1=CC=CS1)C(=O)NCC(O)=O	Stepronin	Drugs	273.013	1.179
DB01424	CN(C)C1=C(C)N(C)N(C1=O)C1=CC=CC=C1	Aminophenazone	Drugs	231.137	1.043
DB01425	COC1=CC2=NNN=C2C=C1C(=O)NCC1CCCN1CC=C	Alizapride	Drugs	315.17	1.842
DB01426	CCC1C2CC3C4N(C)C5=CC=CC=C5C44CC(C2C4O)N3C1O	Ajmaline	Drugs	326.199	2.171
DB01427	NC1=CC(=CNC1=O)C1=CC=NC=C1	Amrinone	Drugs	187.075	-0.689
DB01428	COC1=CC(O)=C(C=C1)C(=O)C1=CC=CC=C1	Oxybenzone	Drugs	228.079	3.586
DB01410	CC(C)C(=O)OCC(=O)C12OC(OC1CC1C3CCC4=CC(=O)C=CC4(C)C3C(O)CC21C)C1CCCCC1	Ciclesonide	Drugs	540.309	5.253
DB01429	CCN(CC)CCCN(C1CC2=CC=CC=C2C1)C1=CC=CC=C1	Aprindine	Drugs	322.241	5.898
DB01430	FC1=CC=C(C=C1)C(N1CCN(CC1)C1=NC(NCC=C)=NC(NCC=C)=N1)C1=CC=C(F)C=C1	Almitrine	Drugs	477.245	6.334
DB01431	CC12CCC3C(CCC4=CCCCC34)C1CCC2(O)CC=C	Allylestrenol	Drugs	300.245	6.132
DB01435	CN1N(C(=O)C=C1C)C1=CC=CC=C1	Antipyrine	Drugs	188.095	0.204
DB01436	CC(C)CCCC(C)C1CCC2C(CCCC12C)=CC=C1CC(O)CC(O)C1=C	Alfacalcidol	Drugs	400.334	8.245
DB01437	CCC1(CCC(=O)NC1=O)C1=CC=CC=C1	Glutethimide	Drugs	217.11	1.993
DB01438	NC1=NC(N)=C(C=C1)N=NC1=CC=CC=C1	Phenazopyridine	Drugs	213.101	2.051
DB01463	CCNC1C2CCC(C2)C1C1=CC=CC=C1	Fencamfamine	Drugs	215.167	3.875
DB01544	CN1C2=C(C=C(C=C2)[N+]([O-])=O)C(=NCC1=O)C1=CC=CC=C1F	Flunitrazepam	Drugs	313.086	1.784
DB01558	BrC1=CC2=C(NC(=O)CN=C2C2=CC=CC=N2)C=C1	Bromazepam	Drugs	315.001	1.703
DB01411	O=C(NC1=CC2=C(C=C1)C(=O)C=C(O2)C1=NNN=N1)C1=CC=C(OCCCCC2=CC=CC=C2)C=C1	Pranlukast	Drugs	481.175	5.075
DB01559	CCC1=CC2=C(S1)N(C)C(=O)CN=C2C1=CC=CC=C1Cl	Clotiazepam	Drugs	318.059	3.033
DB01567	CN1C2=C(C=C(Cl)C=C2)C(=NCC1=O)C1=CC=CC=C1F	Fludiazepam	Drugs	302.062	2.754
DB01577	CNC(C)CC1=CC=CC=C1	Methamphetamine	Drugs	149.12	1.888
DB01578	CN(C(C)=O)C1=C(I)C(C(=O)NC2C(O)OC(CO)C(O)C2O)=C(I)C(NC(C)=O)=C1I	Metrizamide	Drugs	788.854	-1.699
DB01579	CC1C(OCCN1C)C1=CC=CC=C1	Phendimetrazine	Drugs	191.131	2.125
DB01580	CC(C)NCC(O)COC1=CC=CC=C1OCC=C	Oxprenolol	Drugs	265.168	2.092
DB01581	CC1=NC(NS(=O)(=O)C2=CC=C(N)C=C2)=NC=C1	Sulfamerazine	Drugs	264.068	0.599
DB01582	CC1=CC(C)=NC(NS(=O)(=O)C2=CC=C(N)C=C2)=N1	Sulfamethazine	Drugs	278.084	1.097
DB01586	CC(CCC(O)=O)C1CCC2C3C(O)CC4CC(O)CCC4(C)C3CCC12C	Ursodeoxycholic acid	Drugs	392.293	4.514
DB01587	CN1C2=C(C=C(Cl)C=C2)C2(OC(C)=CC(=O)N2CC1=O)C1=CC=CC=C1	Ketazolam	Drugs	368.093	3.709
DB01412	CN1C=NC2=C1C(=O)NC(=O)N2C	Theobromine	Drugs	180.065	-0.672
DB01588	ClC1=CC2=C(C=C1)N(CC1CC1)C(=O)CN=C2C1=CC=CC=C1	Prazepam	Drugs	324.103	3.934
DB01589	FC1=CC=CC=C1C1=NCC(=S)N(CC(F)(F)F)C2=C1C=C(Cl)C=C2	Quazepam	Drugs	386.027	3.197
DB01590	COC1CC(CC(C)C2CC(=O)C(C)C=C(C)C(O)C(OC)C(=O)C(C)CC(C)C=CC=CC=C(C)C(CC3CCC(C)C(O)(O3)C(=O)C(=O)N3CCCCC3C(=O)O2)OC)CCC1OCCO	Everolimus	Drugs	957.581	7.103
DB01594	OC1N=C(C2=CC=CC=C2F)C2=C(C=CC(Cl)=C2)N(CCC#N)C1=O	Cinolazepam	Drugs	357.068	1.87
DB01595	[O-][N+](=O)C1=CC2=C(NC(=O)CN=C2C2=CC=CC=C2)C=C1	Nitrazepam	Drugs	281.08	2.321
DB01597	CC1(C)CC1C(=O)NC(=CCCCCSCC(N)C(O)=O)C(O)=O	Cilastatin	Drugs	358.156	0.474
DB01598	CC(O)C1C2CC(SCCN=CN)=C(N2C1=O)C(O)=O	Imipenem	Drugs	299.094	-1.353
DB01599	CC(C)(SC1=CC(=C(O)C(=C1)C(C)(C)C)C(C)(C)C)SC1=CC(=C(O)C(=C1)C(C)(C)C)C(C)(C)C	Probucol	Drugs	516.31	10.967
DB01600	CC(C(O)=O)C1=CC=C(S1)C(=O)C1=CC=CC=C1	Tiaprofenic acid	Drugs	260.051	2.538
DB01601	CC(C)C(N1CCCNC1=O)C(=O)NC(CC(O)C(CC1=CC=CC=C1)NC(=O)COC1=C(C)C=CC=C1C)CC1=CC=CC=C1	Lopinavir	Drugs	628.362	6.095
DB01413	CON=C(C(=O)NC1C2SCC(C[N+]3(C)CCCC3)=C(N2C1=O)C([O-])=O)C1=CSC(N)=N1	Cefepime	Drugs	480.125	-1.333
DB01602	CCOC(=O)OC(C)OC(=O)C1N2C(SC1(C)C)C(NC(=O)C(N)C1=CC=CC=C1)C2=O	Bacampicillin	Drugs	465.157	2.064
DB01603	COC1=CC=CC(OC)=C1C(=O)NC1C2SC(C)(C)C(N2C1=O)C(O)=O	Meticillin	Drugs	380.104	1.783
DB01604	CC(C)(C)C(=O)OCOC(=O)C1N2C(SC1(C)C)C(NC(=O)C(N)C1=CC=CC=C1)C2=O	Pivampicillin	Drugs	463.178	2.518
DB01605	CC(C)(C)C(=O)OCOC(=O)C1N2C(SC1(C)C)C(N=CN1CCCCCC1)C2=O	Pivmecillinam	Drugs	439.214	3.956
DB01606	CC1(CN2C=CN=N2)C(N2C(CC2=O)S1(=O)=O)C(O)=O	Tazobactam	Drugs	300.053	-0.652
DB01607	CC1(C)SC2C(NC(=O)C(C(O)=O)C3=CSC=C3)C(=O)N2C1C(O)=O	Ticarcillin	Drugs	384.045	1.283
DB01608	OC1CCN(CCCN2C3=CC=CC=C3SC3=C2C=C(C=C3)C#N)CC1	Propericiazine	Drugs	365.156	3.236
DB01609	OC(=O)C1=CC=C(C=C1)N1N=C(N=C1C1=CC=CC=C1O)C1=CC=CC=C1O	Deferasirox	Drugs	373.106	3.668
DB01610	CC(C)C(N)C(=O)OCC(CO)OCN1C=NC2=C1NC(N)=NC2=O	Valganciclovir	Drugs	354.165	-2.18
DB01611	CCN(CCO)CCCC(C)NC1=C2C=CC(Cl)=CC2=NC=C1	Hydroxychloroquine	Drugs	335.176	4.116
DB01414	CC(=O)OCC1=C(N2C(SC1)C(NC(=O)CC#N)C2=O)C(O)=O	Cefacetrile	Drugs	339.053	-1.976
DB01612	CC(C)CCON=O	Amyl Nitrite	Drugs	117.079	2.662
DB01613	[O-][N+](=O)OCC(O[N+]([O-])=O)C(CO[N+]([O-])=O)O[N+]([O-])=O	Erythrityl Tetranitrate	Drugs	301.998	2.102
DB01614	CN(C)CCCN1C2=CC=CC=C2SC2=C1C=C(C=C2)C(C)=O	Acepromazine	Drugs	326.145	4.18
DB01615	CC(CN1C2=CC=CC=C2SC2=C1C=C(C=C2)C(C)=O)N(C)C	Aceprometazine	Drugs	326.145	4.18
DB01616	CCN(CCCC1=CC=CC=C1)CCCC1=CC=CC=C1	Alverine	Drugs	281.214	5.499
DB01618	CCC1=C(C)NC2=C1C(=O)C(CN1CCOCC1)CC2	Molindone	Drugs	276.184	2.572
DB01619	CN1CCC2=C(C1)C(C1=CC=CC=C21)C1=CC=CC=C1	Phenindamine	Drugs	261.152	4.068
DB01620	CN(C)CCC(C1=CC=CC=C1)C1=CC=CC=N1	Pheniramine	Drugs	240.163	2.435
DB01621	CN(C)S(=O)(=O)C1=CC2=C(SC3=CC=CC=C3N2CCCN2CCC(CCO)CC2)C=C1	Pipotiazine	Drugs	475.196	4.198
DB01622	CN(C)S(=O)(=O)C1=CC2=C(SC3=CC=CC=C3N2CCCN2CCN(C)CC2)C=C1	Thioproperazine	Drugs	446.181	3.011
DB01415	NC1=NC(=CS1)C(=CCC(O)=O)C(=O)NC1C2SCC=C(N2C1=O)C(O)=O	Ceftibuten	Drugs	410.035	-1.21
DB01623	CN(C)S(=O)(=O)C1=CC2=C(SC3=CC=CC=C3C2=CCCN2CCN(C)CC2)C=C1	Thiothixene	Drugs	443.17	3.228
DB01624	OCCN1CCN(CCC=C2C3=CC=CC=C3SC3=C2C=C(Cl)C=C3)CC1	Zuclopenthixol	Drugs	400.138	4.127
DB01626	CN(CC#C)CC1=CC=CC=C1	Pargyline	Drugs	159.105	2.576
DB01627	CCCC1CC(N(C)C1)C(=O)NC(C(C)O)C1OC(SC)C(O)C(O)C1O	Lincomycin	Drugs	406.214	1.28
DB01628	CC1=NC=C(C=C1)C1=C(C=C(Cl)C=N1)C1=CC=C(C=C1)S(C)(=O)=O	Etoricoxib	Drugs	358.054	2.351
DB01764	CCN(CC)CCS(=O)(=O)C1CCN2C1C(=O)OC(C(C)C)C(C)C=CC(=O)NCC=CC(C)=CC(O)CC(=O)CC1=NC(=CO1)C2=O	Dalfopristin	Drugs	690.33	0.918
DB02300	CC(C=CC(O)C1CC1)C1CCC2C(CCCC12C)=CC=C1CC(O)CC(O)C1=C	Calcipotriol	Drugs	412.298	5.27
DB02546	ONC(=O)CCCCCCC(=O)NC1=CC=CC=C1	Vorinostat	Drugs	264.147	0.989
DB02638	NCCCCC(NC(=O)C1CCCN1C(=O)C1CSSCC(NC(=O)CNC(=O)CNC(=O)CN)C(=O)NC(CC2=CC=C(O)C=C2)C(=O)NC(CC2=CC=CC=C2)C(=O)NC(CCC(N)=O)C(=O)NC(CC(N)=O)C(=O)N1)C(=O)NCC(N)=O	Terlipressin	Drugs	1226.5	-4.067
DB02703	CC1C(O)CCC2(C)C1CCC1(C)C2C(O)CC2C(C(CC12C)OC(C)=O)=C(CCC=C(C)C)C(O)=O	Fusidic Acid	Drugs	516.345	7.284
DB01416	COCC1=C(N2C(SC1)C(NC(=O)C(=NOC)C1=CSC(N)=N1)C2=O)C(O)=O	Cefpodoxime	Drugs	427.062	-0.408
DB03166	CC(O)=O	Acetic acid	Drugs	60.0211	-0.194
DB04552	OC(=O)C1=C(NC2=CC=CC(=C2)C(F)(F)F)N=CC=C1	Niflumic Acid	Drugs	282.062	4.922
DB04570	COC1(NC(=O)C(C(O)=O)C2=CC=C(O)C=C2)C2OCC(CSC3=NN=NN3C)=C(N2C1=O)C(O)=O	Latamoxef	Drugs	520.101	-0.817
DB04571	CC1=CC2=CC3=C(OC(=O)C=C3C)C(C)=C2O1	Trioxsalen	Drugs	228.079	3.469
DB04572	S=P(N1CC1)(N1CC1)N1CC1	Thiotepa	Drugs	189.049	0.524
DB04573	CC12CCC3C(CCC4=C3C=CC(O)=C4)C1CC(O)C2O	Estriol	Drugs	288.173	3.2
DB04574	CC12CCC3C(CCC4=C3C=CC(OS(O)(=O)=O)=C4)C1CCC2=O	Estropipate	Drugs	350.119	1.822
DB04575	CC12CCC3C(CCC4=C3C=CC(OC3CCCC3)=C4)C1CCC2(O)C#C	Quinestrol	Drugs	364.24	5.922
DB04711	OC(=O)C1=C(I)C(NC(=O)CCCCC(=O)NC2=C(I)C=C(I)C(C(O)=O)=C2I)=C(I)C=C1I	Iodipamide	Drugs	1139.51	4.191
DB04786	CC1=C(NC(=O)C2=CC(NC(=O)NC3=CC=CC(=C3)C(=O)NC3=C(C)C=CC(=C3)C(=O)NC3=C4C(C=C(C=C4S(O)(=O)=O)S(O)(=O)=O)=C(C=C3)S(O)(=O)=O)=CC=C2)C=C(C=C1)C(=O)NC1=C2C(C=C(C=C2S(O)(=O)=O)S(O)(=O)=O)=C(C=C1)S(O)(=O)=O	Suramin	Drugs	1296.05	-8.579
DB01418	CC(=O)CC(C1=CC=C(C=C1)[N+]([O-])=O)C1=C(O)OC2=CC=CC=C2C1=O	Acenocoumarol	Drugs	353.09	1.973
DB04794	C1=CN(C=N1)C(C1=CC=CC=C1)C1=CC=C(C=C1)C1=CC=CC=C1	Bifonazole	Drugs	310.147	4.741
DB04835	CC(C)C1=NN=C(C)N1C1CC2CCC(C1)N2CCC(NC(=O)C1CCC(F)(F)CC1)C1=CC=CC=C1	Maraviroc	Drugs	513.328	3.262
DB04837	CN(C)CCC(O)(C1=CC=CC=C1)C1=CC=CC=C1Cl	Chlophedianol	Drugs	289.123	3.63
DB04838	CC1CC(CC(C)(C)C1)OC(=O)C(O)C1=CC=CC=C1	Cyclandelate	Drugs	276.173	4.643
DB04839	CC(=O)C1(O)CCC2C3C=C(Cl)C4=CC(=O)C5CC5C4(C)C3CCC12C	Cyproterone	Drugs	374.165	3.424
DB04840	NC(=N)N1CCC2=CC=CC=C2C1	Debrisoquin	Drugs	175.111	0.895
DB04841	FC1=CC=C(C=C1)C(N1CCN(CC=CC2=CC=CC=C2)CC1)C1=CC=C(F)C=C1	Flunarizine	Drugs	404.206	6.337
DB04842	FC1=CC=C(C=C1)C(CCCN1CCC2(CC1)N(CNC2=O)C1=CC=CC=C1)C1=CC=C(F)C=C1	Fluspirilene	Drugs	475.244	5.416
DB04844	COC1=C(OC)C=C2C3CC(=O)C(CC(C)C)CN3CCC2=C1	Tetrabenazine	Drugs	317.199	3.465
DB04845	CC1CCCC2(C)OC2CC(NC(=O)CC(O)C(C)(C)C(=O)C(C)C1O)C(C)=CC1=CSC(C)=N1	Ixabepilone	Drugs	506.281	3.085
DB04868	CC1=CN(C=N1)C1=CC(=CC(NC(=O)C2=CC(NC3=NC=CC(=N3)C3=CN=CC=C3)=C(C)C=C2)=C1)C(F)(F)F	Nilotinib	Drugs	529.184	5.844
DB04930	CC1(C)C(C=C(Cl)Cl)C1C(=O)OCC1=CC(OC2=CC=CC=C2)=CC=C1	Permethrin	Drugs	390.079	7.61
DB01466	CCOC1=C2OC3C(O)C=CC4C5CC(C=C1)=C2C34CCN5C	Ethylmorphine	Drugs	313.168	1.506
DB04942	CC1(C)CCC(C)(C)C2=C1C=CC(NC(=O)C1=CC=C(C=C1)C(O)=O)=C2	Tamibarotene	Drugs	351.183	6.383
DB04948	CC(OC1=C(Cl)C=CC=C1Cl)C1=NCCN1	Lofexidine	Drugs	258.033	3.463
DB04967	CCN(CC)CCNC1=C2C(=O)C3=CC=CC=C3SC2=C(C)C=C1	Lucanthone	Drugs	340.161	5.194
DB05109	COC1=C(O)C=C2CCNC3(CSC4C5C6N(C)C(CC7=C6C(O)=C(OC)C(C)=C7)C(O)N5C(COC3=O)C3=C5OCOC5=C(C)C(OC(C)=O)=C43)C2=C1	Trabectedin	Drugs	761.262	2.759
DB05246	CN1C(=O)CC(C)(C1=O)C1=CC=CC=C1	Methsuximide	Drugs	203.095	1.461
DB05265	CC(C)C1=C(C=C2C(CCC3C(C)(CCCC23C)C(O)=O)=C1)S(O)(=O)=O	Ecabet	Drugs	380.166	3.307
DB05266	CC(C)C(=O)C1=C2C=CC=CN2N=C1C(C)C	Ibudilast	Drugs	230.142	3.247
DB05271	CCCN(CCC1=CC=CS1)C1CCC2=C(C1)C=CC=C2O	Rotigotine Transdermal Patch	Drugs	315.166	4.543
DB06144	FC1=CC=C(C=C1)N1C=C(C2CCN(CCN3CCNC3=O)CC2)C2=C1C=CC(Cl)=C2	Sertindole	Drugs	440.178	5.267
DB04876	OC12CC3CC(C1)CC(C3)(C2)NCC(=O)N1CCCC1C#N	Vildagliptin	Drugs	303.195	0.692
DB06147	NC1=CC=C(C=C1)S(=O)(=O)NC1=NC=CS1	Sulfathiazole	Drugs	255.014	0.726
DB06148	CN1CCN2C(C1)C1=CC=CC=C1CC1=CC=CC=C21	Mianserin	Drugs	264.163	3.762
DB06150	COC1=NC(OC)=NC(NS(=O)(=O)C2=CC=C(N)C=C2)=C1	Sulfadimethoxine	Drugs	310.074	1.981
DB06151	CC(=O)NC(CS)C(O)=O	Acetylcysteine	Drugs	163.03	-0.624
DB06155	CC1=C(N(N=C1C(=O)NN1CCCCC1)C1=C(Cl)C=C(Cl)C=C1)C1=CC=C(Cl)C=C1	Rimonabant	Drugs	462.078	6.471
DB06196	NC(CCCN=C(N)N)C(=O)NC(CCCN=C(N)N)C(=O)N1CCCC1C(=O)N1CC(O)CC1C(=O)NCC(=O)NC(CC1=CC=CS1)C(=O)NC(CO)C(=O)N1CC2=CC=CC=C2CC1C(=O)N1C2CCCCC2CC1C(=O)NC(CCCN=C(N)N)C(O)=O	Icatibant	Drugs	1303.66	-5.946
DB06209	CC(=O)OC1=CC2=C(CCN(C2)C(C(=O)C2CC2)C2=CC=CC=C2F)S1	Prasugrel	Drugs	373.115	3.431
DB06262	NC(C(O)C1=CC(O)=C(O)C=C1)C(O)=O	Droxidopa	Drugs	213.064	-2.484
DB06267	CCCOC1=C(C=C(C=C1)S(=O)(=O)NCCC1CCCN1C)C1=NC(=O)C2=C(N1)C(CCC)=NN2C	Udenafil	Drugs	516.252	3.147
DB06268	CC1=NOC(NS(=O)(=O)C2=C(SC=C2)C(=O)CC2=CC3=C(OCO3)C=C2C)=C1Cl	Sitaxentan	Drugs	454.006	3.444
DB04877	CCC1CC2CN3CCC4=C(NC5=CC(C6CC7C(C(CC8=C6NC6=CC=CC=C86)N(C)CC7=CC)C(=O)OC)=C(OC)C=C45)C(C2)(C13)C(=O)OC	Voacamine	Drugs	704.394	7.168
DB06274	CC1CN(CC(CC2=CC=CC=C2)C(=O)NCC(O)=O)CCC1(C)C1=CC(O)=CC=C1	Alvimopan	Drugs	424.236	2.164
DB06287	COC1CC(CC(C)C2CC(=O)C(C)C=C(C)C(O)C(OC)C(=O)C(C)CC(C)C=CC=CC=C(C)C(CC3CCC(C)C(O)(O3)C(=O)C(=O)N3CCCCC3C(=O)O2)OC)CCC1OC(=O)C(C)(CO)CO	Temsirolimus	Drugs	1029.6	7.461
DB06288	CCN1CCCC1CNC(=O)C1=CC(=C(N)C=C1OC)S(=O)(=O)CC	Amisulpride	Drugs	369.172	1.801
DB06335	NC(C(=O)N1C2CC2CC1C#N)C12CC3CC(CC(O)(C3)C1)C2	Saxagliptin	Drugs	315.195	-0.023
DB06439	CC1=C(OCCO)C(CC2=C(OCCO)C(CC3=C(OCCO)C=CC(=C3)C(C)(C)CC(C)(C)C)=CC(=C2)C(C)(C)CC(C)(C)C)=CC(=C1)C(C)(C)CC(C)(C)C	Tyloxapol	Drugs	788.595	14.959
DB06694	CC1=CC(=CC(C)=C1CC1=NCCN1)C(C)(C)C	Xylometazoline	Drugs	244.194	5.376
DB06695	CCCCCCOC(=O)N=C(N)C1=CC=C(NCC2=NC3=C(C=CC(=C3)C(=O)N(CCC(=O)OCC)C3=CC=CC=N3)N2C)C=C1	Dabigatran etexilate	Drugs	627.317	4.129
DB06696	NCCC(O)C(=O)NC1CC(N)C(OC2OC(CN)CCC2N)C(O)C1OC1OC(CO)C(O)C(N)C1O	Arbekacin	Drugs	552.312	-4.3
DB06697	COC1OC2OC3(C)CCC4C(C)CCC(C1C)C24OO3	Artemether	Drugs	298.178	3.055
DB06698	CNCCC1=CC=CC=N1	Betahistine	Drugs	136.1	0.082
DB04878	OCC(CO)NC1CC(O)(CO)C(O)C(O)C1O	Voglibose	Drugs	267.132	-2.346
DB06699	CC(C)CC(NC(=O)C(CC1=CC=C(NC(N)=O)C=C1)NC(=O)C(CC1=CC=C(NC(=O)C2CC(=O)NC(=O)N2)C=C1)NC(=O)C(CO)NC(=O)C(CC1=CN=CC=C1)NC(=O)C(CC1=CC=C(Cl)C=C1)NC(=O)C(CC1=CC2=CC=CC=C2C=C1)NC(C)=O)C(=O)NC(CCCCNC(C)C)C(=O)N1CCCC1C(=O)NC(C)C(N)=O	Degarelix	Drugs	1630.75	2.746
DB06700	CN(C)CC(C1=CC=C(O)C=C1)C1(O)CCCCC1	Desvenlafaxine	Drugs	263.189	2.683
DB06702	CC(C)N(CCC(C1=CC=CC=C1)C1=C(OC(=O)C(C)C)C=CC(CO)=C1)C(C)C	Fesoterodine	Drugs	411.277	4.357
DB06706	CNC(C)CCC=C(C)C	Isometheptene	Drugs	141.152	2.351
DB06707	CC(N)C(O)C1=CC(O)=C(O)C=C1	Levonordefrin	Drugs	183.09	-0.68
DB06708	CCCCN(CCCC)CC(O)C1=C2C(=CC(Cl)=C1)C(=CC1=CC=C(Cl)C=C1)C1=C2C=CC(Cl)=C1	Lumefantrine	Drugs	527.155	10.202
DB06710	CC1(O)CCC2C3CCC4=CC(=O)CCC4(C)C3CCC12C	Methyltestosterone	Drugs	302.225	3.928
DB06711	C(C1=NCCN1)C1=CC=CC2=CC=CC=C12	Naphazoline	Drugs	210.116	3.826
DB06712	COC(=O)C1=C(NC(C)=C(C1C1=CC(=CC=C1)[N+]([O-])=O)C(=O)OC(C)C)C#N	Nilvadipine	Drugs	385.127	3.038
DB06713	CCC12CCC3C(CCC4=CC(CCC34)=NO)C1CCC2(O)C#C	Norelgestromin	Drugs	327.22	4.099
DB04880	CSC1=CC=C(C=C1)C(=O)C1=C(C)NC(=O)N1	Enoximone	Drugs	248.062	2.255
DB06714	CNC(C)CC1CCCCC1	Propylhexedrine	Drugs	155.167	2.97
DB06717	CC(OC1OCCN(CC2=NC(=O)N(N2)P(O)(O)=O)C1C1=CC=C(F)C=C1)C1=CC(=CC(=C1)C(F)(F)F)C(F)(F)F	Fosaprepitant	Drugs	614.117	2.753
DB06718	CC1(O)CCC2C3CCC4CC5=NNC=C5CC4(C)C3CCC12C	Stanozolol	Drugs	328.251	4.56
DB06725	CN1C(=C(O)NC2=CC=CC=N2)C(=O)C2=C(C=C(Cl)S2)S1(=O)=O	Lornoxicam	Drugs	370.98	2.916
DB06730	CCC12CCC3C(CCC4=CC(=O)CCC34)C1C=CC2(O)C#C	Gestodene	Drugs	310.193	3.215
DB06751	CCOC1=C(OCC)C=C(C=C2NCCC3=CC(OCC)=C(OCC)C=C23)C=C1	Drotaverine	Drugs	397.225	5.23
DB06766	CN1CCC(CC1)=C1C2=NC=C(C=O)N2CCC2=CC=CC=C12	Alcaftadine	Drugs	307.168	2.453
DB06772	COC1CC2OCC2(OC(C)=O)C2C(OC(=O)C3=CC=CC=C3)C3(O)CC(OC(=O)C(O)C(NC(=O)OC(C)(C)C)C4=CC=CC=C4)C(C)=C(C(OC)C(=O)C12C)C3(C)C	Cabazitaxel	Drugs	835.378	5.441
DB06775	NC(=O)NC(CCC(O)=O)C(O)=O	Carglumic acid	Drugs	190.059	-1.935
DB06781	CCCC(=O)OC1(CCC2C3CC(F)C4=CC(=O)C=CC4(C)C3(F)C(O)CC12C)C(=O)COC(C)=O	Difluprednate	Drugs	508.227	3.442
DB04890	OC(=O)CCCN1CCC(CC1)OC(C1=CC=C(Cl)C=C1)C1=CC=CC=N1	Bepotastine	Drugs	388.155	0.283
DB06782	OCC(S)CS	Dimercaprol	Drugs	124.002	0.18
DB06802	NC(=O)CC1=CC=CC(C(=O)C2=CC=CC=C2)=C1N	Nepafenac	Drugs	254.106	1.385
DB06803	OC1=C(C=C(Cl)C=C1)C(=O)NC1=C(Cl)C=C(C=C1)[N+]([O-])=O	Niclosamide	Drugs	325.986	4.345
DB06804	CCCCCCCCCC1=CC=C(OCCOCCOCCOCCOCCOCCOCCOCCOCCO)C=C1	Nonoxynol-9	Drugs	616.419	5.034
DB06809	C(N1CCCNCCNCCCNCC1)C1=CC=C(CN2CCCNCCNCCCNCC2)C=C1	Plerixafor	Drugs	502.447	-0.249
DB06810	COC(C1CC2=CC3=CC(OC4CC(OC5CC(O)C(O)C(C)O5)C(O)C(C)O4)=C(C)C(O)=C3C(O)=C2C(=O)C1OC1CC(OC2CC(OC3CC(C)(O)C(O)C(C)O3)C(O)C(C)O2)C(O)C(C)O1)C(=O)C(O)C(C)O	Plicamycin	Drugs	1084.47	-3.075
DB08792	CN(C(=O)C(Cl)Cl)C1=CC=C(OC(=O)C2=CC=CO2)C=C1	Diloxanide	Drugs	327.007	3.087
DB08795	CC1(C)SC2C(NC(=O)C(N=[N+]=[N-])C3=CC=CC=C3)C(=O)N2C1C(O)=O	Azidocillin	Drugs	375.1	2.37
DB08796	O=C(OCCOCCN1CCCCC1)N1C2=CC=CC=C2SC2=C1N=CC=C2	Pipazethate	Drugs	399.162	4.094
DB08797	NC(=O)C1=CC=CC=C1O	Salicylamide	Drugs	137.048	1.277
DB04894	CC(C)C1NC(=O)C(CCCCN)NC(=O)C(CC2=CNC3=C2C=CC=C3)NC(=O)C(CC2=CC=C(O)C=C2)NC(=O)C(CSSCC(NC1=O)C(=O)NC(CC1=CC2=CC=CC=C2N1)C(N)=O)NC(=O)C(N)CC1=CC=CC=C1	Vapreotide	Drugs	1130.48	4.279
DB08798	CC1=C(C)N=C(NS(=O)(=O)C2=CC=C(N)C=C2)O1	Sulfamoxole	Drugs	267.068	0.5
DB08799	C(N(CC1=CC=CC=C1)C1=CC=CC=C1)C1=NCCN1	Antazoline	Drugs	265.158	4.112
DB08800	CN(C)CCN(CC1=CC=C(Cl)C=C1)C1=CC=CC=N1	Chloropyramine	Drugs	289.135	4.019
DB08801	CC(C1=C(CCN(C)C)CC2=CC=CC=C12)C1=CC=CC=N1	Dimethindene	Drugs	292.194	3.533
DB08802	CC(CN1C2=CC=CC=C2SC2=C1N=CC=C2)N(C)C	Isothipendyl	Drugs	285.13	3.632
DB08803	CC(C)C1=C(OCC2=NCCN2)C=C(C)C=C1	Tymazoline	Drugs	232.158	3.525
DB08804	CCCCCCCCCC(=O)OC1CCC2C3CCC4=CC(=O)CCC4C3CCC12C	Nandrolone decanoate	Drugs	428.329	8.068
DB08806	CC(=O)OCC(=O)NCCCOC1=CC=CC(CN2CCCCC2)=C1	Roxatidine acetate	Drugs	348.205	2.799
DB08807	CC1=CC2=C(N1)C=CC=C2OCC(CNC(C)(C)C)OC(=O)C1=CC=CC=C1	Bopindolol	Drugs	380.21	4.979
DB08808	CC1=CC(OCC(O)CNC(C)(C)C)=C(Cl)C=C1	Bupranolol	Drugs	271.134	3.1
DB04896	CCN(CC)C(=O)C1(CC1CN)C1=CC=CC=C1	Milnacipran	Drugs	246.173	1.906
DB08810	CCOC1=CC(N)=C(C=C1C(=O)NC1CCN(CC2CCC=CC2)CC1)[N+]([O-])=O	Cinitapride	Drugs	402.227	3.268
DB08811	CCC1C2=CC(OC)=C(OC)C=C2C(=NN=C1C)C1=CC(OC)=C(OC)C=C1	Tofisopam	Drugs	382.189	5.078
DB01230	NC1=NC(=O)C(O1)C1=CC=CC=C1	Pemoline	Drugs	176.059	0.457
DB01439	CCC(=O)N(C1CCN(CCC2=CC=CS2)CC1C)C1=CC=CC=C1	3-Methylthiofentanyl	Drugs	356.192	3.786
DB01441	COC1=CC2=C(NC=C2CCN(C(C)C)C(C)C)C=C1	5-Methoxy-N,N-diisopropyltryptamine	Drugs	274.205	3.802
DB01442	COC1=CC(CC(C)N)=CC2=C1OCO2	MMDA	Drugs	209.105	1.699
DB01444	CC(C=C(C1=CC=CS1)C1=CC=CS1)N(C)C	Dimethylthiambutene	Drugs	263.08	3.429
DB01445	CN(C)CCC1=CNC2=C1C=C(O)C=C2	Bufotenine	Drugs	204.126	1.438
DB01446	CC(N)CC1=CNC2=CC=CC=C12	Alpha-methyltryptamine	Drugs	174.116	1.732
DB01447	CC1N=C(N)OC1C1=CC=CC=C1	4-Methylaminorex	Drugs	176.095	1.435
DB04898	CCOC(=O)CNC(C1CCCCC1)C(=O)N1CCC1C(=O)NCC1=CC=C(C=C1)C(N)=NO	Ximelagatran	Drugs	473.264	2.413
DB01450	CCCC(C)(O)C1CC23CCC1(OC)C1OC4=C(O)C=CC5=C4C21CCN(C)C3C5	Dihydroetorphine	Drugs	413.257	2.747
DB01452	CN1CCC23C4OC5=C(OC(C)=O)C=CC(CC1C2C=CC4OC(C)=O)=C35	Heroin	Drugs	369.158	1.48
DB01453	CCC(=O)N(C1CCN(CC(O)C2=CC=CC=C2)CC1)C1=CC=CC=C1	Beta-hydroxyfentanyl	Drugs	352.215	2.567
DB01454	CNC(C)CC1=CC2=C(OCO2)C=C1	3,4-Methylenedioxymethamphetamine	Drugs	193.11	1.853
DB01459	CCC(=O)N1C(=O)N(C2CCN(CCC(C#N)(C3=CC=CC=C3)C3=CC=CC=C3)CC2)C2=CC=CC=C12	Bezitramide	Drugs	492.253	5.283
DB01460	CCN(CC)CCC1=CNC2=CC=CC=C12	Diethyltryptamine	Drugs	216.163	3.163
DB01461	CCOC(C(=O)OCCN(C)C)(C1=CC=CC=C1)C1=CC=CC=C1	Dimenoxadol	Drugs	327.183	3.675
DB01462	CCOC1=CC=C(CC2=NC3=C(C=CC(=C3)[N+]([O-])=O)N2CCN(CC)CC)C=C1	Etonitazene	Drugs	396.216	5.103
DB01464	CCOC(=O)C1(CCN(CCOCC2CCCO2)CC1)C1=CC=CC=C1	Furethidine	Drugs	361.225	2.952
DB01465	COC1=CC(CC(C)N)=C(OC)C=C1	2,5-Dimethoxyamphetamine	Drugs	195.126	1.75
DB01467	CCC1=CC(OC)=C(CC(C)N)C=C1OC	2,5-Dimethoxy-4-ethylamphetamine	Drugs	223.157	2.778
DB01478	CCC(=O)OC1(CCN(C)CC1)C1=CC=CC=C1	1-Methyl-4-phenyl-4-propionoxypiperidine	Drugs	247.157	2.367
DB04820	O=C(CCNNC(=O)C1=CC=NC=C1)NCC1=CC=CC=C1	Nialamide	Drugs	298.143	0.909
DB01480	COC12C=CC3(CC1C(C)(C)O)C1CC4=C5C(OC2C35CCN1CC1CC1)=C(O)C=C4	Cyprenorphine	Drugs	423.241	2.378
DB01481	CC12CCC3C(CCC4CC(=O)C=CC34C)C1CCC2O	Delta1-dihydrotestosterone	Drugs	288.209	3.409
DB01483	CCC1(CC)C(=O)NC(=O)NC1=O	Barbital	Drugs	184.085	0.655
DB01484	COC1=CC(Br)=C(OC)C=C1CC(C)N	4-Bromo-2,5-dimethoxyamphetamine	Drugs	273.036	2.454
DB01487	CCC(CC)(CNC(=O)CCCO)C1=CC(OC)=CC=C1	Embutramide	Drugs	293.199	2.735
DB01488	CN(C)CCC1=CNC2=CC=CC=C12	Dimethyltryptamine	Drugs	188.131	2.105
DB01489	CN(C)C(=O)OC1N=C(C2=CC=CC=C2)C2=C(C=CC(Cl)=C2)N(C)C1=O	Camazepam	Drugs	371.104	3.443
DB01490	NC1=NCC(O1)C1=CC=CC=C1	Aminorex	Drugs	162.079	0.916
DB01491	CCC(=O)C(CC(C)N1CCCCC1)(C1=CC=CC=C1)C1=CC=CC=C1	Dipipanone	Drugs	349.241	5.297
DB01468	CCN(C)C(C)C=C(C1=CC=CS1)C1=CC=CS1	Ethylmethylthiambutene	Drugs	277.096	3.958
DB01493	CCC1(O)CCC2C3CCC4=CCCCC4C3CCC12C	Ethylestrenol	Drugs	288.245	6.087
DB01496	FC(F)(F)C1=CC=CC=C1C1=CC=C(CC2C(=O)NC(=S)NC2=O)O1	Barbituric acid derivative	Drugs	368.044	3.523
DB01497	CCCC(C)(O)C1CC23C=CC1(OC)C1OC4=C(O)C=CC5=C4C21CCN(C)C3C5	Etorphine	Drugs	411.241	2.463
DB01498	CCC(O)C(CC(C)N(C)C)(C1=CC=CC=C1)C1=CC=CC=C1	Alphamethadol	Drugs	311.225	3.641
DB01499	CCC1CN(C)CCC1(OC(=O)CC)C1=CC=CC=C1	Alphameprodine	Drugs	275.189	3.415
DB01500	CC12CCC3C(CCC4=C(O)C(=O)CCC34)C1CCC2O	4-Hydroxy-19-nortestosterone	Drugs	290.188	2.746
DB01501	OC(=O)C1(CCN(CCC(C#N)(C2=CC=CC=C2)C2=CC=CC=C2)CC1)C1=CC=CC=C1	Difenoxin	Drugs	424.215	2.127
DB01502	CCC(=O)N(CC(C)N(C)CCC1=CC=CC=C1)C1=CC=CC=C1	Diampromide	Drugs	324.22	4.585
DB01505	CCOC(=O)C1(CCN(CCOCCO)CC1)C1=CC=CC=C1	Etoxeridine	Drugs	321.194	1.75
DB01506	NC1(CCCCC1)C1=CC=CC=C1	1-Phenylcyclohexylamine	Drugs	175.136	3.115
DB01469	CCCC(C)(O)C1CC23C=CC1(OC)C1OC4=C(OC(C)=O)C=CC5=C4C21CCN(C)C3C5	Acetorphine	Drugs	453.252	2.469
DB01509	CC(N)CC1=CC2=C(OCO2)C=C1	3,4-Methylenedioxyamphetamine	Drugs	179.095	1.707
DB01511	ClC1=CC2=C(NC(=O)CN=C2C2=CC=CC=C2Cl)C=C1	Delorazepam	Drugs	304.017	3.084
DB01512	CN1CCC23C4OC5=C(O)C=CC(CC1C2(O)CCC4O)=C35	Hydromorphinol	Drugs	303.147	-0.011
DB01514	CC1(O)CCC2C3CCC4CC5=NON=C5CC4(C)C3CCC12C	Furazabol	Drugs	330.231	4.483
DB01515	CN1C2CCC1C(C(C2)OC(=O)C1=CC=CC=C1)C(O)=O	Benzoylecgonine	Drugs	289.131	-0.128
DB01516	COC1=CC(CC(C)N)=CC(OC)=C1OC	3,4,5-Trimethoxyamphetamine	Drugs	225.136	1.042
DB01518	CCOC(=O)C1(CCN(CCOCC2=CC=CC=C2)CC1)C1=CC=CC=C1	Benzethidine	Drugs	367.215	4.2
DB01520	C1CCN(CC1)C1(CCCCC1)C1=CC=CS1	Tenocyclidine	Drugs	249.155	4.746
DB01521	CC12CCC3C(CCC4=C(Cl)C(=O)CCC34C)C1CCC2O	Clostebol	Drugs	322.17	4.182
DB01523	CCN(CC)CCN1C(CC2=CC=C(Cl)C=C2)=NC2=C1C=CC(=C2)[N+]([O-])=O	Clonitazene	Drugs	386.151	5.138
DB01470	CCC(=O)N(C1CCN(CC1)C(C)CC1=CC=CS1)C1=CC=CC=C1	Alpha-methylthiofentanyl	Drugs	356.192	3.576
DB01524	CC12CCC3C(CC=C4CC(O)CCC34C)C1CCC2O	5-Androstenediol	Drugs	290.225	3.471
DB01525	CN1C2CCC1C(C(O)C2)C(O)=O	Ecgonine	Drugs	185.105	-2.722
DB01526	CC12CCC3C(CCC4=CC(O)CCC34C)C1CCC2O	4-Androstenediol	Drugs	290.225	3.671
DB01527	CC(C)(N)CC1=CC=CC=C1Cl	Clortermine	Drugs	183.081	2.854
DB01528	COC1=CC(CC(C)N)=C(OC)C=C1C	4-Methyl-2,5-dimethoxyamphetamine	Drugs	209.142	2.249
DB01529	CC(CN1CCOCC1)C(C(=O)N1CCCC1)(C1=CC=CC=C1)C1=CC=CC=C1	Dextromoramide	Drugs	392.246	4.074
DB01530	CC12CCC3C(CCC4CC(O)CCC34C)C1CCC2O	3Alpha,17beta-dihydroxy-5alpha-androstane	Drugs	292.24	3.955
DB01531	CN1CCC23C4CCCC2C1CC1=C3C(O4)=C(O)C=C1	Desomorphine	Drugs	271.157	2.425
DB01532	CC(CC1=CC=CC=C1)N1CCC(CC1)N(C(C)=O)C1=CC=CC=C1	Acetyl-alpha-methylfentanyl	Drugs	336.22	3.571
DB01533	CCN(CC)C(C)C=C(C1=CC=CS1)C1=CC=CS1	Diethylthiambutene	Drugs	291.112	4.487
DB01471	CC1CC2=CC(=O)CCC2(C)C2CCC3(C)C(CCC3(C)O)C12	Bolasterone	Drugs	316.24	4.247
DB01534	CC(CC(C)(C)O)OC(O)C(Cl)(Cl)Cl	Chlorhexadol	Drugs	264.009	2.146
DB01535	CCC(=O)N(C1=CC=CC=C1)C1(CCN(CCC2=CC=CC=C2)CC1)C(=O)OC	Carfentanil	Drugs	394.226	3.686
DB01536	CC12CCC3C(CCC4=CC(=O)CCC34C)C1CCC2=O	4-Androstenedione	Drugs	286.193	3.007
DB01537	COC1=CC(Br)=C(OC)C=C1CCN	4-Bromo-2,5-dimethoxyphenethylamine	Drugs	259.021	2.145
DB01538	COC1=C2OC3C(CCC4C5CC(C=C1)=C2C34CCN5C)OC(C)=O	Acetyldihydrocodeine	Drugs	343.178	2.164
DB01539	N#CC1(CCCCC1)N1CCCCC1	1-Piperidinocyclohexanecarbonitrile	Drugs	192.163	2.715
DB01541	CC12CCC3C(CCC4=CC(=O)C=CC34C)C1CCC2O	Boldenone	Drugs	286.193	3.585
DB01542	CCC(=O)OC1(CCN(C)CC1CC=C)C1=CC=CC=C1	Allylprodine	Drugs	287.189	3.46
DB01545	CCOC(=O)C1N=C(C2=CC=CC=C2F)C2=C(NC1=O)C=CC(Cl)=C2	Ethyl loflazepate	Drugs	360.068	3.194
DB01546	CCC(N)CC1=CNC2=CC=CC=C12	Alpha-ethyltryptamine	Drugs	188.131	2.261
DB01472	COC1=CC=C(CC(C)N)C=C1	4-Methoxyamphetamine	Drugs	165.115	1.661
DB01547	COC1=C(OC)C2=C(CC3N(C)CCC22CC(O)CCC32O)C=C1	Drotebanol	Drugs	333.194	0.432
DB01548	COC12CCC3(CC1C(C)(C)O)C1CC4=C5C(OC2C35CCN1CC1CC1)=C(O)C=C4	Diprenorphine	Drugs	425.257	2.662
DB01549	C1CCN(C1)C1(CCCCC1)C1=CC=CC=C1	Rolicyclidine	Drugs	229.183	4.541
DB01550	CC(CC1=CC=CC=C1)NCCC#N	Fenproporex	Drugs	188.131	1.689
DB01551	COC1=C2OC3C(O)CCC4C5CC(C=C1)=C2C34CCN5C	Dihydrocodeine	Drugs	301.168	1.261
DB01553	ClC1=CC2=C(NC(=O)CN3CCOC23C2=CC=CC=C2Cl)C=C1	Cloxazolam	Drugs	348.043	4.298
DB01556	CC(C)(N)CC1=CC=C(Cl)C=C1	Chlorphentermine	Drugs	183.081	2.854
DB01557	CCC(=O)N(C1CCN(CC1)C(C)CC1=CC=CC=C1)C1=CC=CC=C1	Alpha-methylfentanyl	Drugs	350.236	3.93
DB01560	CC(N)C(=O)C1=CC=CC=C1	Cathinone	Drugs	149.084	0.845
DB01561	CC12CCC3C(CCC4CC(=O)CCC34C)C1CCC2=O	Androstanedione	Drugs	288.209	3.151
DB01473	CCC(=O)OC1(CCN(C)CC1C)C1=CC=CC=C1	Betaprodine	Drugs	261.173	2.886
DB01562	CC(=O)OC1(CCN(CCC2=CC=CC=C2)CC1)C1=CC=CC=C1	1-(2-Phenylethyl)-4-phenyl-4-acetoxypiperidine	Drugs	323.189	3.935
DB01563	OC(O)C(Cl)(Cl)Cl	Chloral hydrate	Drugs	163.92	0.715
DB01565	CN1CCC23C4OC5=C(O)C=CC(CC1C2CCC4O)=C35	Dihydromorphine	Drugs	287.152	0.856
DB01566	CCNC(C)CC1=CC2=C(OCO2)C=C1	3,4-Methylenedioxy-N-ethylamphetamine	Drugs	207.126	2.382
DB01568	COC1=C2OC3C(O)C=CC4C5CC(C=C1)=C2C34CC[N+]5(C)[O-]	Codeine-N-oxide	Drugs	315.147	1.138
DB01569	CC1(O)CCC2C3CCC4=CC(=O)C(C=O)=CC4(C)C3C(O)CC12C	Formebolone	Drugs	344.199	2.06
DB01570	CCC(=O)N(C1CCN(CC(O)C2=CC=CC=C2)CC1C)C1=CC=CC=C1	Beta-hydroxy-3-methylfentanyl	Drugs	366.231	3.086
DB01571	CCC(=O)N(C1CCN(CCC2=CC=CC=C2)CC1C)C1=CC=CC=C1	3-Methylfentanyl	Drugs	350.236	4.14
DB01573	CN1CCC23C4OC5=C(OCC6=CC=CC=C6)C=CC(CC1C2C=CC4O)=C35	Benzylmorphine	Drugs	375.183	2.915
DB02901	CC12CCC3C(CCC4CC(=O)CCC34C)C1CCC2O	Dihydrotestosterone	Drugs	290.225	3.553
DB01475	CCOC(=O)C(CCN1CCOCC1)(C1=CC=CC=C1)C1=CC=CC=C1	Dioxaphetyl butyrate	Drugs	353.199	4.106
DB03575	C1CCN(CC1)C1(CCCCC1)C1=CC=CC=C1	Phencyclidine	Drugs	243.199	5.1
DB04829	CCN(CC)C(=O)C1CN(C)C2CC3=CNC4=CC=CC(=C34)C2=C1	Lysergic Acid Diethylamide	Drugs	323.2	2.692
DB04833	CC1=CC=CC=C1N1C(C)=NC2=CC=CC=C2C1=O	Methaqualone	Drugs	250.111	3.646
DB00197	CC1=C(C)C2=C(CCC(C)(COC3=CC=C(CC4SC(=O)NC4=O)C=C3)O2)C(C)=C1O	Troglitazone	Drugs	441.161	5.585
DB00439	COCC1=C(C2=CC=C(F)C=C2)C(C=CC(O)CC(O)CC(O)=O)=C(N=C1C(C)C)C(C)C	Cerivastatin	Drugs	459.242	3.564
DB00533	CS(=O)(=O)C1=CC=C(C=C1)C1=C(C(=O)OC1)C1=CC=CC=C1	Rofecoxib	Drugs	314.061	1.798
DB00580	CC1=C(C(=NO1)C1=CC=CC=C1)C1=CC=C(C=C1)S(N)(=O)=O	Valdecoxib	Drugs	314.073	1.832
DB00901	CC1=CC=C(C=C1)C(=O)OC1=C(OC(=O)C2=CC=C(C)C=C2)C=C(C=C1)C(O)CNC(C)(C)C	Bitolterol	Drugs	461.22	5.59
DB00926	CCOC(=O)C=C(C)C=CC=C(C)C=CC1=C(C)C(C)=C(OC)C=C1C	Etretinate	Drugs	354.219	6.82
DB01079	CCCCCN=C(N)NNC=C1C=NC2=C1C=C(CO)C=C2	Tegaserod	Drugs	301.19	0.664
DB01476	FC1=CC=CC=C1C12OCCN1CC(=O)NC1=C2C=C(Br)C=C1	Haloxazolam	Drugs	376.022	3.879
DB01388	COCC(=O)OC1(CCN(C)CCCC2=NC3=CC=CC=C3N2)CCC2=C(C=CC(F)=C2)C1C(C)C	Mibefradil	Drugs	495.29	6.364
DB01405	CC1CN(CCN1)C1=C(F)C=C2C(=O)C(=CN(C2=C1)C1=C(F)C=C(F)C=C1)C(O)=O	Temafloxacin	Drugs	417.13	1.374
DB03585	CCCCC1C(=O)N(N(C1=O)C1=CC=C(O)C=C1)C1=CC=CC=C1	Oxyphenbutazone	Drugs	324.147	2.718
DB03783	CCOC1=CC=C(NC(C)=O)C=C1	Phenacetin	Drugs	179.095	1.765
DB04812	CC(C(O)=O)C1=CC2=C(OC(=N2)C2=CC=C(Cl)C=C2)C=C1	Benoxaprofen	Drugs	301.051	3.824
DB04813	OC1=C(SC2=C(O)C(Cl)=CC(Cl)=C2)C=C(Cl)C=C1Cl	Bithionol	Drugs	353.884	6.165
DB04814	CCCC(=O)NC1=C(I)C=C(I)C(C=C(CC)C(O)=O)=C1I	Bunamiodyl	Drugs	638.826	4.782
DB04815	OC1=C(I)C=C(Cl)C2=C1N=CC=C2	Clioquinol	Drugs	304.91	3.729
DB04816	OC1=CC=CC2=C1C(=O)C1=C(C=CC=C1O)C2=O	Danthron	Drugs	240.042	3.738
DB04818	CC(C)NNC(=O)C1=CC=NC=C1	Iproniazid	Drugs	179.106	0.256
DB04821	CN1CC(C2=CC=CC=C2)C2=C(C1)C(N)=CC=C2	Nomifensine	Drugs	238.147	2.372
DB04831	OC(=O)COC1=C(Cl)C(Cl)=C(C=C1)C(=O)C1=CC=CS1	Ticrynafen	Drugs	329.952	3.233
USAN00106	CCCCC(CC)CNC(=N)NC(=N)NCCCCCCNC(=N)NC(=N)NCC(CC)CCCC	Alexidine	Drugs	508.469	6.152
DB04832	CN(C)CC=C(C1=CC=C(Br)C=C1)C1=CN=CC=C1	Zimelidine	Drugs	316.058	3.194
USAN00001	CCC(C)C1OC2(CC3CC(CC=C(C)C(OC4CC(OC)C(OC5CC(OC)C(O)C(C)O5)C(C)O4)C(C)C=CC=C4COC5C(O)C(C)=CC(C(=O)O3)C45O)O2)C=CC1C	Abamectin B1a	Drugs	872.492	5.104
USAN00002	COC1CC(OC2C(C)OC(CC2OC)OC2C(C)C=CC=C3COC4C(O)C(C)=CC(C(=O)OC5CC(CC=C2C)OC2(C5)OC(C(C)C)C(C)C=C2)C34O)OC(C)C1O	Abamectin B1b	Drugs	858.477	4.575
USAN00003	CN1C(=NC=C1N(=O)=O)C(O)C1=C(O)C=CC(=C1)C(C)(C)C	Abunidazole	Drugs	305.138	2.60047
USAN00004	CC(=O)NCCCN1CCN(CC1)C1=C(Cl)C=CC(Cl)=C1	Acaprazine	Drugs	329.106	3.309
USAN00005	CC1OC(OC2C(CO)OC(OC(C(O)CO)C(O)C(O)C=O)C(O)C2O)C(O)C(O)C1NC1C=C(CO)C(O)C(O)C1O	Acarbose	Drugs	645.248	-7.337
USAN00006	CC(C)CCCC(C)C1CCC2C3CC(Br)C4(Br)CC(CCC4(C)C3CCC12C)OC(C)=O	Acebrochol	Drugs	586.202	11.326
USAN00007	CCCC(=O)NC1=CC=C(OCC(O)CNC(C)C)C(=C1)C(C)=O	Acebutolol	Drugs	336.205	1.71
USAN00008	CCN(CC)CCNC(=O)C1=CC=C(NC(C)=O)C=C1	Acecainide	Drugs	277.179	1.643
DB04822	CCN(CC)CCOCCOC(=O)C(CC)(CC)C1=CC=CC=C1	Oxeladin	Drugs	335.246	5.007
USAN00009	CCC(Br)(CC)C(=O)NC(=O)NC(C)=O	Acecarbromal	Drugs	278.027	1.901
USAN00010	CC(=O)OC1CN2CCC1CC2	Aceclidine	Drugs	169.11	0.744
USAN00011	OC(=O)COC(=O)CC1=CC=CC=C1NC1=C(Cl)C=CC=C1Cl	Aceclofenac	Drugs	353.022	4.744
USAN00012	CC(=O)NC1=CC=C(C=C1)S(=O)(=O)C1=CC=C(NC(C)=O)C=C1	Acedapsone	Drugs	332.083	1.305
USAN00013	NC1=CC=C(C=C1)S(=O)(=O)C1=CC=C(NCC(O)=O)C=C1	Acediasulfone	Drugs	306.067	1.133
USAN00014	CC(=O)NC1=CC=C(C=C1)C(O)=O	Acedoben	Drugs	179.058	1.198
USAN00015	CCC(C(C)C1=CC(OC(C)=O)=C(OC(C)=O)C(F)=C1)C1=CC(OC(C)=O)=C(OC(C)=O)C(F)=C1	Acefluranol	Drugs	492.16	2.98
USAN00016	CC(=O)OCC(=O)OCCC(SC(=O)C1=CC=CO1)=C(C)N(CC1=CN=C(C)N=C1N)C=O	Acefurtiamine	Drugs	476.137	0.674
USAN00017	CN1C2=C(N(CC(=O)OCC(C)(C)OC3=CC=C(Cl)C=C3)C=N2)C(=O)N(C)C1=O	Acefylline Clofibrol	Drugs	420.12	3.195
USAN00018	CN1C2=C(N(CC(O)=O)C=N2)C(=O)N(C)C1=O	Acefylline	Drugs	238.07	-0.658
DB04823	OC1=CC=C(C=C1)C1(C(=O)NC2=CC=CC=C12)C1=CC=C(O)C=C1	Oxyphenisatin	Drugs	317.105	2.489
USAN00019	CC(=O)OC1C2OC(=O)C(OC(C)=O)C2OC1=O	Aceglatone	Drugs	258.038	-1.035
USAN00020	CC(=O)NC(CCC(N)=O)C(O)=O	Aceglutamide	Drugs	188.08	-2.406
USAN00021	COC1=CC2=C(C=C1)N(C(=O)C1=CC=C(Cl)C=C1)C(C)=C2CC(=O)OCC(O)=O	Acemetacin	Drugs	415.082	4.198
USAN00022	CC(=O)CC(C1=CC=C(C=C1)N(=O)=O)C1=C(O)C2=C(OC1=O)C=CC=C2	Acenocoumarol	Drugs	353.09	2.75612
USAN00023	CC(=O)NCC1CN(CCCC(=O)C2=CC=C(F)C=C2)CCC1C1=CC=CC=C1	Aceperone	Drugs	396.221	2.991
USAN00024	CN(C)CCCN1C2=CC=CC=C2SC2=CC=C(C=C12)C(C)=O	Acepromazine	Drugs	326.145	4.18
USAN00025	CC(CN1C2=CC=CC=C2SC2=CC=C(C=C12)C(C)=O)N(C)C	Aceprometazine	Drugs	326.145	4.18
USAN00026	COC1=CC2=C(C=C1)C(C)=C(C(C)=O)C(C)=N2	Acequinoline	Drugs	229.11	3.095
USAN00027	CC1=CC(=O)NS(=O)(=O)O1	Acesulfame	Drugs	162.994	-0.311
USAN00029	CC(=O)NC1=CC=C(OC(=O)C2=C(O)C=CC=C2)C=C1	Acetaminosalol	Drugs	271.084	2.91
DB04824	OC1=CC=C(C=C1)C1(OC(=O)C2=CC=CC=C12)C1=CC=C(O)C=C1	Phenolphthalein	Drugs	318.089	2.579
USAN00030	CC(=O)NC1=CC(=CC=C1O)[As](O)(O)=O	Acetarsone	Drugs	274.977	-1.363
USAN00032	CN1CC(CNC(C)=O)CC2C1CC1=CNC3=C1C2=CC=C3	Acetergamine	Drugs	297.184	1.709
USAN00033	CC(=O)OCCC(SC(C)=O)=C(C)N(CC1=C(N)N=C(C)N=C1)C=O	Acetiamine	Drugs	366.136	0.337
USAN00034	CC(=O)OC1=CC=C(OC2=C(I)C=C(C=C2I)C(O)=O)C=C1I	Acetiromate	Drugs	649.758	6.133
USAN00035	CC(=O)C1=CC(=CC=C1)S(=O)(=O)NC(=O)NC1CCCCC1	Acetohexamide	Drugs	324.114	2.254
USAN00037	CC(=O)C1=CC=C2SC3=CC=CC=C3N(CCCN3CCN(CCO)CC3)C2=C1	Acetophenazine	Drugs	411.198	2.709
USAN00039	CC(=O)NS(=O)(=O)C1=C(C=CC(N)=C1)S(=O)(=O)C1=CC=C(N)C=C1	Acetosulfone	Drugs	369.045	-1.078
USAN00040	CC(=O)NC1=C(I)C(C(O)=O)=C(I)C=C1I	Acetrizoate	Drugs	556.748	1.913
USAN00041	CC(=O)C1=CC2=C(NC=C2CCN)C=C1	Acetryptine	Drugs	202.111	1.168
USAN00045	CC(C)CC(NC(C)=O)C(O)=O	Acetylleucine	Drugs	173.105	0.859
DB04825	CC(CC1=CC=CC=C1)NCCC(C1=CC=CC=C1)C1=CC=CC=C1	Prenylamine	Drugs	329.214	5.802
USAN00046	CC(C)CC(=O)OC1C=C2C(C(OC(=O)CC(C)(C)OC(C)=O)OC=C2COC(C)=O)C11CO1	Acevaltrate	Drugs	480.2	1.619
USAN00047	CC1(OC(=CC1=O)C(O)=O)C1=CC=CC=C1	Acifran	Drugs	218.058	2.187
USAN00048	CC1=N(=O)C=C(N=C1)C(O)=O	Acipimox	Drugs	154.038	-0.987941
USAN00049	CCOC(=O)C1=CN=C2C(CC(O)=O)CCC(C)N2C1=O	Acitemate	Drugs	294.122	0.339
USAN00050	COC1=CC(C)=C(C=CC(C)=CC=CC(C)=CC(O)=O)C(C)=C1C	Acitretin	Drugs	326.188	6.065
USAN00051	NC(C1CC(Cl)=NO1)C(O)=O	Acivicin	Drugs	178.015	-1.579
USAN00052	CC(=O)OCOC(=O)C1=CSC=C1NC1=CC=CC(C)=C1Cl	Aclantate	Drugs	339.033	5.255
USAN00053	CCC1(O)CC(OC2CC(C(OC3CC(O)C(OC4CCC(=O)C(C)O4)C(C)O3)C(C)O2)N(C)C)C2=C(C=C3C(=O)C4=CC=CC(O)=C4C(=O)C3=C2O)C1C(=O)OC	Aclarubicin	Drugs	811.342	3.425
USAN00055	CN(C(C)=O)C1=CC=C(NC2=CC(C)=NC3=CC=C4N=CNC4=C23)C=C1	Acodazole	Drugs	345.159	3.649
USAN00056	OC(=O)COC1=C(C=NN=COC2=CC=NC=C2)C=CC=C1	Aconiazide	Drugs	299.091	0.468
DB04826	CN1CCC(CC1)N(CC1=CC=CS1)C1=CC=CC=C1	Thenalidine	Drugs	286.15	3.779
USAN00057	CC(=O)NCC1(CCN(CC2COC3=CC=CC=C3O2)CC1)C1=CC=CC=C1	Acoxatrine	Drugs	380.21	2.796
USAN00058	CC(CC1=CC=CC=C1)NCCC1=C2C=CC=CC2=NC2=C1C=CC=C2	Acridorex	Drugs	340.194	5.106
USAN00059	NC1=CC2=NC3=C(C=CC(N)=C3)C=C2C=C1	3,6-diaminoacridine	Drugs	209.095	2.309
USAN00060	CC(C)=CC(=O)OC1CCC2(C=O)C3CCC4(C)C(CCC4(O)C3CCC2(O)C1)C1=COC(=O)C=C1	Acrihellin	Drugs	498.262	2.801
USAN00061	CCCCCCC1=CC=C(O)C=C1O	4-hexylresorcinol	Drugs	194.131	3.902
USAN00062	CC1=CC=C(C=C1)C(=CCN1CCCC1)C1=NC(C=CC(O)=O)=CC=C1	Acrivastine	Drugs	348.184	1.461
USAN00063	CC1=CC(=O)C=C2CCC3C4CC5OC(OC5(C(=O)CO)C4(C)CC(O)C3(F)C12)C=C	Acrocinonide	Drugs	432.195	2.135
USAN00064	COC1=CC2=C(C=CC(C)(C)O2)C2=C1C(=O)C1=C(C=CC=C1)N2C	Acronine	Drugs	321.136	3.476
USAN00065	CCOC1=CC=C(C2=C1N=CC=C2)S(O)(=O)=O	Actinoquinol	Drugs	253.041	0.066
USAN00066	CC12CCC3C(CCC4CC(CCC34C)OC3OC(CO)C(O)C(O)C3O)C1(O)CCC2C1=CCOC1=O	Actodigin	Drugs	536.299	2.632
DB04827	CCOC(N)=O	Ethyl carbamate	Drugs	89.0477	-0.175
USAN00067	NC1=NC2=C(N=CN2COCCO)C(=O)N1	Acyclovir	Drugs	225.086	-2.422
USAN00069	ClC1=CC=C(OCC(=O)OCCNC23CC4CC(CC(C4)C2)C3)C=C1	Adafenoxate	Drugs	363.16	4.915
USAN00070	CN(CC1=C(NC(C)=O)C(Br)=CC(Br)=C1)C12CC3CC(CC(C3)C1)C2	Adamexine	Drugs	468.041	4.198
USAN00071	C[S+](CCC(N)C([O-])=O)CC1OC(C(O)C1O)N1C=NC2=C(N)N=CN=C12	Ademetionine	Drugs	398.137	-5.076
USAN00072	NC1=C2N=CN=C2N=CN1	Adenine	Drugs	135.054	-0.227
USAN00075	CC1(C)C(=O)NC2=C1C=C1N=C(NC1=C2)C1=CC=NC=C1	Adibendan	Drugs	278.117	2.548
USAN00076	CC1(C)SC2C(NC(=O)CCCC(N)C(O)=O)C(=O)N2C1C(O)=O	Adicillin	Drugs	359.115	-3.246
USAN00077	CC(C)(CCN1C(=O)NC2=CC=CC=C12)NCC(O)COC1=C2C=CC=CC2=CC=C1	Adimolol	Drugs	419.221	4.63
USAN00079	CCN(CC)CCOC(=O)C(C1=CC=CC=C1)C1=CC=CC=C1	Adiphenine	Drugs	311.189	4.525
USAN00080	COC1=CC(CC2=CN=C(N)N=C2N)=CC(OC)=C1N	Aditeren	Drugs	275.138	0.753
DB04828	CN1C(CC(O)=O)=CC(C)=C1C(=O)C1=CC=C(Cl)C=C1	Zomepirac	Drugs	291.066	2.945
USAN00081	NC1=C2C=CC=CC2=NC2=C1C=CC=C2	Aminacrine	Drugs	194.084	3.086
USAN00082	COC1=CC(CC2=CN=C(N)N=C2N)=CC(OC)=C1N(C)C	Aditoprim	Drugs	303.17	1.875
USAN00083	ONC(=O)CS(=O)C(C1=CC=CC=C1)C1=CC=CC=C1	Adrafinil	Drugs	289.077	0.611
USAN00084	CC1=C(C=CC=C1)N1C(CF)=NC2=C(C=C(N)C=C2)C1=O	Afloqualone	Drugs	283.112	2.741
USAN00085	CC(C)(C)NCC(O)COC1=CC=CC2=C1C(=O)OC2	Afurolol	Drugs	279.147	0.888
USAN00086	NC(=N)NN1CC2=C(C1)C(Cl)=CC=C2Cl	Aganodine	Drugs	244.028	1.509
USAN00087	NC(=O)C1=CC=C(C=C1Cl)N(=O)=O	Aklomide	Drugs	199.999	1.39469
USAN00088	CC(CSC(C)=O)C(=O)N1CCCC1C(=O)NC(CC1=CC=CC=C1)C(O)=O	Alacepril	Drugs	406.156	2.529
USAN00089	CC(N)C(=O)NC(C)P(O)(O)=O	Alafosfalin	Drugs	196.061	-4.233
USAN00091	NC(CN(O)N=O)C(O)=O	Alanosine	Drugs	149.044	-3.415
DB04830	CCCCN=C(N)N=C(N)N	Buformin	Drugs	157.133	-0.995
USAN00092	CC(N)C(=O)OC(C)(C)CC1=CC=C(Cl)C=C1	Alaproclate	Drugs	255.103	3.079
USAN00094	OC1=CC(Cl)=C(Cl)C=C1Cl	2,4,5-trichlorophenol	Drugs	195.925	3.601
USAN00095	CCCSC1=CC2=C(NC(NC(=O)OC)=N2)C=C1	Albendazole	Drugs	265.088	3.461
USAN00096	CCCS(=O)C1=CC2=C(NC(NC(=O)OC)=N2)C=C1	Albendazole Oxide	Drugs	281.083	1.702
USAN00098	CC(C)CC1NC(=S)N(CC=C)C1=O	Albutoin	Drugs	212.098	2.495
USAN00099	OC(=O)CC1=CC=C(Cl)C(OCC=C)=C1	Alclofenac	Drugs	226.04	2.73
USAN00102	NC(=O)NC1N=C(NC1=O)O[Al](O)O	Aldioxa	Drugs	218.023	-2.242
USAN00103	CC12CCC(=O)C=C1CCC1C3CCC(C(=O)CO)C3(CC(O)C21)C=O	Aldosterone	Drugs	360.194	1.759
USAN00104	NC1=C(Cl)C=C(C(=O)NC2CCN(CC3CCC=CC3)CC2)C(OCC=C)=C1	Alepride	Drugs	403.203	3.589
USAN00105	NC(CC=C)CC1=CC=CC=C1	Aletamine	Drugs	161.12	2.316
USAN00108	OCC1OC2OC3C(CO)OC(OC4C(CO)OC(OC5C(CO)OC(OC6C(CO)OC(OC7C(CO)OC(OC1C(O)C2O)C(O)C7O)C(O)C6O)C(O)C5O)C(O)C4O)C(O)C3O	Alfadex	Drugs	972.317	-14.965
USAN00117	ClC1=CC=C(C=C1)C(CN1C=CN=C1)=CC1=C(Cl)C=C(Cl)C=C1	Aliconazole	Drugs	362.014	6.086
USAN00225	CN(C)C(=O)C1(CCN(CCCC(=O)C2=CC=C(F)C=C2)CC1)C1=CC(Cl)=CC=C1	Amiperone	Drugs	430.182	3.711
USAN00118	CC(NCCC(=O)C1CCCCC1)C(O)C1=CC=CC=C1	Alifedrine	Drugs	289.204	3.055
USAN00119	COC1(F)C(F)(F)C1(F)Cl	Aliflurane	Drugs	177.981	2.631
USAN00120	COC(CCNCC=C)(C1=CC=CC=C1)C1=CC=CC=C1	Alimadol	Drugs	281.178	3.959
USAN00121	ClC1=CC=CC(Cl)=C1N(CC=C)C1=NCCN1	Alinidine	Drugs	269.049	2.75
USAN00122	CN(C)NC(=O)C1=CC=C(Cl)C(=C1)S(N)(=O)=O	Alipamide	Drugs	277.029	0.134
USAN00123	CC(NC(=O)C(N)CC(O)=O)C(=O)NC1C(C)(C)SC1(C)C	Alitame	Drugs	331.157	-1.201
USAN00124	COC1=CC2=C(C=C1C(=O)NCC1CCCN1CC=C)N=NN2	Alizapride	Drugs	315.17	2.527
USAN00125	NC(=O)NC1NC(=O)NC1=O	Allantoin	Drugs	158.044	-2.235
USAN00126	CCCC(C)(O)C1CC23C=CC1(OC)C1OC4C5C(CC2N(CC=C)CCC315)=CC=C4O	Alletorphine	Drugs	439.272	2.418
USAN00109	CC12CC(=O)C3C(CCC4CC(O)CCC34C)C1CCC2C(=O)CO	Alfadolone	Drugs	348.23	3.209
USAN00127	C=CCC1(CC=C)C(=O)NC(=O)NC1=O	Allobarbital	Drugs	208.085	0.745
USAN00128	CCN(CC)CCNC(=O)C1=C(OCC=C)C=C(Cl)C=C1	Alloclamide	Drugs	310.145	4.085
USAN00129	OC(=O)C1=CC=CC(NC(S[Cu])=NCC=C)=C1	Allocupreide	Drugs	297.984	1.197
USAN00130	CC1OC(=O)N(CC=C)C1=O	Allomethadione	Drugs	155.058	0.138
USAN00131	O=C1NC=NC2=C1C=NN2	Allopurinol	Drugs	136.039	-0.835
USAN00133	CCC(=O)OC1(CCN(C)CC1CC=C)C1=CC=CC=C1	Allylprodine	Drugs	287.189	3.46
USAN00134	NC(=S)NCC=C	Allylthiourea	Drugs	116.041	0.08
USAN00135	O[Al](O)O[Al](O)O[Mg]OS(=O)(=O)O[Mg]O[Al](O)O[Al](O)O	Almadrate Sulfate	Drugs	417.844	-3.461
USAN00136	CC1(C)SC2C(NC(=O)CSCC=C)C(=O)N2C1C(O)=O	Almecillin	Drugs	330.071	1.556
USAN00137	CC1CC2=C(C=CC(O)=C2)C2CCC3(C)C(CCC3=O)C12	Almestrone	Drugs	284.178	3.701
USAN00110	COC(=O)CCCC=CCC1C(O)CC(O)C1C#CC(O)CCC1CCCCC1	Alfoprostol	Drugs	406.272	4.036
USAN00138	CC(C(O)=O)C1=CC=C(NCC(C)=C)C=C1	Alminoprofen	Drugs	219.126	2.395
USAN00139	FC1=CC=C(C=C1)C(N1CCNC(C1)C1=NC(NCC=C)=NC(NCC=C)=N1)C1=CC=C(F)C=C1	Almitrine	Drugs	477.245	5.078
USAN00140	CNCC1CN(C(=O)O1)C1=CC=C(OCC2=CC=CC(Cl)=C2)C=C1	Almoxatone	Drugs	346.108	3.229
USAN00141	COC(=O)CCNC(=O)C1CSC(C)N1	Alonacic	Drugs	232.088	0.516
USAN00142	O=C1CCC2(CCC(=O)C3=CC=CC=C23)C(=O)N1	Alonimid	Drugs	243.09	0.299
USAN00143	CCOC(=O)C1OC1C(=O)NC(CC(C)C)C(=O)NCCC(C)C	Aloxistatin	Drugs	342.215	2.352
USAN00144	CC(CC#N)N(C)CC(=O)N(C)C1=C(C=C(Cl)C=C1)C(=O)C1=CC=CC=C1F	Alozafone	Drugs	401.131	3.116
USAN00145	CCOC(=O)C1=C(CCN2CCN(CC2)C2=CC=CC=C2)C2=C(N1)C=C(OC)C(OC)=C2	Alpertine	Drugs	437.231	4.781
USAN00146	CCC(OC(C)=O)C(CC(C)N(C)C)(C1=CC=CC=C1)C1=CC=CC=C1	Alphacetylmethadol	Drugs	353.235	4.587
USAN00148	CCC(O)C(CC(C)N(C)C)(C1=CC=CC=C1)C1=CC=CC=C1	Alphamethadol	Drugs	311.225	3.641
USAN00111	CC(=O)C1CCC2C3CCC4CC(O)CCC4(C)C3C(=O)CC12C	Alfaxalone	Drugs	332.235	3.734
USAN00150	CCCN(CCC)C(=O)CC1=C(N=C2C=CC(Cl)=CN12)C1=CC=C(Cl)C=C1	Alpidem	Drugs	403.122	5.581
USAN00151	CNS(=O)(=O)C1=C(N)C=C(OC)C(=C1)C(=O)NCC1CCCN1CC=C	Alpiropride	Drugs	382.167	1.585
USAN00152	CC1=NN=C2CN=C(C3=CC=CC=C3)C3=C(C=CC(Cl)=C3)N12	Alprazolam	Drugs	308.083	2.555
USAN00155	OC(=O)CN1C(=O)C2=CC=CC3=C2C(=CC=C3)C1=O	Alrestatin	Drugs	255.053	2.055
USAN00156	FC1=CC=C(C=C1)C(=O)C1CCN(CCN2C(=S)NC3=C(C=CC=C3)C2=O)CC1	Altanserin	Drugs	411.142	2.579
USAN00157	O=C(CCN1CCC(CC1)C1=CC=CC=C1)NC1=CC=C(C=C1)C1=NNC(=O)CC1	Altapizone	Drugs	404.221	2.81
USAN00158	ClC1=CC=C(C=C1)C1(CN2C=NC=N2)OC1C1=CC=C(Cl)C=C1Cl	Alteconazole	Drugs	379.005	4.052
USAN00159	NS(=O)(=O)C1=CC2=C(NC(CSCC=C)NS2(=O)=O)C=C1Cl	Althiazide	Drugs	382.983	1.049
USAN00160	CC12C=CC3=C4CCC(=O)C=C4CCC3C1CCC2(O)CC=C	Altrenogest	Drugs	310.193	3.105
USAN00162	CC(C)(OC1=CC=C(Cl)C=C1)C(=O)O[Al](O)OC(=O)C(C)(C)OC1=CC=C(Cl)C=C1	Aluminum Clofibrate	Drugs	470.048	6.012
USAN00112	CCN1N=NN(CCN2CCC(COC)(CC2)N(C(=O)CC)C2=CC=CC=C2)C1=O	Alfentanil	Drugs	416.254	2.133
USAN00164	CC(=O)OC1(CCC2C3C=C(Cl)C4=CC(=O)CCC4C3CCC12C)C(C)=O	Amadinone Acetate	Drugs	390.16	3.457
USAN00165	CC12CCC3C(CCC4CC(N)C(O)CC34C)C1CCC2=O	Amafolone	Drugs	305.235	2.393
USAN00166	NC1=NC(NC2=CC=CC=C2)=NC=N1	Amanozine	Drugs	187.086	1.752
USAN00169	CC1(C)SC2C(NC(=O)C34CC5CC(CC(N)(C5)C3)C4)C(=O)N2C1C(O)=O	Amantocillin	Drugs	393.172	-0.705
USAN00170	NC1=CC=C(C=C1)C(=O)N1CC2CC(CN(CC3=CC=CC=C3)C2)C1	Ambasilide	Drugs	335.2	2.731
USAN00171	NC(=N)NN=C1C=CC(C=C1)=NNC(N)=S	Ambazone	Drugs	237.08	0.588
USAN00173	COCCOCCNCC1COC2=C(O1)C=CC=C2	Ambenoxan	Drugs	267.147	1.633
USAN00174	NC1=C(Br)C=C(Br)C=C1CNC1CCC(O)CC1	Ambroxol	Drugs	375.979	2.331
USAN00175	CCC1OC(CC=C1C)C(C)=CC(C)C=CC1C(C)C1C=CC1OC(CC(O)=O)CC(O)C1O	Ambruticin	Drugs	474.298	4.619
USAN00176	CCCCOC1=C(C=CC(N)=C1)C(=O)OCCN(CC)CC	Ambucain	Drugs	308.21	3.94
USAN00113	COC1=CC2=C(C=C1OC)C(N)=NC(=N2)N(C)CCCNC(=O)C1CCCO1	Alfuzosin	Drugs	389.206	2.548
USAN00177	CCCCN(CCCC)C(C(N)=O)C1=CC=C(OC)C=C1	Ambucetamide	Drugs	292.215	3.782
USAN00179	CC(C)(N)CO	2-amino-2-methyl-1-propanol	Drugs	89.0841	-0.587
USAN00180	CC(O)=CC=NC1=C(C=C(C(Cl)=C1)S(N)(=O)=O)S(=O)(=O)NCC=C	Ambuside	Drugs	393.022	-0.017
USAN00181	CCC1(CC)OC2CC3C4CCC5=CC(=O)C=CC5(C)C4(F)C(O)CC3(C)C2(O1)C(=O)CO	Amcinafal	Drugs	462.242	3.267
USAN00182	CC1(OC2CC3C4CCC5=CC(=O)C=CC5(C)C4(F)C(O)CC3(C)C2(O1)C(=O)CO)C1=CC=CC=C1	Amcinafide	Drugs	496.226	3.248
USAN00184	CC1(C)SC2C([N]#CN3CCCCCC3)C(=O)N2C1C(O)=O	Amdinocillin	Drugs	324.138	NaN
USAN00185	CCCC(=O)OC1CC2C3CC(C)C4=CC(=O)CCC4(C)C3C(O)CC2(C)C1C(=O)COC(C)=O	Amebucort	Drugs	488.277	4.551
USAN00186	CNCCCC1(C)C(=O)N(C2=CC=CC=C12)C1=CC=CC=C1	Amedalin	Drugs	294.173	2.297
USAN00187	OCCNCCNC1=CC=C(NCCNCCO)C2=C1C(=O)C1=C(C=CC=C1)C2=O	Ametantrone	Drugs	412.211	2.652
USAN00188	CNCCC1=CC2=C(C=CC=C2)N(C)C2=C1C=CC=C2	Amezepine	Drugs	264.163	3.923
USAN00114	CC(=O)C12OC(C)(C)OC1CC1C3CCC4=CC(=O)CCC4(C)C3CCC21C	Algestone Acetonide	Drugs	386.246	4.282
USAN00189	COC1=[N](N=CC(N)=C1)C1=CC=CC=C1	Amezinium	Drugs	202.098	NaN
USAN00190	NC1=C(C=CC=C1CC(O)=O)C(=O)C1=CC=CC=C1	Amfenac	Drugs	255.09	2.345
USAN00191	CC(CC1=CC=CC=C1)NC(C#N)C1=CC=CC=C1	Amfetaminil	Drugs	250.147	3.291
USAN00192	NC1=C(SN=C1C1=CC=CC(=C1)C(F)(F)F)C(O)=O	Amflutizole	Drugs	288.018	3.421
USAN00193	CCN1C=C(C(O)=O)C(=O)C2=C1N=C(CC1=CC=CC=C1)C=C2	Amfonelic Acid	Drugs	308.116	2.592
USAN00194	NC(=N)C1=CC(NC(=O)NC2=CC(=CC=C2)C(N)=N)=CC=C1	Amicarbalide	Drugs	296.139	0.162
USAN00195	O=C(OCC1=CC=CC=C1)C1(CCN2CCCCCC2)CCCCC1=O	Amicibone	Drugs	357.23	4.253
USAN00196	CN(C)C1C2CC3CC4=C(C(O)=C(N)C=C4)C(=O)C3=C(O)C2(O)C(=O)C(C(N)=O)=C1O	Amicycline	Drugs	429.154	-1.127
USAN00197	COCC(=O)NC1=CC=C(C=C1)N=C(C)N(C)C	Amidantel	Drugs	249.148	0.747
USAN00198	NC(=O)NC1=CC=C(C=C1)S(=O)(=O)C1=CC=C(N)C=C1	Amidapsone	Drugs	291.068	0.872
USAN00115	CC(=O)C12OC(C)(OC1CC1C3CCC4=CC(=O)CCC4(C)C3CCC21C)C1=CC=CC=C1	Algestone Acetophenide	Drugs	448.261	5.321
USAN00199	CNCC(O)C1=CC=CC(NS(C)(=O)=O)=C1	Amidephrine	Drugs	244.088	-0.612
USAN00200	CC(N)CC1=C(C)C=C(C=C1)N(C)C	Amiflamine	Drugs	192.163	2.356
USAN00201	CCOC1=CC(OCCN(CC)CC)=CC(OCC)=C1	Amifloverine	Drugs	281.199	4.357
USAN00202	CNN1C=C(C(O)=O)C(=O)C2=C1C(=CC(F)=C2)N1CCN(C)CC1	Amifloxacin	Drugs	334.144	0.937
USAN00205	CCN(CC)CCOC1=C2OC(C)=CC(=O)C2=C(O)C2=C1OC=C2	Amikhelline	Drugs	331.142	4.267
USAN00206	NC(=N)NC(=O)C1=C(N)N=C(N)C(Cl)=N1	Amiloride	Drugs	229.048	0.108
USAN00207	CN(C)CCOC(=O)C1=CC2=C(C=C1)N(CCN(C)C)C(C)=C2C	Amindocate	Drugs	331.226	3.797
USAN00208	OC(=O)CCCCCCNC1C2=CC=CC=C2CCC2=C1C=CC=C2	Amineptine	Drugs	337.204	2.51
USAN00209	NC1=CC=C(C=C1)C(O)=O	Aminobenzoic Acid	Drugs	137.048	0.978
USAN00211	CCC1(CCC(=O)NC1=O)C1=CC=C(N)C=C1	Aminoglutethimide	Drugs	232.121	0.766
USAN00116	COC1=C(O)C(=CC(CC=C)=C1)C(=O)NCCO	Alibendol	Drugs	251.116	1.812
USAN00213	CCN1C(=O)C=C(N)N(CC=C)C1=O	Aminometradine	Drugs	195.101	0.532
USAN00214	CC(CC(C(N)=O)(C1=CC=CC=C1)C1=CC=CC=C1)N(C)C	Aminopentamide	Drugs	296.189	2.706
USAN00215	CN(C)CC(CN1C2=C(SC3=C1C=CC=C3)C=CC=C2)N(C)C	Aminopromazine	Drugs	327.177	4.427
USAN00216	NC1=NC2=C(N=C(CNC3=CC=C(C=C3)C(=O)NC(CCC(O)=O)C(O)=O)C=N2)C(N)=N1	Aminopterin	Drugs	440.156	-1.365
USAN00217	CN(C)C1=C(C)N(C)N(C1=O)C1=CC=CC=C1	Aminopyrine	Drugs	231.137	1.043
USAN00218	CCN(CC)CCCC(C)NC1=CC(C=CC2=C(Cl)C=CC=C2)=NC2=C1C=CC(Cl)=C2	Aminoquinol	Drugs	455.19	8.465
USAN00219	CC1=NC2=CC=C(NC(=O)NC3=CC4=C(C=C3)N=C(C)C=C4N)C=C2C(N)=C1	Aminoquinuride	Drugs	372.17	4.112
USAN00220	NC1=NCC(O1)C1=CC=CC=C1	Aminorex	Drugs	162.079	0.916
USAN00223	NC1=NC=CS1	Aminothiazole	Drugs	100.01	0.229
USAN00224	CCCCC1OC2=C(C=CC=C2)C1C(=O)C1=CC(I)=C(OCCN(CC)CC)C(I)=C1	Amiodarone	Drugs	647.039	8.279
USAN00226	NC1=NC(N)=C(S1)C1=CC=CC=C1	Amiphenazole	Drugs	191.052	2.07
USAN00235	CN(C)CCC=C1C2=CC=CC=C2CCC2=C1C=CC=C2	Amitriptyline	Drugs	277.183	4.851
USAN00337	CC(=O)OC1=C(C=CC=C1)C(O)=O	Aspirin	Drugs	180.042	1.023
USAN00236	CC(C)CCOC(CN1CCCC1)C1=CC=CC=C1	Amixetrine	Drugs	261.209	4.522
USAN00237	CC(C)C1=CC2=C(OC3=C(C=C(C(O)=O)C(N)=N3)C2=O)C=C1	Amlexanox	Drugs	298.095	3.071
USAN00240	CCN(CC)CC1=CC(NC2=CC=NC3=C2C=CC(Cl)=C3)=CC=C1O	Amodiaquine	Drugs	355.145	5.465
USAN00241	CCN(CC)CCC1(C(=O)OC2=C1C=CC=C2)C1=CC=CC=C1	Amolanone	Drugs	309.173	4.296
USAN00242	CN(C)CCN1C(=O)C2=CC=CC3=C2C(=CC(N)=C3)C1=O	Amonafide	Drugs	283.132	1.954
USAN00243	COC1=CC(=CC(OC)=C1OC)C(=O)OC(COCCC(C)C)CN1CCOCC1	Amoproxan	Drugs	425.241	3.218
USAN00244	OC1=CC=C(NC2=C3C=CC(Cl)=CC3=NC=C2)C=C1CN1CCCC1	Amopyroquine	Drugs	353.129	5.041
USAN00245	CCC(C)(C)C1=CC=C(CC(C)CN2CC(C)OC(C)C2)C=C1	Amorolfine	Drugs	317.272	6.435
USAN00246	O=N(=O)C1=CC=C(NC2=CC=C(C=C2)N=C=S)C=C1	Amoscanate	Drugs	271.042	4.4582
USAN00227	CC(Cl)C(=O)NC1=CC=C(C=C1)C1=NNC(=O)CC1C	Amipizone	Drugs	293.093	1.523
USAN00247	COC1=C(OCCNCC(O)C2=CC=C(C)C(=C2)S(N)(=O)=O)C=CC=C1	Amosulalol	Drugs	380.141	1.065
USAN00248	COC1=CC=C(C=C1)C(CN(C)C)=C(C1=CC=C(OC)C=C1)C1=CC=C(OC)C=C1	Amotriphene	Drugs	403.215	5.173
USAN00249	ClC1=CC=C2OC3=C(C=CC=C3)N=C(N3CCNCC3)C2=C1	Amoxapine	Drugs	313.098	3.406
USAN00250	CCN(CC)CCN(CC)CCOC(=O)C1=CC=C(N)C=C1	Amoxecaine	Drugs	307.226	3.623
USAN00251	CC1(C)SC2C(NC(=O)C(N)C3=CC=C(O)C=C3)C(=O)N2C1C(O)=O	Amoxicillin	Drugs	365.105	-1.872
USAN00252	CN(C)(=O)CCOC(C1=CC=CC=C1)C1=CC=CC=C1	Amoxydramine	Drugs	271.157	2.29022
USAN00253	CCNC(=O)N1CCN(CCCC(C2=CC=C(F)C=C2)C2=CC=C(F)C=C2)CC1	Amperozide	Drugs	401.228	5.367
USAN00254	CC(CC1=CC=CC=C1)N=CC(Cl)(Cl)Cl	Amphecloral	Drugs	263.004	3.417
USAN00255	NC1=CC(=CC=C1)N1C=CC=CC1=O	Amphenidone	Drugs	186.079	1.186
USAN00256	CC(N)CC1=CC=CC=C1	Amphetamine	Drugs	135.105	1.742
USAN00228	CN(C)CCCOC1C(OC2OC(C)(C)OC12)C(O)CO	Amiprilose	Drugs	305.184	-0.157
USAN00257	NC1=CC=C(OCCCCCN2C(=O)C3=C(C=CC=C3)C2=O)C=C1	Amphotalide	Drugs	324.147	3.411
USAN00259	CC1(C)SC2C(NC(=O)C(N)C3=CC=CC=C3)C(=O)N2C1C(O)=O	Ampicillin	Drugs	349.11	-1.204
USAN00260	CCOC(=O)OC(C)OC1=C(N(C)S(=O)(=O)C2=C1C=CC=C2)C(=O)NC1=CC=CC=N1	Ampiroxicam	Drugs	447.11	2.513
USAN00262	NC1=NC2=C(C(N)=N1)C(=NC(N)=N2)C1=CC=CC=C1	Ampyrimine	Drugs	253.108	1.398
USAN00263	CN(C)C1=CN=CC=N1	Ampyzine	Drugs	123.08	0.594
USAN00264	CCCC1=CC2=C(C=C1N(CC)CC)N=CC(C(=O)OC)=C2O	Amquinate	Drugs	316.179	6.054
USAN00266	COC1=C(NC2=C3C=CC=CC3=NC3=C2C=CC=C3)C=CC(NS(C)(=O)=O)=C1	Amsacrine	Drugs	393.115	4.691
USAN00267	CCC(C)(C)O	Amylene Hydrate	Drugs	88.0888	1.002
USAN00268	CCCCCC1=CC=C(C)C=C1O	Amylmetacresol	Drugs	178.136	4.539
USAN00269	CC1CC2C3CCC(OC(C)=O)(C(C)=O)C3(C)CCC2C2(C)CCCC=C12	Anagestone Acetate	Drugs	372.266	6.345
USAN00229	COC1=CC2=C(C=C1OC)C(N)=CC=N2	Amiquinsin	Drugs	204.09	1.948
USAN00270	ClC1=C(Cl)C2=C(C=C1)N=C1NC(=O)CN1C2	Anagrelide	Drugs	254.997	1.022
USAN00271	O=C1N(CC2CO2)N(CC2CO2)C(=O)N1CC1CO1	Anaxirone	Drugs	269.101	-1.199
USAN00272	COC1(C2CCCC1CN(C)C2)C1=CC=CC=C1	Anazocine	Drugs	245.178	3.822
USAN00273	OC1=CC(=CC2=CC(=CC(N=NC3=C4C=CC=C(C4=C(NC4=CC=CC=C4)C=C3)S(O)(=O)=O)=C12)S(O)(=O)=O)S(O)(=O)=O	Anazolene	Drugs	629.023	-0.389
USAN00274	CC(C)(C)NCC(O)COC1=CC=CC=C1NC(=O)C1=CC=CO1	Ancarolol	Drugs	332.174	1.229
USAN00275	OCC1OC2C(OC3=NC(=N)C=CN23)C1O	Ancitabine	Drugs	225.075	-2.755
USAN00276	COC1=CC=C(C=CC)C=C1	Anethole	Drugs	148.089	3.314
USAN00277	CCN(CC)CCC(=NOC(=O)NC1=CC=C(OC)C=C1)C1=CC=CC=C1	Anidoxime	Drugs	369.205	4.995
USAN00278	CNC(=O)OC1=CC=CC=C1C(=O)NC1=CC=CC=C1	Anilamate	Drugs	270.1	2.001
USAN00279	CCOC(=O)C1(CCN(CCC2=CC=C(N)C=C2)CC1)C1=CC=CC=C1	Anileridine	Drugs	352.215	3.097
USAN00230	CN1C(=O)C=C(N)N(CC(C)=C)C1=O	Amisometradine	Drugs	195.101	0.402
USAN00280	COC1=CC2=C(CCN(CCC3=CC=C(N)C=C3)C(C)C2)C=C1	Anilopam	Drugs	310.205	3.438
USAN00281	CCCCCCCCCCCCC(CCCN(C)CCC1=CC=CC(OC)=C1)(C#N)C1=CC=CC(OC)=C1	Anipamil	Drugs	520.403	9.879
USAN00282	COC1=CC=C(C=C1)C(=O)N1CCCC1=O	Aniracetam	Drugs	219.09	0.722
USAN00283	COC1=CC=C(C=C1)C(=O)C1=CC=C2C(CCN12)C(O)=O	Amirolac	Drugs	285.1	1.741
USAN00284	COC1=CC=CC=C1C(C(O)=O)=C(C1=CC=CC=C1)C1=CC=CC=C1	Anisacril	Drugs	330.126	4.944
USAN00285	COC1=CC=C(C=C1)C1C(=O)C2=C(C=CC=C2)C1=O	Anisidione	Drugs	252.079	2.729
USAN00286	COC1=CC=CC=C1N1CCN(CCCC(O)C2=CC=C(F)C=C2)CC1	Anisopirol	Drugs	358.206	3.454
USAN00288	COC1=CC=C(C=C1)C1=C(N=C(C)N=N1)C1=CC=C(OC)C=C1	Anitrazafen	Drugs	307.132	3.137
USAN00289	ClC1=CC=CC(SC2CCNCC2)=N1	Anpirtoline	Drugs	228.049	2.199
USAN00290	CN(C)CCC(OC1=CC2=C(OC(=CC2=O)C2=CC=CC=C2)C=C1)C1=CC=CC=C1	Ansoxetine	Drugs	399.183	5.543
USAN00231	CCN1CCCC1CNC(=O)C1=C(OC)C=C(N)C(=C1)S(=O)(=O)CC	Amisulpride	Drugs	369.172	1.801
USAN00291	C1C(N=C2SC=CN12)C1=CC=CC=C1	Antafenite	Drugs	202.056	2.13
USAN00292	C(N(CC1=CC=CC=C1)C1=CC=CC=C1)C1=NCCN1	Antazoline	Drugs	265.158	4.112
USAN00293	CC(=O)N=C1SC=CN1CC(O)C1=CC=CS1	Antazonite	Drugs	268.034	2.335
USAN00294	OC1=CC=CC2=C1C(=O)C1=C(C2)C=CC=C1O	Anthralin	Drugs	226.063	4.064
USAN00295	CC1=C(O)C2=C(C=C1)C(=O)N1C=C(CC1C(O)N2)C=CC(N)=O	Anthramycin	Drugs	315.122	-0.779
USAN00296	C1C(N=C2SC=CN12)C1=CC=CS1	Antienite	Drugs	208.013	1.776
USAN00297	O=C1O[SbH]23OC1C1O[SbH]4(OC(C(O2)C(=O)O3)C(=O)O4)OC1=O	Antimony Tartrate	Drugs	535.794	-3.222
USAN00298	S=[Sb]S[Sb]=S	Antimony Trisulfide Colloid	Drugs	337.724	1.471
USAN00300	FC(F)(F)C1=CC(=CC=C1)N1CCN(CCOC(=O)C2=CC=CC=C2NC2=CC=NC3=C2C=CC(=C3)C(F)(F)F)CC1	Antrafenine	Drugs	588.196	9.307
USAN00301	CC1(C)SC2C(NC(=O)C(NC(=O)C3=CN=C4C=CC=NC4=C3O)C3=CC=CC=C3)C(=O)N2C1C(O)=O	Apalcillin	Drugs	521.137	4.184
USAN00232	CCC(C)NCC(O)C1=CC=C(N)C=C1	Amiterol	Drugs	208.158	0.719
USAN00302	CCCC1C(=O)N2N(C1=O)C1=C(C=CC(C)=C1)N=C2N(C)C	Apazone	Drugs	300.159	1.785
USAN00303	CN(C)C1C2CC3C(=C(O)C2(O)C(=O)C(C(=O)NC(N2CCN(CCO)CC2)C(O)=O)=C1O)C(=O)C1=C(C=CC=C1O)C3(C)O	Apicycline	Drugs	630.254	0.346
USAN00304	CN1CCC2=CC=CC3=C2C1CC1=C3C(O)=C(O)C=C1	Apomorphine	Drugs	267.126	2.49
USAN00305	CCC12CCCN3CCC4=C(C13)N(C1=C4C=CC=C1)C(=C2)C(=O)OC	Apovincamine	Drugs	336.184	4.298
USAN00306	NC1=CC(Cl)=C(N=C2NCCN2)C(Cl)=C1	Apraclonidine	Drugs	244.028	0.315
USAN00307	CNC1C(O)C2OC(OC3C(N)CC(N)C(O)C3O)C(N)CC2OC1OC1OC(CO)C(N)C(O)C1O	Apramycin	Drugs	539.28	-5.513
USAN00308	CCN(CC)CCCN(C1CC2=C(C1)C=CC=C2)C1=CC=CC=C1	Aprindine	Drugs	322.241	5.898
USAN00310	CCN(CC)CCOC(=O)C(C)(C1=CC=CC=C1)C1=CC=CC=C1	Aprofene	Drugs	325.204	4.924
USAN00311	CN1CCN2C(C1)C1=CC=CN1CC1=C2C=CC=C1	Aptazapine	Drugs	253.158	2.285
USAN00312	CC(N1CCCC1)C(=O)NC1=CC=CC=C1C	Aptocaine	Drugs	232.158	2.105
USAN00233	CC(=O)NC1=CC=C(C=NNC(N)=S)C=C1	Amithiozone	Drugs	236.073	0.884
USAN00313	CC(=O)OC1C=COC=C2CC34SSC5(CC6=COC=CC(O)C6N5C3=O)C(=O)N4C12	Aranotin	Drugs	462.056	0.398
USAN00314	CCCCCC(C)(O)C=CC1C(O)CC(=O)C1CC=CCCCC(O)=O	Arbaprostil	Drugs	366.241	2.412
USAN00316	OC(=O)CN(CC(O)=O)CC(=O)NC1=CC=C(Cl)C=C1C(=O)C1=CC=CC=C1	Arclofenin	Drugs	404.078	2.809
USAN00317	CNC1C2=CC(OC3=CC(C4NC(=O)C(NC1=O)C(O)C1=CC(Cl)=C(OC5=CC6=CC(OC7=C(Cl)C=C(C=C7Cl)C(O)C7NC(=O)C(NC(=O)C6NC4=O)C4=CC(=C(O)C=C4)C4=C(O)C=C(O)C=C4C(NC7=O)C(O)=O)=C5O)C=C1)=C(Cl)C(O)=C3)=C(O)C=C2	Ardacin (Partial Structure)	Drugs	1295.15	3.604
USAN00318	CCOC(=O)N1CCC(=O)N(C2=CC=CC=C2)C2=C1C=CC(Cl)=C2	Arfendazam	Drugs	344.093	3.077
USAN00319	CC1CCN(C(C1)C(O)=O)C(=O)C(CCCNC(N)=N)NS(=O)(=O)C1=CC=CC2=C1NCC(C)C2	Argatroban	Drugs	508.247	-0.569
USAN00321	CCC(=O)C(CCCCCCOC1=C(Cl)C=C(OC)C=C1)C(=O)CC	Arildone	Drugs	368.175	5.252
USAN00322	COCCC1=CC=C(OCC(O)C(C)(C)N)C=C1	Arnolol	Drugs	253.168	1.052
USAN00323	CC1=CC=CC(NC2=NC(NCC(O)=O)=NC(Cl)=C2)=C1C	Aronixil	Drugs	306.088	4.467
USAN00324	CC(C)(C)NCC(O)CSC1=NC(=CS1)C1=CC=C(S1)C(N)=O	Arotinolol	Drugs	371.08	2.081
USAN00234	CN(C=NC1=CC=C(C)C=C1C)C=NC1=C(C)C=C(C)C=C1	Amitraz	Drugs	293.189	5.502
USAN00325	NC1=NC=NC2=C1N=CN2CC1=C(Cl)C=CC=C1F	Arprinocid	Drugs	277.053	1.975
USAN00326	FC1=CC=C(C=C1)C(CCNC(=N)NCCCC1=CNC=N1)C1=NC=CC=C1	Arpromidine	Drugs	380.212	1.467
USAN00327	NC1=CC=C(C=C1)[As](O)(O)=O	Arsanilic Acid	Drugs	216.972	-1.172
USAN00328	CC(=O)NC1=CC(=CC=C1O)[As]1SCC(CO)S1	Arsthinol	Drugs	346.963	1.5
USAN00329	CC1CCC2C(C)C(=O)OC3OC4(C)CCC1C23OO4	Artemisinin	Drugs	282.147	2.716
USAN00330	CCCNC(C)C(=O)NC1=C(SC=C1C)C(=O)OC	Articaine	Drugs	284.119	1.979
USAN00332	CCCCCCCCCCCCCCCC(=O)OCC(O)C1OC(=O)C(O)=C1O	Ascorbyl Palmitate	Drugs	414.262	6.543
USAN00333	COC1=CC=C2CCN(C)C(CCC3=CC=CC=C3)CC3=CC=C(OC)C(O)=C3C2=C1	Asocainol	Drugs	417.23	5.758
USAN00334	COC(=O)C(CC1=CC=CC=C1)NC(=O)C(N)CC(O)=O	Aspartame	Drugs	294.122	-2.135
USAN00336	CC1OC1C1OC(=O)C=CC1OC(C)=O	Asperlin	Drugs	212.068	-0.537
USAN00338	CNC(=O)CC(N)C(=O)NC(C(=O)NC1C2SC(C)(C)C(N2C1=O)C(O)=O)C1=CC=C(O)C=C1	Aspoxicillin	Drugs	493.163	-3.196
USAN00348	CN1C2CCC1CC(C2)OC(=O)C(CO)C1=CC=CC=C1	Atropine	Drugs	289.168	1.299
USAN00448	OP(O)(=O)NC(=N)NC(=N)NCC1=CC=CC=C1	Benfosformin	Drugs	271.083	-0.969
USAN00349	OC(=O)CC(S)C(O)=O	Mercaptosuccinic acid	Drugs	149.999	-0.832
USAN00350	CN(C)(=O)CCC=C1C2=CC=CC=C2CCC2=C1C=CC=C2	Amitriptylinoxide	Drugs	293.178	3.34589
USAN00351	CN1(=O)C2CCC1CC(C2)OC(=O)C(CO)C1=CC=CC=C1	Atropine Oxide	Drugs	305.163	0.163867
USAN00353	OCC1OC(S[Au])C(O)C(O)C1O	Aurothioglucose	Drugs	391.999	-2.416
USAN00354	O=C1C[S-][Au+]N1C1=CC=CC=C1	Aurothioglycanide	Drugs	361.991	NaN
USAN00355	COCC1OC(OC2OCC3OC4(OC3C2OC(=O)C(C)C)OC(C)C(O)(C2OCOC42)C(C)=O)C(OC)C(O)C1OC1OC(C)C(OC)C(OC2CC3(C)OC4(CC(O)C(OC5CC(O)C(OC(=O)C6=C(OC)C(Cl)=C(O)C(Cl)=C6C)C(C)O5)C(C)O4)OC3C(C)O2)C1O	Avilamycin A	Drugs	1402.46	0.813
USAN00356	CCCCCCCCCCCCCCCCCCN(CCCCCCCCCCCCCCCCCC)CCCN(CCO)CCO	Avridine	Drugs	666.7	17.974
USAN00357	ClC1=CC2=C(C=C1)N(C1CCN(CC3COC4=CC=CC=C4O3)CC1)C(=O)N2	Axamozide	Drugs	399.135	4.234
USAN00358	NC1=CC=C(C=C1)S(=O)(=O)N1CC2CCC(CC2)C1	Azabon	Drugs	280.125	2.676
USAN00339	COC1=CC=C(CCN2CCC(CC2)NC2=NC3=C(C=CC=C3)N2CC2=CC=C(F)C=C2)C=C1	Astemizole	Drugs	458.248	5.837
USAN00359	FC1=CC=C(C=C1)C(=O)CCCN1CCN2CCCC2C1	Azabuperone	Drugs	290.179	3.091
USAN00361	ClC1=CC2=C(SC3=C(C=CC=C3)N2C(=O)CCN2CCN3CCCC3C2)C=C1	Azaclorzine	Drugs	413.133	4.203
USAN00362	ClC1=CC(Cl)=C(C=C1)C1(CN2C=NC=N2)OCCO1	Azaconazole	Drugs	299.023	1.955
USAN00363	CN(C)CCCN(C)C1CCC2C3CC=C4CC(O)CCC4(C)C3CCC12C	Azacosterol	Drugs	388.345	5.054
USAN00365	FC(F)(F)C1=CC2=C(SC3=C(C=CC=C3)N2C(=O)CCN2CCN3CCCC3C2)C=C1	Azaftozine	Drugs	447.159	4.415
USAN00366	O=C1NCCN1C1CCN(CCC2COC3=C(O2)C=CC=C3)CC1	Azaloxan	Drugs	331.19	1.091
USAN00368	CCC1(C)CC(OC(=O)CSC2=NN=C(N)N2)C2(C)C3C(=O)CCC3(CCC2C)C(C)C1O	Azamulin	Drugs	478.261	4.591
USAN00369	CN1CCC(CC1)=C1C2=C(OC3=C1C=CC=N3)C=CC=C2	Azanator	Drugs	278.142	3.181
USAN00370	CN1C(C=CC2=CC=NC(N)=N2)=NC=C1N(=O)=O	Azanidazole	Drugs	246.087	0.806756
USAN00371	FC1=CC=C(C=C1)C(=O)CCCN1CCN(CC1)C1=CC=CC=N1	Azaperone	Drugs	327.175	3.339
USAN00340	COC1C(O)C(N)C(OC2OC(CCC2N)C(C)N)C(O)C1N(C)C(=O)CN	Astromicin	Drugs	405.259	-1.227
USAN00372	CCC(=O)N1C2CCC1CN(CC=CC1=CC=CC=C1)C2	Azaprocin	Drugs	284.189	2.844
USAN00373	C1CN2CCC3=C(C=CC=C3)C2CN1	Azaquinzole	Drugs	188.131	1.88
USAN00374	CC(=O)OCC1OC(C(OC(C)=O)C1OC(C)=O)N1N=CC(=O)NC1=O	Azaribine	Drugs	371.096	0.19
USAN00375	C1=C[N](C=C1)#[N]=C1C=CC(C=C1)=[N]#[N]1C=CC=C1	Azarole	Drugs	236.106	NaN
USAN00376	NC(COC(=O)C=[N]#N)C(O)=O	Azaserine	Drugs	173.044	-2.01247
USAN00377	COC1=C2OC=CC2=C(OC)C2=C1OC1=C(C[N]3(CCCCC3)CC1=C)C2=O	Azaspirium	Drugs	382.165	NaN
USAN00378	CC1(O)CCC2C3CC=C4C(C)(C)C5=C(CC4(C)C3CCC12C)C=NO5	Azastene	Drugs	355.251	4.994
USAN00379	CN1CCC(CC1)=C1C2=C(CCC3=C1N=CC=C3)C=CC=C2	Azatadine	Drugs	290.178	3.559
USAN00380	CN1C=NC(=C1SC1=C2N=CN=C2N=CN1)N(=O)=O	Azathioprine	Drugs	277.038	1.13497
USAN00382	CN1CCCC(CC1)N1N=C(CC2=CC=C(Cl)C=C2)C2=C(C=CC=C2)C1=O	Azelastine	Drugs	381.161	4.008
USAN00341	CC1=CC(=O)C=C2CCC3C4CCC(=O)C4(C)CCC3C12C	Atamestane	Drugs	298.193	3.702
USAN00383	CCN1CCC2=C(CC1)N=C(N)O2	Azepexole	Drugs	181.122	-0.129
USAN00384	C1CNCC2=CC3=C(C=CC=C3)N2C1	Azepindole	Drugs	186.116	1.961
USAN00385	CCN(C1=NN=CS1)P(=O)(N1CC1)N1CC1	Azetepa	Drugs	259.066	0.055
USAN00386	OCC(NC(=O)CN=[N]#N)C(O)C1=CC=C(C=C1)N(=O)=O	Azidamfenicol	Drugs	295.092	-0.2947
USAN00387	CC1(C)SC2C(NC(=O)C(N=[N]#N)C3=CC=CC=C3)C(=O)N2C1C(O)=O	Azidocillin	Drugs	375.1	1.1627
USAN00388	CC(C)(N1CC1C#N)N1CC1C(N)=O	Azimexon	Drugs	194.117	0.27
USAN00389	CCN(CC)C(=O)CSC1=CC=C(Cl)N=N1	Azintamide	Drugs	259.055	1.153
USAN00390	CN(CCC1=CC2=CC=CC3=C2N1C1=C(CC3)C=CC=C1)CC1=CC=CC=C1	Azipramine	Drugs	366.21	7.062
USAN00392	CC1(C)SC2C(NC(=O)C(NC(=O)N3CCNC3=O)C3=CC=CC=C3)C(=O)N2C1C(O)=O	Azlocillin	Drugs	461.137	1.563
USAN00393	CN1C(=O)CN(C1=N)C1=CC=CC=C1	Azolimine	Drugs	189.09	0.7
USAN00342	CC(C)NCC(O)COC1=CC=C(CC(N)=O)C=C1	Atenolol	Drugs	266.163	-0.109
USAN00394	NS(=O)(=O)C1=CC(C2=NN=NN2)=C(NCC2=CC=CS2)C=C1Cl	Azosemide	Drugs	370.007	1.362
USAN00395	CC1C(NC(=O)C(=NOC(C)(C)C(O)=O)C2=CSC(N)=N2)C(=O)N1S(O)(=O)=O	Aztreonam	Drugs	435.052	0.337
USAN00396	BrC1=CC=C(C=C1)C1=CN=C(O1)C=NN1CC(=O)NC1=O	Azumolene	Drugs	347.986	1.271
USAN00397	CCOC(=O)OC(C)OC(=O)C1N2C(SC1(C)C)C(NC(=O)C(N)C1=CC=CC=C1)C2=O	Bacampicillin	Drugs	465.157	2.064
USAN00398	NCC(CC(O)=O)C1=CC=C(Cl)C=C1	Baclofen	Drugs	213.056	-0.62
USAN00399	CCOC(=O)OC(C)OC(=O)C1N2C(SC1(C)C)C(N=CN1CCCCCC1)C2=O	Baclofen	Drugs	441.193	3.503
USAN00400	OC(=O)CCNC(=O)C1=CC=C(C=C1)N=NC1=CC(C(O)=O)=C(O)C=C1	Balsalazide	Drugs	357.096	3.209
USAN00401	CN1C=NC2=C1C=CN=C2OCC1=CC=CC=C1Cl	Bamaluzole	Drugs	273.067	3.448
USAN00403	CCCCNCC(O)C1=CC=C(O)C=C1	Bamethan	Drugs	209.142	1.499
USAN00404	CCN(CCO)CCN1C(CC2=CC=CC=C2)=NC2=C1C(=O)N(C)C(=O)N2C	Bamifylline	Drugs	385.211	2.03
USAN00343	CCC1(CC2=C(C1)C=CC=C2)C1=CNC=N1	Atipamezole	Drugs	212.131	3.21
USAN00405	CN1CCC(CC1)N(CC1=CC=CC=C1)C1=CC=CC=C1	Bamipine	Drugs	280.194	4.133
USAN00406	CC1=NC=C(N1CCOC(N)=O)N(=O)=O	Bamnidazole	Drugs	214.07	-0.357017
USAN00407	CN(C)C1=C2N=CC=CC2=C(CC2=C(N)N=C(N)N=C2)C=C1C	Baquiloprim	Drugs	308.175	2.644
USAN00408	CCC1(C(=O)NC(=O)NC1=O)C1=CC=CC=C1	5-Ethyl-5-phenylbarbitutic acid	Drugs	232.085	1.365
USAN00411	CC1=C(CCN2CCC(CC2)NC2=NC3=CC=CN=C3N2CC2=CC=CO2)C(=O)N2C=CC=CC2=N1	Barmastine	Drugs	483.238	2.753
USAN00412	CC(C)NCCCCOC1=C2COCC2=C(CC2=CC=CC=C2)N=C1C	Barucainide	Drugs	354.231	3.799
USAN00413	CCCCCCCCCCCCCCCCCCOCC(O)CO	Batilol	Drugs	344.329	7.421
USAN00414	N#CC1=CC(=NN=C1NCCN1CCOCC1)C1=CC=CC=C1	Bazinaprine	Drugs	309.159	2.311
USAN00415	CCN(CCNC1=CC=C(C)C2=C1C(=O)C1=C(S2)C=CC=C1)CC(C)(C)O	Bacanthone	Drugs	384.187	4.958
USAN00416	ClCCC(=O)NCC1=CC=CC=C1	Beclamide	Drugs	197.061	1.542
USAN00344	CCN1CCN(C(C)C)C2CCN3C4=C(C=CC=C4)C(C)=C3C12	Atiprosin	Drugs	311.236	4.374
USAN00417	CCOC(=O)C(C)(CC)OC1=CC=C(CC2=CC=C(Cl)C=C2)C=C1	Beclobrate	Drugs	346.134	6.135
USAN00418	CCC(=O)OCC(=O)C1(OC(=O)CC)C(C)CC2C3CCC4=CC(=O)C=CC4(C)C3(Cl)C(O)CC12C	Beclomethasone Dipropionate	Drugs	520.223	4.258
USAN00420	CC(C)C1=CC=C(C=C1)C(=O)N(C)CCN1CCN(CC1)C1=C2OC=CC2=CC=C1	Befiperide	Drugs	405.242	5.214
USAN00421	CC(C)NCC(O)COC1=C2OC(=CC2=CC=C1)C(C)=O	Befunolol	Drugs	291.147	1.804
USAN00422	O=C(N1CCN(CC2=CC=CC=C2)CC1)C1=CC2=C(O1)C=CC=C2	Befuraline	Drugs	320.152	3.615
USAN00423	NCC1OC(OC2C(N)CC(N)C(OC3OC(CO)C(O)C(N)C3O)C2O)C(N)C(O)C1O	Bekanamycin	Drugs	483.254	-5.124
USAN00424	OC1=CC=C(CN2CCN(CC2)C(C2=CC=CC=C2)C2=CC=CC=C2)C=C1	Belarizine	Drugs	358.205	4.853
USAN00425	CC(=O)N(CCCC1=CC=CC=C1)OCC1=CC=CC=C1	Beloxamide	Drugs	283.157	4.458
USAN00426	COC1=C(OC)C2=C(NC(=O)N=C2C)C=C1	Bemarinone	Drugs	220.085	0.33
USAN00427	CCC1(C)CC(=O)NC(=O)C1	Bemegride	Drugs	155.095	0.954
USAN00345	CCN(CC)C1=CC(C)=C(NC(=O)C2=CC=CC=C2N)C=C1	Atolide	Drugs	297.184	3.415
USAN00428	CC(C1NC2=C(C=C(C(Cl)=C2)S(N)(=O)=O)S(=O)(=O)N1)C1=CC=CC=C1	Bemetizide	Drugs	401.027	1.971
USAN00429	CCOCCC1=C(N=C(N)N2N=CN=C12)C1=CC=CC=C1	Bemitradine	Drugs	283.143	1.361
USAN00430	CCN(CC)CCOC(=O)C(O)(C1=CC=CC=C1)C1=CC=CC=C1	Benactyzine	Drugs	327.183	3.76
USAN00431	COC1=CC2=C(C=C1OC)C(=NC1CCN(C)CC21)C1=CC=C(NC(C)=O)C=C1	Benafentrine	Drugs	393.205	1.685
USAN00432	CCCN(CC)CCOC(=O)C(O)(C1=CC=CC=C1)C1=CC=CC=C1	Benapryzine	Drugs	341.199	4.289
USAN00433	OC1COC(NC2=CC=C(C=C2)C(O)=O)C(O)C1O	Benaxibine	Drugs	269.09	-0.132
USAN00434	CCOC(=O)C(CCC1=CC=CC=C1)NC1CCC2=C(C=CC=C2)N(CC(O)=O)C1=O	Benazepril	Drugs	424.2	1.824
USAN00435	OC(=O)CN1C2=C(CCC(NC(CCC3=CC=CC=C3)C(O)=O)C1=O)C=CC=C2	Benazeprilat	Drugs	396.169	2.037
USAN00436	OC1CC2=C(OC1C1=CC=C3OC(OC3=C1)(C1=CC=CC=C1)C1=CC=CC=C1)C=C(O)C=C2O	Bencianol	Drugs	454.142	4.879
USAN00437	CC(CSCC(NC(C)=O)C(O)=O)C(=O)C1=CC=CC=C1	Bencisteine	Drugs	309.103	1.402
USAN00347	CN1C2CCC1CC(C2)OC(=O)C(C)(CO)C1=CC=CC=C1	Atromepine	Drugs	303.183	1.698
USAN00438	ClC1=CC=CC(Cl)=C1NC1=NCCN1C(=O)C1=CC=CC=C1	Benclonidine	Drugs	333.044	5.147
USAN00439	CN(C)CCCOC1(CC2=CC=CC=C2)CCCCCC1	Bencylane	Drugs	289.241	5.18
USAN00440	OC(CNCC(O)C1COC2=C(O1)C=CC=C2)C1COC2=C(O1)C=CC=C2	Bendacalol	Drugs	373.153	1.856
USAN00441	CN1C(CCCC(O)=O)=NC2=C1C=CC(=C2)N(CCCl)CCCl	Bendamustine	Drugs	357.101	3.237
USAN00442	OC(=O)COC1=NN(CC2=CC=CC=C2)C2=C1C=CC=C2	Bendazac	Drugs	282.1	3.084
USAN00443	C(C1=NC2=C(N1)C=CC=C2)C1=CC=CC=C1	Bendazol	Drugs	208.1	3.632
USAN00444	COC1=CC=C(CC2(C)CN(CCN2C)C(C2=CC=CC=C2)C2=CC=CC=C2)C=C1OC	Benderizine	Drugs	430.262	5.943
USAN00445	NS(=O)(=O)C1=CC2=C(NC(CC3=CC=CC=C3)NS2(=O)=O)C=C1C(F)(F)F	Bendroflumethiazide	Drugs	421.038	1.727
USAN00446	NC(=N)NCC1CCC(CC1)C(=O)OC1=C(C=CC=C1)C(=O)OCC1=CC=CC=C1	Benexate	Drugs	409.2	3.126
USAN00447	CC(CC1=CC=CC(=C1)C(F)(F)F)NCCOC(=O)C1=CC=CC=C1	Benfluorex	Drugs	351.145	4.893
USAN00449	CC(N(CC1=C(N)N=C(C)N=C1)C=O)=C(CCOP(O)(O)=O)SC(=O)C1=CC=CC=C1	Benfotiamine	Drugs	466.108	0.276
USAN00459	CCCCOC1=CC(=CC=C1N)C(=O)OCCN(CC)CC	Benoxinate	Drugs	308.21	4.36
USAN00571	CC(C)NC=NC1=CC=C(C=C1)C1=CNC(C)=N1	Bisfentidine	Drugs	242.153	2.759
USAN00460	FC1=CC=C(C=C1)C(=O)CCCN1CCC(CC1)N1C(=O)NC2=C1C=CC=C2	Benperidol	Drugs	381.185	3.8
USAN00461	CC(COC1=CC=CC=C1CC1=CC=CC=C1)N1CCCCC1	Benproperine	Drugs	309.209	5.77
USAN00462	CCN(CC)CCOC(=O)N1CCC(CC2=CC=CC=C2)CC1	Benrixate	Drugs	318.231	5.073
USAN00463	OC1=C(Br)C=C(Br)C=C1C(=O)NCC1=CC=C(Br)C=C1	Bensalan	Drugs	460.826	5.982
USAN00464	NC(CO)C(=O)NNCC1=C(O)C(O)=C(O)C=C1	Benserazide	Drugs	257.101	-2.899
USAN00465	OC(=O)CN1CSC(=S)N(CC2=CC=CC=C2)C1	Bensuldazic Acid	Drugs	282.05	0.678
USAN00466	O=C1CN=C(C2=C(N1)SC1=C2CCCC1)C1=CC=CC=C1	Bentazepam	Drugs	296.098	3.514
USAN00467	C(N1C=CN=C1C1=NN=NN1)C1=CC=CC=C1	Bentemazole	Drugs	226.097	1.208
USAN00468	CC(N(CC1=CN=C(C)N=C1N)C=O)=C(CCOC(=O)C1=CC=CC=C1)SC(=O)C1=CC=CC=C1	Bentiamine	Drugs	490.167	3.362
USAN00450	CC(OC(=O)CCC(O)=O)C1=C(C)C2=C(O1)C=CC(=C2)C1=CC(=O)OC1	Benfurodil Hemisuccinate	Drugs	358.105	2.73
USAN00469	CC1=CC=CC=C1CN1CCN(CCSC(C2=CC=CC=C2)C2=CC=CC=C2Cl)CC1	Bentipimine	Drugs	450.19	7.653
USAN00470	OC(=O)C1=CC=C(NC(=O)C(CC2=CC=C(O)C=C2)NC(=O)C2=CC=CC=C2)C=C1	Bentiromide	Drugs	404.137	2.959
USAN00471	ONC(=O)CNC(=O)C1=CC=C(Cl)C=C1	Benurestat	Drugs	228.03	0.328
USAN00472	O=CC1=CC=CC=C1	Benzaldehyde	Drugs	106.042	1.495
USAN00473	CN(C)(=O)CCC=C1C2=CC=CC(Cl)=C2C=CC2=C1C=CC=C2	Benzaprinoxide	Drugs	325.123	3.69826
USAN00474	CCC1=C(C(=O)C2=CC=C(O)C=C2)C2=C(O1)C=CC=C2	Benzarone	Drugs	266.094	4.642
USAN00475	CCC1=C(C(=O)C2=CC(Br)=C(O)C(Br)=C2)C2=C(O1)C=CC=C2	Benzbromarone	Drugs	421.915	5.978
USAN00476	CCC(C(C)C1=CC=C(O)C=C1)C(CC)C1=CC=C(O)C=C1	Benzestrol	Drugs	298.193	6.038
USAN00477	CCOC(=O)C1(CCN(CCOCC2=CC=CC=C2)CC1)C1=CC=CC=C1	Benzethidine	Drugs	367.215	4.2
USAN00479	O=C1CCC(C2CCN(CC3=CC=CC=C3)CC2)(C(=O)N1)C1=CC=CC=C1	Benzetimide	Drugs	362.199	3.31
USAN00451	O=C1N=C2C=CC=CC=C2N1CC1=CC=CC=C1	Benhepazone	Drugs	236.095	2.189
USAN00481	C(CC1=CC=NC=C1)C1=CN(CC2=CC=CC=C2)C2=C1C=CC=C2	Benzindopyrine	Drugs	312.163	5.065
USAN00482	CCC1=C(C(=O)C2=CC(I)=C(O)C(I)=C2)C2=C(O1)C=CC=C2	Benziodarone	Drugs	517.888	6.358
USAN00483	CC(NC(=O)C=CC(O)=O)C(CC1=CC=C(Cl)C=C1)C1=CC=C(Cl)C=C1	Benzmalecene	Drugs	391.074	4.885
USAN00484	O=C(CN1C=CN=C1N(=O)=O)NCC1=CC=CC=C1	Benznidazole	Drugs	260.091	1.33437
USAN00485	CCC1(C(=O)NC(=O)N(C(=O)C2=CC=CC=C2)C1=O)C1=CC=CC=C1	Benzobarbital	Drugs	336.111	2.38
USAN00487	O=C(OC1CN2CCC1CC2)C1=CC=CC=C1	Benzoclidine	Drugs	231.126	2.468
USAN00488	CNCC12CCC(C3=CC=CC=C13)C1=C2C=CC=C1	Benzoctamine	Drugs	249.152	3.616
USAN00489	O=C(NP(=O)(N1CC1)N1CC1)OCC1=CC=CC=C1	Benzodepa	Drugs	281.093	1.46
USAN00491	OC(=O)C1=CC=CC=C1	Benzoic Acid	Drugs	122.037	1.885
USAN00493	OC(=O)C(CC1=CNC2=C1C=CC=C2)NC(=O)C1=CC=C(Cl)C=C1	Benzotript	Drugs	342.077	3.285
USAN00452	COC(=O)C1=C(C)NC(C)=C(C1C1=CC=CC(=C1)N(=O)=O)C(=O)OC1CCCN(CC2=CC=CC=C2)C1	Benidipine	Drugs	505.221	4.04583
USAN00494	O=C(OC1=CC=CC2=C1N=CC=C2)C1=CC=CC=C1	Benzoxiquine	Drugs	249.079	3.883
USAN00496	O=C(OOC(=O)C1=CC=CC=C1)C1=CC=CC=C1	Benzoyl Peroxide	Drugs	242.058	2.78
USAN00497	OC(=O)C1=C(O)C=C(NC(=O)C2=CC=CC=C2)C=C1	Benzoylpas	Drugs	257.069	2.784
USAN00498	CC(CC1=CC=CC=C1)N(C)CC1=CC=CC=C1	Benzphetamine	Drugs	239.167	4.382
USAN00499	CN1CCC(CC1)N1NC(=C(CC2=CC=CC=C2)C1=O)C1=CC=CC=C1	Benzpiperylon	Drugs	347.2	2.683
USAN00501	O=C1C(OCC2=CC=CC=C2)=C(OC2=C1C(OCC1=CC=CC=C1)=CC(OCC1=CC=CC=C1)=C2)C1=CC(OCC2=CC=CC=C2)=C(OCC2=CC=CC=C2)C=C1	Benzquercin	Drugs	752.277	11.578
USAN00502	CCN(CC)C(=O)C1CN2CCC3=C(C=C(OC)C(OC)=C3)C2CC1OC(C)=O	Benzquinamide	Drugs	404.231	3.02
USAN00503	NS(=O)(=O)C1=CC2=C(C=C1Cl)N=C(CSCC1=CC=CC=C1)NS2(=O)=O	Benzthiazide	Drugs	430.983	2.172
USAN00504	CN1C2CCC1CC(C2)OC(C1=CC=CC=C1)C1=CC=CC=C1	Benztropine	Drugs	307.194	3.52
USAN00505	CN(C)CCCOC1=NN(CC2=CC=CC=C2)C2=C1C=CC=C2	Benzydamine	Drugs	309.184	4.244
USAN00453	CC(NNC(=O)C1=CC=CC=C1)C1=CC=CC=C1	Benmoxin	Drugs	240.126	2.248
USAN00506	OCC1=CC=CC=C1	Benzyl Alcohol	Drugs	108.058	1.104
USAN00509	NS(=O)(=O)C1=CC=C(NCC2=CC=CC=C2)C=C1	Benzylsulfamide	Drugs	262.078	1.63
USAN00512	CN(C)CCN1C2=C(SC3=C(C=CC=N3)C1=O)C=CC=C2	Bepiastine	Drugs	299.109	2.372
USAN00513	CC(C)COCC(CN(CC1=CC=CC=C1)C1=CC=CC=C1)N1CCCC1	Bepridil	Drugs	366.267	6.2
USAN00514	CC#CCC(C)C(O)C=CC1C(O)CC2OC3=C(C=CC=C3CCCC(O)=O)C12	Beraprost	Drugs	398.209	2.044
USAN00515	CC(C(O)=O)C1=CC=C2OC3=C(CC(=O)C2=C1)C=C(C)C=C3	Bermoprofen	Drugs	296.105	3.655
USAN00516	CCC1OC(=O)C(C)C(OC2CC(C)(OC)C(O)C(C)O2)C(C)C(OC2OC(C)CC(C2O)N(C)C)C(C)(O)CC(C)C(=O)C(C)C(O)C1C	Berythromycin	Drugs	717.466	1.919
USAN00517	CC1=CC(C)=[N+]([N-]C(=O)C2=CC=C(Cl)C(=C2)S(N)(=O)=O)C(C)=C1	Besulpamide	Drugs	353.06	2.269
USAN00518	CCCCNC1=CC(=CC(=C1CC1=CC=CC=C1)S(N)(=O)=O)C(O)=O	Besunide	Drugs	362.13	3.821
USAN00519	CC(C=CC=C(C)C=CC1=C(C)CCCC1(C)C)=CC=CC=C(C)C=CC=C(C)C=CC1=C(C)CCCC1(C)C	Beta Carotene	Drugs	536.438	15.232
USAN00454	COC1=CC2=C(C=C1OC)C1CC(=NO)C3CCCCC3N1CC2	Benolizime	Drugs	330.194	3.152
USAN00520	CCC(C(=O)OC)C(CC(C)N(C)C)(C1=CC=CC=C1)C1=CC=CC=C1	Betacetylmethadol	Drugs	353.235	4.587
USAN00523	CCOC(=O)C1(CCN(C)CC1CC)C1=CC=CC=C1	Betameprodine	Drugs	275.189	3.275
USAN00524	CCC(O)C(CC(C)N(C)C)(C1=CC=CC=C1)C1=CC=CC=C1	Betamethadol	Drugs	311.225	3.641
USAN00526	CC(C)C(=O)OC1(C(C)CC2C3CCC4=CC(=O)C=CC4(C)C3(F)C(O)CC12C)C(=O)COC(C)=O	Betamethasone Acibutate	Drugs	504.252	3.698
USAN00527	CCC(=O)OCC(=O)C1(OC(=O)CC)C(C)CC2C3CCC4=CC(=O)C=CC4(C)C3(F)C(O)CC12C	Betamethasone Dipropionate	Drugs	504.252	3.918
USAN00528	CCCCC(=O)OC1(C(C)CC2C3CCC4=CC(=O)C=CC4(C)C3(F)C(O)CC12C)C(=O)CO	Betamethasone Valerate	Drugs	476.257	3.909
USAN00529	CNC1C(O)C(OC2C(N)CC(N)C(OC3OC(CN)C(O)C(O)C3O)C2O)OCC1(C)O	Betamicin	Drugs	482.259	-3.503
USAN00532	NCCC1=NNC=C1	Betazole	Drugs	111.08	-0.698
USAN00535	OC(=O)CNC(=O)CNC(=O)CNC(=O)CSC(=O)C1=CC=CC=C1	Betiatide	Drugs	367.084	-0.065
USAN00536	CCCCOC1=CC=C(C=C1N)C(=O)OCCOCCN(CC)CC	Betoxycaine	Drugs	352.236	4.424
USAN00455	CC(=O)NC1=CC=C(OC(=O)C2=C(OC(C)=O)C=CC=C2)C=C1	Benorilate	Drugs	313.095	2.05
USAN00537	COC1=CC=C(CCNCC(O)COC2=CC=CC(C)=C2)C=C1OC	Bevantolol	Drugs	345.194	2.995
USAN00539	CC(C)(OC1=CC=C(CCNC(=O)C2=CC=C(Cl)C=C2)C=C1)C(O)=O	Bezafibrate	Drugs	361.108	3.698
USAN00540	CCC(=O)N1C(=O)N(C2CCN(CCC(C#N)(C3=CC=CC=C3)C3=CC=CC=C3)CC2)C2=C1C=CC=C2	Bezitramide	Drugs	492.253	5.283
USAN00541	CCN(CC)CC1=CC(=CC(CC=C)=C1O)C1=CC(CN(CC)CC)=C(O)C(CC=C)=C1	Bialamicol	Drugs	436.309	6.426
USAN00543	O[Bi]1OC2=C(O1)C(Br)=C(Br)C(Br)=C2Br	Bibrocathol	Drugs	645.646	3.191
USAN00544	CC1=CC=C(C=C1)C12CC1CNC2	Bicifaine	Drugs	173.12	2.188
USAN00545	NC(=O)NC(=N)NC1=C(Cl)C=CC=C1Cl	Biclodil	Drugs	246.008	2.041
USAN00546	CN1CCCC1COC(=O)C(OC1=CC=C(Cl)C=C1)OC1=CC=C(Cl)C=C1	Biclofibrate	Drugs	409.085	5.62
USAN00547	CC(C)C1=CC(Cl)=C(C)C(CC2=C(O)C(=CC(Cl)=C2C)C(C)C)=C1O	Biclotymol	Drugs	380.131	7.847
USAN00548	CC(O)(CO)C(O)C12NC(=O)C(O)(NC1=O)C(=C)CCO2	Bicozamycin	Drugs	302.111	-1.505
USAN00456	CC1(O)CCC2C3CC4=CC(=O)CCC4(C)C3CCC12C	Benorterone	Drugs	288.209	3.369
USAN00550	CCN(CC)CCOC(=O)C(N1CCCCC1)C1=CC=CC=C1	Bietamiverine	Drugs	318.231	4.41
USAN00551	CCN(CC)CCN1C2=C(C=CC(OC)=C2)C2=C1C1CC3C(CC(C(OC)C3C(=O)OC)C(=O)OC3=CC(OC)=C(OC)C(OC)=C3)CN1CC2	Bietaserpine	Drugs	707.378	4.909
USAN00552	CNCCCCOC1=CC=CC=C1CC1=CC=CC=C1	Bifemelane	Drugs	269.178	3.974
USAN00553	CCN(CC)CCNC(=O)C(C)C1=CC=C(C=C1)C1=CC=CC=C1	Bifepramide	Drugs	324.22	4.538
USAN00554	CC(C(=O)OCC(=O)N1CCN(C)CC1)C1=CC=C(C=C1)C1=CC=CC=C1Cl	Bifeprofen	Drugs	400.155	4.48
USAN00555	CCC(C(C)C1=CC(F)=C(O)C=C1)C1=CC(F)=C(O)C=C1	Bifluranol	Drugs	292.127	5.061
USAN00556	C1=CN(C=N1)C(C1=CC=CC=C1)C1=CC=C(C=C1)C1=CC=CC=C1	Bifonazole	Drugs	310.147	4.741
USAN00557	CN(C)CCN(C)N1C=C(C2=C1C=CC=C2)C1=CC=CC=C1	Binedaline	Drugs	293.189	5.347
USAN00558	CCN1C=C(C(O)=O)C(=O)C2=C1C=C(N1CCN3CCC1CC3)C(F)=C2	Binfloxacin	Drugs	359.165	-0.171
USAN00559	CC(C)(OC1=CC=C(Cl)C=C1)C(=O)OC(COC(=O)C1=CN=CC=C1)COC(=O)C1=CN=CC=C1	Binifibrate	Drugs	498.119	4.121
USAN00457	CCOP(=S)(OCC)SCC1=NC2=C(O1)C(Cl)=CC(Cl)=C2	Benoxafos	Drugs	384.953	5.648
USAN00560	CC(C)=CC1C(C(=O)OCC2=COC(CC3=CC=CC=C3)=C2)C1(C)C	Bioresmethrin	Drugs	338.188	6.577
USAN00562	NCC1=C(SC2=CC=CC=C2CO)C=CC=C1	Bipenamol	Drugs	245.087	2.394
USAN00563	OC(CCN1CCCCC1)(C1CC2CC1C=C2)C1=CC=CC=C1	Biperiden	Drugs	311.225	4.942
USAN00564	CCN(CC)CCOC(=O)C1=C(O)C(=CC=C1)C1=CC=CC=C1	Biphenamine	Drugs	313.168	5.066
USAN00565	FC1=CC=C(C=C1)C(=O)CCCN1CCN2CC3=C(CC2C1)C1=CC=CC=C1N3	Biriperone	Drugs	391.206	4.573
USAN00566	CC(=O)OC1=CC=C(C=C1)C(C1=CC=C(OC(C)=O)C=C1)C1=CC=CC=N1	Bisacodyl	Drugs	361.131	2.848
USAN00567	C1CN=C(NN=CC2=C3C=CC=CC3=C(C=NNC3=NCCN3)C3=C2C=CC=C3)N1	Bisantrene	Drugs	398.197	2.11
USAN00568	CC(SC(=S)NC1=CC=C(NC(=S)SC(C)C2=NC3=C(C=CC=C3)N2C)C=C1)C1=NC2=C(C=CC=C2)N1C	Bisbendazole	Drugs	576.126	5.514
USAN00569	CC(N(CC1=CN=C(C)N=C1N)C=O)=C(CCOC(=O)C1=CC=CC=C1)SSC(CCOC(=O)C1=CC=CC=C1)=C(C)N(CC1=C(N)N=C(C)N=C1)C=O	Bisbentiamine	Drugs	770.267	3.162
USAN00570	CC(C)C1=C(CNC2=C(C)N(C)N(C2=O)C2=CC=CC=C2)N(C)N(C1=O)C1=CC=CC=C1	Bisfenazone	Drugs	431.232	1.285
USAN00572	O[Bi]1OC2=CC(=CC(O)=C2O1)C(O)=O	Bismuth Subgallate	Drugs	393.989	-0.246
USAN00581	S=C=NC1=CC=C(C=C1)N=C=S	Bitoscanate	Drugs	191.982	4.768
USAN00678	CCCCNC(=N)NC(N)=N	Buformin	Drugs	157.133	-1.197
USAN00583	CNC1C(O)C(O)C(CO)OC1OC1C(OC2C(O)C(O)C(OC(N)=O)C(O)C2NC(N)=N)OC(C)C1(O)CO	Bluensomycin	Drugs	585.249	-3.966
USAN00584	CC1(C)OC2C(COC(=O)C3=CC=C(C=C3)N(=O)=O)OC(NC(=O)N(CCCl)N=O)C2O1	Bofumustine	Drugs	472.1	2.66616
USAN00585	CCOC(=O)C1CCC2C3CCC4(C)C(CCC4C3CCC2=C1)OC(=O)CC	Bolandiol Dipropionate	Drugs	388.261	6.102
USAN00587	CC1CC2(C)C(CCC3C4CCC(O)C4(C)CCC23)CC1=NN=C1CC2CCC3C4CCC(O)C4(C)CCC3C2(C)CC1C	Bolazine	Drugs	604.497	9.58
USAN00588	CC12CCC3C(CCC4=CC(=O)C=CC34C)C1CCC2OC(=O)CCCCCCCCC=C	Bodenone Undecylenate	Drugs	452.329	8.808
USAN00589	CCC1(O)CCC2C3CC=C4CCCCC4C3CCC12C	Bolenol	Drugs	288.245	6.087
USAN00590	CC12CCC3C(CCC4=CC(=O)CCC34)C1CCC2OC(=O)C12CC3CC(CC(C3)C1)C2	Bolmantalate	Drugs	436.298	6.495
USAN00591	COC1=CC=C(CCNCC(O)COC2=CC=C(OCC(C)=O)C3=C2CCC(=O)N3)C=C1OC	Bometolol	Drugs	472.221	1.185
USAN00593	CCN(CC)CCCOC(=O)C1(CC2CCC1C2)C1=CC=CC=C1	Bornaprine	Drugs	329.235	5.257
USAN00573	COC1=CC2=C(C=C1OC)C(CCCCC1NCCC3=CC(OC)=C(OC)C=C13)NCC2	Bisobrin	Drugs	440.268	3.908
USAN00594	CC(C)NCC(O)COC1=C(C=CC=C1)C1CC2CCC1C2	Bornaprolol	Drugs	303.22	4.074
USAN00595	CC(=O)C=CC=C1C2CCC(C2)C1(C)C	Bornelone	Drugs	204.151	4.055
USAN00596	CN(C)CCSC(=O)N1C2=C(C=CC=C2)C(C)(C)C2=C1C=CC=C2	Botiacrine	Drugs	340.161	5.063
USAN00597	FC(F)(F)C1=CC=C(C=C1)C1=CC=C(OCCN2CCCC2)C=C1	Boxidine	Drugs	335.15	5.655
USAN00598	BrC(=C)CC1(CC=C)C(=O)NC(=O)NC1=O	Brallobarbital	Drugs	285.995	1.088
USAN00599	CN1CC(COC(=O)N2CCCCCC2)CC2C1CC1=C(Br)NC3=CC=CC2=C13	Brazergoline	Drugs	459.152	5.95
USAN00600	CC(C)(CCC1=CC=CC=C1)NCC(O)C1=CC2=C(NC(=O)CC2)C=C1	Brefonalol	Drugs	352.215	2.917
USAN00601	CCC12CCN(CC3(O)CC3)C(CC3=C1C=C(O)C=C3)C2(C)C	Bremazocine	Drugs	315.22	3.821
USAN00602	CC1=C(C(=O)O[Na])C2=C(C=CC(F)=C2)N=C1C1=CC=C(C=C1)C1=CC=CC=C1F	Brequinar Sodium	Drugs	397.089	5.416
USAN00604	CC(ON=C1C2=C(C=NC=N2)C2=C1C(Br)=CC(Br)=C2)C(=O)NCCN(C)C	Brindoxime	Drugs	494.991	3.83
USAN00574	CC(C)NCC(O)COC1=CC=C(COCCOC(C)C)C=C1	Bisoprolol	Drugs	325.225	1.831
USAN00605	OCC1OC(CC1O)N1C=C(C=CBr)C(=O)NC1=O	Brivudine	Drugs	332.001	-0.817
USAN00606	CC1(C)SC2C(Br)C(=O)N2C1C(O)=O	Brobactam	Drugs	278.956	2.363
USAN00607	COC1=CC(N)=C(Br)C=C1C(=O)NC1CCN(CC2=CC=C(Cl)C=C2)CC1	Broclepride	Drugs	451.066	3.52
USAN00608	NOCC1=CC(O)=C(Br)C=C1	Brocresine	Drugs	216.974	0.928
USAN00609	OC(=O)COC1=C(Br)C2=C(C=C1)C(=NO2)C1=C(F)C=CC=C1	Brocrinat	Drugs	364.97	3.976
USAN00610	COC1=CC(CC2=CN=C(N)N=C2N)=CC(OC)=C1Br	Brodimoprim	Drugs	338.038	2.164
USAN00611	COC1=CC2=C(OC(=C2)C2CCNCC2)C(Br)=C1	Brofaromine	Drugs	309.036	3.825
USAN00612	CC(C(O)=O)C1=NC(=CS1)C1=CC=C(Br)C=C1	Brofezil	Drugs	310.962	3.035
USAN00613	CC1(C)OC(=O)NC2=C1C=C(Br)C=C2	Brofoxine	Drugs	254.989	2.358
USAN00614	BrC1=CC=C(C=C1)C(CN1C=CN=C1)C1=CC=CC=C1	Brolaconazole	Drugs	326.042	4.385
USAN00575	COC(=O)C1=CC=C(C=C1)C1(OC2=C(NC1=O)C=CC=C2)C1=CC=C(C=C1)C(=O)OC	Bisoxatin Acetate	Drugs	417.121	4.041
USAN00615	COC1=CC(Br)=C(OC)C=C1C(C)CN	Brolamfetamine	Drugs	273.036	2.144
USAN00616	BrCCC(=O)NCNC(=O)C=C	Bromacrylide	Drugs	234	-0.562
USAN00617	CN(C)C1CCCCC1NC(=O)C1=CC=C(Br)C=C1	Bromadoline	Drugs	324.084	3.738
USAN00618	CN(C)C(=O)CCNC1=CC=C(Br)C=C1	Bromamid	Drugs	270.037	2.408
USAN00620	ClC1=CC2=C(OC(=O)N2)C=C1Br	Bromchlorenone	Drugs	246.904	2.594
USAN00621	COC1=CC=C(C=C1)C(=O)C(Br)=CC(O)=O	Bromebric Acid	Drugs	283.968	2.672
USAN00622	CCN(CC)C(=O)NC1CN(C)C2CC3=C(Br)NC4=C3C(=CC=C4)C2=C1	Bromerguride	Drugs	416.121	3.759
USAN00623	C1N2CN3CN1CN(C2)C3	Brometenamine	Drugs	140.106	2.435
USAN00624	NC1=C(C=CC=C1CC(=O)O[Na])C(=O)C1=CC=C(Br)C=C1	Bromfenac Sodium	Drugs	354.982	3.198
USAN00625	CN(CC1=C(N)C(Br)=CC(Br)=C1)C1CCCCC1	Bromhexine	Drugs	373.999	4.884
USAN00576	O=N1=CC=CC=C1SSC1=N(=O)C=CC=C1	Bispyrithione	Drugs	252.003	0.866911
USAN00626	BrC1=CC=C(C=C1)C1C(=O)C2=C(C=CC=C2)C1=O	Bromindione	Drugs	299.979	3.673
USAN00627	CC(C)C(Br)C(=O)NC(N)=O	Bromisovalum	Drugs	222	1.176
USAN00628	ClC1=C(Cl)C2(Cl)C(CBr)CC1(Cl)C2(Cl)Cl	Bromociclen	Drugs	389.771	5.595
USAN00630	CN(C)CCOC(C1=CC=CC=C1)C1=CC=C(Br)C=C1	Bromodiphenhydramine	Drugs	333.073	4.315
USAN00631	OC1=C(Br)C=C(Br)C=C1C1=C(OP(O)(O)=O)C(Br)=CC(Br)=C1	Bromofenofos	Drugs	577.676	4.939
USAN00632	COP(=S)(OC)OC1=CC(Cl)=C(Br)C=C1Cl	Bromofos	Drugs	363.849	5.102
USAN00633	CCN(CC)CCNC(=O)C1=CC(Br)=C(N)C=C1OC	Bromopride	Drugs	343.09	2.429
USAN00634	CC1=C(C(=O)NC2=C(C=C(Br)C=C2)C(F)(F)F)C(O)=C(C=C1N(=O)=O)C(C)(C)C	Bromoxanide	Drugs	474.04	6.41251
USAN00635	OC1(CCN(CCCC(=O)C2=CC=C(F)C=C2)CC1)C1=CC=C(Br)C=C1	Bromperidol	Drugs	419.09	3.999
USAN00636	CN(C)CCC(C1=CC=C(Br)C=C1)C1=CC=CC=N1	Brompheniramine	Drugs	318.073	3.298
USAN00577	OC1=C(Cl)C=C(Cl)C=C1SC1=CC(Cl)=CC(Cl)=C1O	Bithionolate	Drugs	353.884	6.165
USAN00637	OCC(Br)(CO)N(=O)=O	Bronopol	Drugs	198.948	-0.178206
USAN00638	CCC1=CC=C(C=C1)C(=C(Br)C1=CC=CC=C1)C1=CC=CC=C1	Broparestrol	Drugs	362.067	7.243
USAN00639	BrC1=CC(=CC=C1)C1=NN(CCC(=O)N2CCCCC2)N=N1	Broperamole	Drugs	363.069	3.039
USAN00640	BrC1=C(NC(=N)NC1=O)C1=CC=CC=C1	Bropirimine	Drugs	264.985	1.315
USAN00641	CC1=NC2=C(C=C1)C(Br)=CC(Br)=C2O	Broquinaldol	Drugs	314.889	4.188
USAN00642	CC1=C(O)C(=CC(Br)=C1)C(N)=O	Brosotamide	Drugs	228.974	2.743
USAN00643	BrC1=CC=CC(=C1)C1CC(=O)NC1=O	Brosuximide	Drugs	252.974	1.249
USAN00644	CC(=O)OC1=C(Br)C=C(Cl)C=C1C#SNC1=CC=C(Br)C=C1	Brotianide	Drugs	460.849	5.678
USAN00645	CC1=NN=C2CN=C(C3=C(SC(Br)=C3)N12)C1=CC=CC=C1Cl	Brotizolam	Drugs	391.95	2.708
USAN00646	COC1=CC(=CC=C1OC(C)=O)C(=O)NC1=C(CN(C)C2CCCCC2)C=C(Br)C=C1Br	Brovanexine	Drugs	566.042	4.223
USAN00578	OC1=C(Cl)C=C(Cl)C=C1S(=O)C1=CC(Cl)=CC(Cl)=C1O	Bithionoloxide	Drugs	369.879	4.188
USAN00647	CCC12CCCN3CCC4=C(C13)N(C1=C4C=CC(Br)=C1)C(O)(C2)C(=O)OC	Brovincamine	Drugs	432.105	4.063
USAN00648	CC1=CC=C2C(Br)=CC(Br)=C(OC(=O)C3=CC=CC=C3)C2=N1	Broxaldine	Drugs	418.916	5.936
USAN00649	CC(C)(C)NCC(O)C1=CC(Br)=NO1	Broxaterol	Drugs	262.032	0.813
USAN00650	CC(=O)NC1=C(Br)C(C(=O)NCCO)=C(Br)C(C(O)=O)=C1Br	Broxitalamic Acid	Drugs	499.822	-0.257
USAN00651	OCC1OC(CC1O)N1C=C(Br)C(=O)NC1=O	Broxuridine	Drugs	305.985	-0.685
USAN00652	OC1=C(Br)C=C(Br)C2=CC=CN=C12	Broxyquinoline	Drugs	300.874	3.689
USAN00653	CCCCCCN1CCN(CC1)C(=NCC(C)C)C1=CC=CC=C1	Bucainide	Drugs	329.283	5.526
USAN00654	CCOC1=CC=C(NC(=O)CC(C)O)C=C1	Bucetin	Drugs	223.121	1.435
USAN00655	NC1=NC2=C(N=CN2CCC(O)CO)C(=O)N1	Buciclovir	Drugs	239.102	-2.729
USAN00656	CC(C)(S)C(=O)NC(CS)C(O)=O	Bucillamine	Drugs	223.034	0.358
USAN00579	CC(=NNS#CNCCN1CCCCC1)C(C)=NNS#CNCCN1CCCCC1	Bitipazone	Drugs	454.266	4.924
USAN00657	CC(C)(CC1=CNC2=C1C=CC=C2)NCC(O)COC1=C(C=CC=C1)C#N	Bucindolol	Drugs	363.195	3.294
USAN00658	CCCC(=O)NC1=NC=NC2=C1N=CN2C1OC2COP(O)(=O)OC2C1OC(=O)CCC	Bucladesine	Drugs	469.136	0.743
USAN00659	CC(C)(C)C1=CC=C(CN2CCN(CC2)C(C2=CC=CC=C2)C2=CC=C(Cl)C=C2)C=C1	Buclizine	Drugs	432.233	8.059
USAN00660	CCCCNC(=O)C1=C(O)C=C(Cl)C=C1	Buclosamide	Drugs	227.071	3.948
USAN00661	OC(=O)CCC(=O)C1=CC=C(C2CCCCC2)C(Cl)=C1	Bucloxic Acid	Drugs	294.102	4.663
USAN00662	CCCCC1C(=O)NC(=O)N(C2CCCCC2)C1=O	Bucolome	Drugs	266.163	3.092
USAN00663	CCCCNC1=C2CCCCC2=NC2=C1C=CC=C2	Bucricaine	Drugs	254.178	5.659
USAN00664	CCCCN(CCCC)CCCOC1=C(C)C=C(C=C1C)C(=O)C1=CC(=O)C2=C(O1)C=CC=C2	Bucromarone	Drugs	463.272	7.366
USAN00665	CC(C)COC(=O)C(=C)C#N	Bucrylate	Drugs	153.079	1.657
USAN00666	CC1=CC=C(OCC(O)CNC(C)(C)C)C2=C1C=CC(=O)O2	Bucumolol	Drugs	305.163	2.162
USAN00580	CC1=CC=C(C=C1)C(=O)OC1=CC=C(C=C1OC(=O)C1=CC=C(C)C=C1)C(O)CNC(C)(C)C	Bitolterol	Drugs	461.22	5.59
USAN00668	CC(C)(C)N1CCC(CC1)(C1=CC=CC=C1)C1=CC=CC=C1	Budipine	Drugs	293.214	5.584
USAN00669	CCO[Ti]123(OCC)OC(C)=CC(=[O]1)C1=CC=CC=C1.CC(C=C(O2)C1=CC=CC=C1)=[O]3	Budotitane (Structure ?)	Drugs	460.137	NaN
USAN00670	CC(C)=CC(C)=NNC1=NN=CC2=C1C=CC=C2	Budralazine	Drugs	240.137	2.36
USAN00671	CN(C)CCOC(C1=CC=CC=C1)C1=C(C=CC=C1)C(C)(C)C	Bufenadrine	Drugs	311.225	5.228
USAN00672	CC(CCC1=CC=CC=C1)NC(C)C(O)C1=CC(I)=C(O)C(I)=C1	Bufeniode	Drugs	550.982	4.953
USAN00673	CC(C)(C)NCC(O)COC1=C(OCC2CCCO2)C=CC=C1	Bufetolol	Drugs	323.21	2.082
USAN00674	CCCCOC1=CC=C(CC(=O)NO)C=C1	Bufexamac	Drugs	223.121	1.85
USAN00675	CC(C)CN1N=C(C(=C1CC(O)=O)C1=CC=CC=C1)C1=CC=CC=C1	Bufezolac	Drugs	334.168	4.072
USAN00676	COC1=CC(OC)=C(C(=O)CCCN2CCCC2)C(OC)=C1	Buflomedil	Drugs	307.178	2.934
USAN00677	CC12CCC3C(CCC4CC(O)CCC34C)C11OC1CC2C1=COC(=O)C=C1	Bufogenin	Drugs	384.23	3.142
USAN00679	CCCCC1=CC2=C(NC(=CC2=O)C(O)=O)C2=C1NC(=CC2=O)C(O)=O	Bufrolin	Drugs	356.101	0.283
USAN00688	CCCC(=O)NC1=C(I)C(C=C(CC)C(=O)O[Na])=C(I)C=C1I	Bunamiodyl Sodium	Drugs	660.808	4.496
USAN00794	CCCCCC(=NOCCN)C1=CC=C(C)C(N)=C1	Caproxamine	Drugs	263.2	3.715
USAN00689	CCCCC1=C(OC(C)=O)C2=C(C=CC=C2)C(OC)=C1	Bunaprolast	Drugs	272.141	4.84
USAN00690	CCCC(=O)N1CCCN(CC1)C1=NC2=C(C=C(OC)C(OC)=C2)C(N)=N1	Bunazosin	Drugs	373.211	2.098
USAN00691	CC(C)(C)NCC(O)COC1=CC=CC=C1C#N	Bunitrolol	Drugs	248.152	1.736
USAN00693	CC(C)(C)C1CCC(CC2=C(O)C(=O)C3=C(C=CC=C3)C2=O)CC1	Buparvaquone	Drugs	326.188	6.695
USAN00694	CCCCC1=CC=C(N=C1)C(N)=O	Bupicomide	Drugs	178.111	2.23
USAN00696	CC1=CC=C(Cl)C(OCC(O)CNC(C)(C)C)=C1	Bupranolol	Drugs	271.134	3.1
USAN00698	CC(NC(C)(C)C)C(=O)C1=CC=CC(Cl)=C1	Bupropion	Drugs	239.108	3.211
USAN00699	CCCCNC(=O)NC1CCN(CC1)C1=NC=NC2=C1C=C(OC)C(OC)=C2	Buquineran	Drugs	387.227	2.793
USAN00700	CCOC(=O)C1=C(O)C2=C(C=C(OCC(C)C)C(OCC(C)C)=C2)N=C1	Buquinolate	Drugs	361.189	6.491
USAN00680	CCC1=CC=CC2=C1OC(COCNC(C)(C)C)=C2	Bufuralol	Drugs	261.173	4.02
USAN00701	COC1=CC2=C(C=C1OC)C1=CC(NC(C)(C)C)=NC(=O)N1CC2	Buquiterine	Drugs	329.174	2.671
USAN00702	OCCOC(=O)NCC1=CC=CC=C1	Buramate	Drugs	195.09	0.992
USAN00703	CCCCOC1=C(OC)C=C(C=C1OC)C(=O)OCCN1CCCC1	Burodiline	Drugs	351.205	3.957
USAN00704	O=C1CC2(CCCC2)CC(=O)N1CCCCN1CCN(CC1)C1=NC=CC=N1	Buspirone	Drugs	385.248	2.185
USAN00706	CCCCN(CCCC)CCCOC(=O)C1=CC=C(N)C=C1	Butacaine	Drugs	306.231	5.007
USAN00707	CC(=O)NC1=CC=C(OC(C)(C)C)C=C1	Butacetin	Drugs	207.126	2.473
USAN00708	CC(C)(C)C1(O)CCN2CC3C4=C(CCC5=CC=CC(C2C1)=C35)C=CC=C4	Butaclamol	Drugs	361.241	4.945
USAN00709	CCCCC1=NN=C(NS(=O)(=O)C2=CC=C(Cl)C=C2)S1	Butadiazamide	Drugs	331.022	3.621
USAN00710	CCCCNC(C)(C)P(O)=O	Butafosfan	Drugs	179.108	0.14
USAN00711	CCCCN(CCCC)CCNC1=NC(=NO1)C1=CC=CC=C1	Butalamine	Drugs	316.226	5.776
USAN00681	CCCCC(C(O)=O)C(=O)N(NC1=CC=CC=C1)C1=CC=CC=C1	Bumadizone	Drugs	326.163	4.669
USAN00713	CCCCOC(=O)C1=CC=C(N)C=C1	Butamben	Drugs	193.11	2.981
USAN00714	CCC(C(=O)OCCOCCN(CC)CC)C1=CC=CC=C1	Butamirate	Drugs	307.215	4.079
USAN00715	CC(C)C(=O)NC1=CC(=CC=C1)C1CN2CCSC2=N1	Butamisole	Drugs	289.125	1.701
USAN00716	CCCCNCC1COC2=C(O1)C=CC=C2	Butamoxane	Drugs	221.142	3.066
USAN00717	CCCCNCC(=O)NC1=C(Cl)C=CC=C1C	Butanilicaine	Drugs	254.119	2.148
USAN00718	CCCCC1=CC=C(NC2=C(C=CC=N2)C(O)=O)C=C1	Butanixin	Drugs	270.137	6.019
USAN00719	FC1=CC=C(C=C1)C(=O)C1CCN(CCCCN2C(=O)NC3=C(C=CC=C3)C2=O)CC1	Butanserin	Drugs	423.196	3.436
USAN00720	CCCC(=O)C1C2=CC=CC(O)=C2C(=O)C2=C1C=CC=C2O	Butantrone	Drugs	296.105	3.811
USAN00721	CCCC(=O)C1=CC=C2SC3=C(C=CC=C3)N(CCCN3CCN(C)CC3)C2=C1	Butaperazine	Drugs	409.219	4.303
USAN00722	CCCC1(CCC1)C(O)CC=CC1C(O)CC(=O)C1CCCCCCC(=O)OC	Butaprost	Drugs	408.288	3.666
USAN00682	CCCCN1CCCC1C(=O)NC1=C(C)C=C(C)C=C1C	Bumecaine	Drugs	288.22	3.631
USAN00723	CCCCOC(=O)CC(N1CCCCC1)C1=CC=CC=C1	Butaverine	Drugs	289.204	4.813
USAN00724	OP(=O)(O[Na])C(C(CC(=O)O[Na])C(=O)O[Na])P(O)(=O)O[Na]	Butedronate Tetrasodium	Drugs	379.903	-4.054
USAN00725	OC(=O)CC(C(P(O)(O)=O)P(O)(O)=O)C(O)=O	Butedronic Acid	Drugs	291.975	-3.272
USAN00726	CCCCC1=NC2=C(C=CC(CN3CCN(CC3)C(C3=CC=CC=C3)C3=CC=CC=C3)=C2)N1CC	Buterizine	Drugs	466.31	7.344
USAN00727	CCC(C(=O)OCCN(CC)CC)C1=CC=CC=C1	Butetamate	Drugs	263.189	4.015
USAN00728	CC(C)CC1NC2=C(C=C(C(Cl)=C2)S(N)(=O)=O)S(=O)(=O)N1	Buthiazide	Drugs	353.027	1.611
USAN00729	CCC(C(O)=O)C1=CC=C(CC(C)C)C=C1	Butibufen	Drugs	220.146	4.208
USAN00730	CCC(C)NCC(O)C1=CC=C2CCCCC2=C1	Butidrine	Drugs	247.194	3.518
USAN00731	NCCC(O)CNC1CC(N)C(OC2OC(CN)C(O)C(O)C2O)C(O)C1OC1OC(CO)C(O)C(N)C1O	Butikacin	Drugs	571.306	-7.323
USAN00732	CCCCC1=CC=C(NC(=O)CN(CC(O)=O)CC(O)=O)C=C1	Butilfenin	Drugs	322.153	2.132
USAN00683	CC1=NC2=NC=NN2C2=C1CCN2C(C)(C)C	Bumepidil	Drugs	231.148	2.186
USAN00733	CC1(C)C2CC3=C(C=C(O)C=C3)C1(O)CCN2CCC#C	Butinazocine	Drugs	285.173	2.464
USAN00734	OC(C#CCN1CCCC1)(C1=CC=CC=C1)C1=CC=CC=C1	Butinoline	Drugs	291.162	3.95
USAN00735	NCCC(O)C(=O)NC1CC(N)C(OC2OC(CN)C(O)C(O)C2N)C(OC2OC(CO)C(O)C2O)C1O	Butirosin (B)	Drugs	555.275	-5.492
USAN00737	CCC(C(O)=O)C1=CC=C(C=C1)C1=CC=CC=C1	Xenbucin	Drugs	240.115	4.14
USAN00738	CCC(COC(=O)C1=CC(OC)=C(OC)C(OC)=C1)N(C)CCN(C)C(CC)COC(=O)C1=CC(OC)=C(OC)C(OC)=C1	Butobendine	Drugs	620.331	5.601
USAN00739	ClC1=CC=C(CCC(CN2C=CN=C2)SC2=C(Cl)C=CC=C2Cl)C=C1	Butoconazole	Drugs	410.018	6.865
USAN00740	CC1=CC(=O)C2=C(O1)C(OCC(O)CNC(C)(C)C)=C1OC=CC1=C2O	Butocrolol	Drugs	361.153	3.027
USAN00741	CCCCC(CC)CNC(=O)CC(C)O	Butoctamide	Drugs	215.189	2.477
USAN00742	CCCC(=O)C1=C(OCC(O)CNC(C)(C)C)C=CC(F)=C1	Butofilolol	Drugs	311.19	2.961
USAN00743	CCCC(=O)OC(C(Cl)(Cl)Cl)P(=O)(OC)OC	Butonate	Drugs	325.964	2.191
USAN00684	CCCCNC1=CC(=CC(=C1OC1=CC=CC=C1)S(N)(=O)=O)C(O)=O	Bumetanide	Drugs	364.109	3.372
USAN00744	CC(CCC1=CC=C(O)C=C1)NCC(O)C1=CC=C(O)C=C1	Butopamine	Drugs	301.168	2.03
USAN00745	CCCCOCCOC(=O)C(N1CCCCC1)C1=CC=CC=C1	Butopiprine	Drugs	319.215	4.59
USAN00746	CCCCN(CCCC)CCCOC1=CC=C(C=C1)C(=O)C1=C(CC)C=C2C=CC=CN12	Butoprozine	Drugs	434.293	8.568
USAN00748	OC1=CC=C2CC3N(CC4CCC4)CCC4(CCCCC34O)C2=C1	Butorphanol	Drugs	327.22	3.726
USAN00749	COC1=CC=C(OC)C(=C1)C(O)C(C)NC(C)(C)C	Butoxamine	Drugs	267.183	2.133
USAN00750	CCCCOC(=O)C1(CCN(CCC(C#N)(C2=CC=CC=C2)C2=CC=CC=C2)CC1)C1=CC=CC=C1	Butoxylate	Drugs	480.278	6.39
USAN00751	CC(CC1C2=CC=CC=C2CCC2=C1C=CC=C2)CN(C)C	Butriptyline	Drugs	293.214	5.554
USAN00753	COC1=CC=C(O)C(=C1)C(C)(C)C	Butylated Hydroxyanisole, 2-(tert-Butyl)-4-methoxyphenol.	Drugs	180.115	3.3
USAN00754	COC1=CC=C(O)C=C1C(C)(C)C	Butylated Hydroxyanisole, 3-(tert-Butyl)-4-methoxyphenol.	Drugs	180.115	3.4
USAN00755	COC1=CC=C(O)C(CC(C)C)=C1	Butylated Hydroxyanisole, 2(1,1-dimethylethyl)-4-methoxyphenol.	Drugs	180.115	3.48
USAN00685	CC1=CC(N2N=C3C=CC(Cl)=CC3=N2)=C(O)C(=C1)C(C)(C)C	Bumetrizole	Drugs	315.114	7.027
USAN00756	COC1=CC=C(O)C=C1CC(C)C	Butylated Hydroxyanisole, 3(1,1-dimethylethyl)-4-methoxyphenol.	Drugs	180.115	3.53
USAN00757	CC1=CC(=C(O)C(=C1)C(C)(C)C)C(C)(C)C	Butylated Hydroxytoluene	Drugs	220.183	5.426
USAN00758	CCCCOC(=O)C1=CC=C(O)C=C1	Butylparaben	Drugs	194.094	3.572
USAN00759	CN(C(C)(C)C)C(C)(C)C#C	Butynamine	Drugs	153.152	2.563
USAN00761	CC1CN(CCC1(C(O)=O)C1=CC=CC=C1)C1CCC(CC1)(C#N)C1=CC=C(F)C=C1	Cabastine	Drugs	420.221	1.856
USAN00762	CCNC(=O)N(CCCN(C)C)C(=O)C1CC2C(CC3=CNC4=C3C2=CC=C4)N(CC=C)C1	Cabergoline	Drugs	451.295	4.171
USAN00763	CCOC(=O)NNC1=NN=C(C=C1)N(CC)CC(C)O	Cadralazine	Drugs	283.164	0.932
USAN00764	CN(CCO)C1=NC2=C(N1C)C(=O)N(C)C(=O)N2C	Cafaminol	Drugs	267.133	-0.075
USAN00765	CC(NCCN1C=NC2=C1C(=O)N(C)C(=O)N2C)C(O)C1=CC=CC=C1	Cafedrine	Drugs	357.18	0.899
USAN00769	OC(=O)CC(O)(CC(O)=O)C(O)=O	Citric Acid	Drugs	192.027	-1.998
USAN00686	CCCCN(CCN(CC)CC)C(=O)C1=CC=CC2=C1C=CC=C2	Bunaftine	Drugs	326.236	5.099
USAN00770	CC(C)(OC1=CC=C(Cl)C=C1)C(O)=O	Clofibrate Acid	Drugs	214.04	2.821
USAN00771	OC1=CC=C(O)C(=C1)S(O)(=O)=O	Dobesilate Acid	Drugs	189.994	-1.979
USAN00772	OCC(O)C(O)C(O)C(O)C(O)C(O)=O	Gluceptate Acid	Drugs	226.069	-3.275
USAN00773	OCC(O)C(O)C(O)C(O)C(O)=O	Gluconic Acid	Drugs	196.058	-3.106
USAN00774	CC(O)C(O)=O	Latate Acid	Drugs	90.0317	-0.734
USAN00775	OCC(O)C(OC1OC(CO)C(O)C(O)C1O)C(O)C(O)C(O)=O	Lactobionate Acid	Drugs	358.111	-4.63
USAN00776	CC(=O)CCC(O)=O	Levulinate Acid	Drugs	116.047	-0.339
USAN00777	CC(C)(CO)C(O)C(=O)NCCC(O)=O	Pantothenic Acid	Drugs	219.111	-1.494
USAN00778	OC(C(O)C(O)C(O)=O)C(O)C(O)=O	Saccharate Acid	Drugs	210.038	-4.165
USAN00780	CN(C)C(=O)OC1N=C(C2=CC=CC=C2)C2=C(C=CC(Cl)=C2)N(C)C1=O	Camazepam	Drugs	371.104	3.443
USAN00687	CCCCCCOC1=CC=C(C(=N)N(CCCC)CCCC)C2=C1C=CC=C2	Buanamidine	Drugs	382.298	8.725
USAN00781	CC(C)OC(=O)NC1=CC2=C(NC(=N2)C2=CSC=N2)C=C1	Cambendazole	Drugs	302.084	3.171
USAN00782	CC(C)CCOC(=O)C(NCCN1CCCC1)C1=CC=CC=C1	Camiverine	Drugs	318.231	4.31
USAN00783	CN(C)C(=O)COC(=O)CC1=CC=C(OC(=O)C2=CC=C(NC(N)=N)C=C2)C=C1	Camostat	Drugs	398.159	1.659
USAN00784	CC1(C)C2CCC1(C)C(=O)C2	Camphor	Drugs	152.12	2.177
USAN00787	CCN(CC)CCNC1=CC=C(CC(=O)OCCC(C)C)C=C1	Camylofin	Drugs	320.246	4.571
USAN00788	CCCCCCC(C)(C)C1=CC(O)=C2C3CC(O)CCC3C(C)(C)OC2=C1	Canbisol	Drugs	374.282	6.972
USAN00789	CCCCCC1=CC2=C(C(O)=C1)C1=C(C=CC(C)=C1)C(C)(C)O2	Cannabinol	Drugs	310.193	7.39
USAN00790	CC12CCC3C(C=CC4=CC(=O)CCC34C)C1CCC2(O)CCC(O)=O	Canrenoate Acid	Drugs	358.214	3.158
USAN00791	CC12CCC3C(C=CC4=CC(=O)CCC34C)C1CCC21CCC(=O)O1	Canrenone	Drugs	340.204	2.906
USAN00792	COC1=CC(=CC(OC)=C1OC)C(=O)NCCCCCC(O)=O	Capobenic Acid	Drugs	325.153	1.045
USAN00795	CN(C)CCS	Captamine	Drugs	105.061	0.646
USAN00805	NC(N)=O	Carbamide	Drugs	60.0324	-1.66
USAN00922	CON=C(C(=O)NC1C2SCC(COC(N)=O)=C(N2C1=O)C(=O)OC(C)OC(C)=O)C1=CC=CO1	Cefuroxime Axetil	Drugs	510.106	0.654
USAN00806	CCCCC(=N)NC(=O)NC1=CC=C(Cl)C=C1	Carbantel	Drugs	253.098	2.781
USAN00807	CNC(=O)OC1=CC=CC2=C1C=CC=C2	Carbaril	Drugs	201.079	2.385
USAN00808	NC(=O)NC1=CC=C(C=C1)[As](O)(O)=O	Carbarsone	Drugs	259.978	-1.242
USAN00810	CCNC(=O)OC1CCN(CC1)C1=NN=CC2=C1C=C(OC)C(OC)=C2	Carbazeran	Drugs	360.18	1.834
USAN00811	CN1CC(O)C2=CC(=NNC(N)=O)C(=O)C=C12	Carbazochrome	Drugs	236.091	0.527
USAN00812	C(C1CC1)N1CCC23CCCCC2C1CC1=C3NC2=C1C=CC=C2	Carbazocine	Drugs	320.225	4.989
USAN00813	CC1(C)SC2C(NC(=O)C(C(O)=O)C3=CC=CC=C3)C(=O)N2C1C(O)=O	Carbenicillin Acid	Drugs	378.089	1.637
USAN00814	CC1(C)SC2C(NC(=O)C(C(=O)OC3=C4CCCC4=CC=C3)C3=CC=CC=C3)C(=O)N2C1C(O)=O	Carbenicillin Phenyl Acid	Drugs	494.151	4.179
USAN00815	CC1(C)C(CCC2(C)C1CCC1(C)C2C(=O)C=C2C3CC(C)(CCC3(C)CCC12C)C(O)=O)OC(=O)CCC(O)=O	Carbenoxolone Acid	Drugs	570.356	7.191
USAN00796	CCCCSC1=CC=C(C=C1)C(SCCN(C)C)C1=CC=CC=C1	Captodiame	Drugs	359.174	6.405
USAN00816	CCOC(=O)NNC(C)C1=CC=CC=C1	Carbenzide	Drugs	208.121	1.388
USAN00817	CCN(CC)CCOCCOC(=O)C1(CCCC1)C1=CC=CC=C1	Carbetapentane	Drugs	333.23	4.703
USAN00818	CC(C1C(CCC(C(CCC(CC(O)=O)C(N)=O)C(O)=O)C(N)=O)C(=O)NC1=O)C1=CC=CC=C1	Carbetimer	Drugs	489.211	-1.041
USAN00819	CCC(C)C1NC(=O)C(CC2=CC=C(OC)C=C2)NC(=O)CCCC(CS)(NC(=O)C(CC(N)=O)NNC(CCC(N)=O)C(=O)C1=O)C(=O)N1CCCC1C(=O)NC(CC(C)C)C(=O)NCC(N)=O	Carbetocin	Drugs	987.485	0.628
USAN00820	CC(CC1=CC=C(O)C(O)=C1)(NN)C(O)=O	Carbidopa	Drugs	226.095	-0.445
USAN00823	CCOC(C(=O)N(C)CCN(C)CCC1=CC=CC=C1)(C1=CC=CC=C1)C1=CC=CC=C1	Carbiphene	Drugs	430.262	5.851
USAN00824	CCOC(=O)NC(O)C(Cl)(Cl)Cl	Carbocloral	Drugs	234.957	1.913
USAN00825	NC(CSCC(O)=O)C(O)=O	Carbocysteine	Drugs	179.025	-2.608
USAN00826	CCOP(=S)(OCC)SCSC1=CC=C(Cl)C=C1	Carbofenotion	Drugs	341.974	5.943
USAN00827	ClC(Cl)(Cl)Cl	Carbon tetrachloride	Drugs	151.875	2.875
USAN00798	CCC(C)C(CC)C(=O)NC(N)=O	Capuride	Drugs	186.137	1.79
USAN00828	N[Pt]1(N)OC(=O)C2(CCC2)C(=O)O1	Carboplatin (?Formula)	Drugs	369.029	-2.338
USAN00830	COC(COC(N)=O)C1=C(N2CC2)C(=O)C(C)=C(N2CC2)C1=O	Carboquone	Drugs	321.132	-0.314
USAN00831	CCC(Br)(CC)C(=O)NC(N)=O	Carbromal	Drugs	236.016	1.615
USAN00832	CCCCC1(CCOC(N)=O)C(=O)NC(=O)NC1=O	Carbubarb	Drugs	271.117	-0.214
USAN00833	CN1C2=C(C=C(Cl)C=C2)C(N(CC1=O)C(N)=O)C1=CC=CC=C1	Carburazepam	Drugs	329.093	2.3
USAN00834	CCCCNC(=O)NS(=O)(=O)C1=CC=C(N)C=C1	Carbutamide	Drugs	271.099	1.021
USAN00835	CC(C)(C)NCC(O)C1=CC=C(O)C(NC(N)=O)=C1	Carbuterol	Drugs	267.158	-0.148
USAN00837	CC(C)(C(O)=O)C1=CC=C(C=C1)C(=O)CCCN1CCC(CC1)OC(C1=CC=CC=C1)C1=CC=CC=C1	Carebastine	Drugs	499.272	2.826
USAN00838	CCC(=O)N(C1=CC=CC=C1)C1(CCN(CCC2=CC=CC=C2)CC1)C(=O)OC	Carfentanil	Drugs	394.226	3.686
USAN00839	NC(=O)OC(C#C)C1=CC=CC=C1	Carfimate	Drugs	175.063	1.584
USAN00799	CNC(=O)ON(C(C)=O)C(=O)NC	Caracemide	Drugs	189.075	-0.618
USAN00840	CCC(C)C1NNC(CCC(N)=O)C(=O)NC(CC(N)=O)C(=O)NC(CCCCCC(=O)C(=O)C(CC2=CC=C(O)C=C2)NC1=O)C(=O)NCC(=O)NC(CC(C)C)C(=O)NCC(N)=O	Cargutocin	Drugs	915.481	-0.361
USAN00842	OC(=O)C1CCN1C12CC3CC(CC(C3)C1)C2	Carmantadine	Drugs	235.157	0.473
USAN00843	COC(=O)C1NC2=C(C=C(C(Cl)=C2)S(N)(=O)=O)S(=O)(=O)N1C	Carmetizide	Drugs	368.986	0.346
USAN00844	CCCCCCNC(=O)N1C=C(F)C(=O)NC1=O	Carmofur	Drugs	257.118	2.546
USAN00846	COC(=S)NCCN1C(C)=NC=C1N(=O)=O	Carnidazole	Drugs	244.063	0.770139
USAN00848	CNC(=O)NC1=C(OC)C2=C(OC=C2)C(OC)=C1OCCN1CCCC1	Carocainide	Drugs	363.179	2.186
USAN00849	CCN(CC)CCN1C(=O)C(CC2=CC=C(OC)C=C2)=NC2=C1C=CC=C2	Caroverine	Drugs	365.21	4.11
USAN00850	NC(=O)CN1CC2=C(OC1=O)C=CC=C2	Caroxazone	Drugs	206.069	0.199
USAN00851	CCOC(=O)C1(CCN(CCC(N)=O)CC1)C1=CC=CC=C1	Carperidine	Drugs	304.179	1.422
USAN00852	CC(C)NC(=O)OC1CCN(CCCC(=O)C2=CC=C(F)C=C2)CC1	Carperone	Drugs	350.201	2.722
USAN00800	CCN(CC)CCOC(=O)C1(CCCC1)C1=CC=CC=C1	Caramiphen	Drugs	289.204	4.639
USAN00853	CCC(=O)C1=CC=C2SC3=CC=CC=C3N(CCCN3CCN(CCO)CC3)C2=C1	Carphenazine	Drugs	425.214	3.238
USAN00854	CC(C)OC(=O)C1=CC2=C(N1)C=CC=C2OCC(O)CNC(C)(C)C	Carpindolol	Drugs	348.205	3.276
USAN00855	NC(=O)C1(CCN(CCCN2C3=CC=CC=C3CCC3=C2C=CC=C3)CC1)N1CCCCC1	Carpipramine	Drugs	446.305	4.964
USAN00856	COC(=O)NC1=CC(=NC2=NC(=O)ON12)N1CCC=CC1	Carprazidil	Drugs	291.097	-1.122
USAN00857	CC(C(O)=O)C1=CC=C2C(NC3=C2C=C(Cl)C=C3)=C1	Carprofen	Drugs	273.056	3.978
USAN00859	O=C1NC(=O)C2=C(O1)C=CC=C2	Carsalam	Drugs	163.027	-0.295
USAN00860	CCCCNC1=C(C=NC2=C1C=NN2CC)C(=O)OCC	Cartazolate	Drugs	290.174	4.289
USAN00862	CC1OC(CC(N)C1O)OC1CC(O)(CC2=C1C(O)=C1C(=O)C3=C(C=CC=C3O)C(=O)C1=C2O)C(C)=O	Carubicin	Drugs	513.163	0.744
USAN00863	NC(=O)OCC1C(NC(=O)C(=NOCC(O)=O)C2=CSC(N)=N2)C(=O)N1S(O)(=O)=O	Carumonam Acid	Drugs	466.021	-1.246
USAN00864	COC1=CC=CC=C1OCCNCC(O)COC1=C2C(NC3=C2C=CC=C3)=CC=C1	Carvedilol	Drugs	406.189	4.041
USAN00801	CC(C)NCC(O)COC1=CC=CC2=C1C1=C(N2)C=CC=C1	Carazolol	Drugs	298.168	3.055
USAN00865	NS(=O)(=O)C1=CC=C(C=C1)C(O)=O	Carzenide	Drugs	201.01	0.452
USAN00868	NC(C(=O)NC1C2SCC(Cl)=C(N2C1=O)C(O)=O)C1=CC=CC=C1	Cefaclor	Drugs	367.039	-1.636
USAN00870	NC(=O)C1=CC=[N+](CC2=C(N3C(SC2)C(NC(=O)CC2=CC=CS2)C3=O)C([O-])=O)C=C1	Csfalonium	Drugs	458.072	-4.009
USAN00871	CC(=O)COC1=C(N2C(SC1)C(NC(=O)CC1=CC=CC=C1)C2=O)C(O)=O	Cefaloram	Drugs	390.089	0.291
USAN00872	CN1N=NN=C1SCC1=C(N2C(SC1)C(NC(=O)C(O)C1=CC=CC=C1)C2=O)C(O)=O	Cefamandole	Drugs	462.078	0.111
USAN00873	CN1N=NN=C1SCC1=C(N2C(SC1)C(NC(=O)C(OC=O)C1=CC=CC=C1)C2=O)C(O)=O	Cefamandole Nafate Acid	Drugs	490.073	-0.002
USAN00874	CC1=NN=C(SCC2=C(N3C(SC2)C(NC(=O)C(N)C2=CC=C(O)C=C2)C3=O)C(O)=O)S1	Cefaparole	Drugs	493.055	-3.001
USAN00875	NC(C(=O)NC1C2SCC(CSC3=CNN=N3)=C(N2C1=O)C(O)=O)C1=CC=C(O)C=C1	Cefatrizine	Drugs	462.078	-3.088
USAN00876	CN1N=NN=C1SCC1=C(N2C(SC1)C(NC(=O)CSC(F)(F)F)C2=O)C(O)=O	Cefazaflur	Drugs	470.011	0.545
USAN00877	CC1=NN=C(SCC2=C(N3C(SC2)C(NC(=O)CN2C=C(Cl)C(=O)C(Cl)=C2)C3=O)C(O)=O)S1	Cefazedone	Drugs	546.961	-0.896
USAN00802	COC(=O)NN=CC1=N(=O)C2=C(C=CC=C2)N(=O)=C1	Carbadox	Drugs	262.07	-0.978199
USAN00879	CCN1CCN(C(=O)NC(C(C)O)C(=O)NC2(OC)C3SCC(CSC4=NN=NN4C)=C(N3C2=O)C(O)=O)C(=O)C1=O	Cefbuperazone	Drugs	627.153	-0.804
USAN00880	CC1=NN=C(SCC2=C(N3C(SC2)C(NC(=O)C(O)C2=CC=CC=C2)C3=O)C(O)=O)S1	Cefcanel	Drugs	478.044	0.328
USAN00881	CC(N)C(=O)OC(C(=O)NC1C2SCC(CSC3=NN=C(C)S3)=C(N2C1=O)C(=O)OCC1=C(C)OC(=O)O1)C1=CC=CC=C1	Cefcanel Daloxate	Drugs	661.097	0
USAN00882	CC1=C(N2C(SC1)C(NC(=O)C(N)C1=CC(Cl)=C(O)C=C1)C2=O)C(O)=O	Cefedrolor	Drugs	397.05	-1.827
USAN00883	NC1=NC=C(S1)C(=NOC1CCNC1=O)C(=O)NC1C2SCC(C[N+]3=CC=CC=C3)=C(N2C1=O)C([O-])=O	Cefempidone	Drugs	543.099	-3.682
USAN00885	CON=C(C(=O)NC1C2SCC(C)=C(N2C1=O)C(O)=O)C1=CSC(N)=N1	Cefetamet	Drugs	397.051	0.863
USAN00886	OC(=O)C1=C(CSC2=NNC=N2)CSC2C(NC(=O)CC3=CC=CS3)C(=O)N12	Cefetrizole	Drugs	437.029	0.511
USAN00887	CN1N=NN=C1SCC1=C(N2C(SC1)C(NC(=O)CSC=CC#N)C2=O)C(O)=O	Cefivitril	Drugs	453.035	-1.103
USAN00893	CON=C(C(=O)NC1C2SCC(CSC3=NC(C)=C(CC(O)=O)S3)=C(N2C1=O)C(O)=O)C1=CSC(N)=N1	Cefodizime	Drugs	584.028	1.1
USAN00894	OC(C(=O)NC1C2SCC(CSC3=NN=NN3CS(O)(=O)=O)=C(N2C1=O)C(O)=O)C1=CC=CC=C1	Cefonicid	Drugs	542.035	-1.919
USAN00803	O[Al](O)OC(O)=O	Carbaldric Acid	Drugs	121.98	-2.174
USAN00895	CCN1CCN(C(=O)NC(C(=O)NC2C3SCC(CSC4=NN=NN4C)=C(N3C2=O)C(O)=O)C2=CC=C(O)C=C2)C(=O)C1=O	Cefoperazone	Drugs	645.142	-0.216
USAN00900	CC(=O)OCC1=C(N2C(SC1)C(NC(=O)C1=C(C)ON=C1C1=CC=CC=C1Cl)C2=O)C(O)=O	Cefoxazole	Drugs	491.055	0.84
USAN00902	OC(=O)C1=C(N=CN1)C(=O)NC(C(=O)NC1C2SCC(C[N+]3=CC=C(CCS([O-])(=O)=O)C=C3)=C(N2C1=O)C(O)=O)C1=CC=CC=C1	Cefpimizole	Drugs	670.115	-6.52
USAN00903	CN1N=NN=C1SCC1=C(N2C(SC1)C(NC(=O)C(NC(=O)C1=CN=C(C)C=C1O)C1=CC=C(O)C=C1)C2=O)C(O)=O	Cefpiramide	Drugs	612.121	1.942
USAN00904	CON=C(C(=O)NC1C2SCC(C[N+]3=CC=CC4=C3CCC4)=C(N2C1=O)C([O-])=O)C1=CSC(N)=N1	Cefpirome	Drugs	514.109	-1.167
USAN00905	COCC1=C(N2C(SC1)C(NC(=O)C(=NOC)C1=CSC(N)=N1)C2=O)C(=O)OC(C)OC(=O)OC(C)C	Cefpodoxime Proxetil	Drugs	557.125	0.801
USAN00906	CON=C(C(=O)NC1C2SCC(C[N+]3=CC=CC4=C3CCCC4)=C(N2C1=O)C([O-])=O)C1=CSC(N)=N1	Cefquinome	Drugs	528.125	-0.608
USAN00907	CC1=C(N2C(SC1)C(NC(=O)CC1=CC=C(C=C1)C1=NCCCN1)C2=O)C(O)=O	Cefrotil	Drugs	414.136	2.172
USAN00908	COC1=C(N2C(SC1)C(NC(=O)C(N)C1=CCC=CC1)C2=O)C(O)=O	Cefroxadine	Drugs	365.105	-1.95
USAN00909	NC(=O)C1=CC=[N+](CC2=C(N3C(SC2)C(NC(=O)C(C2=CC=CC=C2)S(O)(=O)=O)C3=O)C([O-])=O)C=C1	Cefsulodin	Drugs	532.072	-5.527
USAN00804	NC(=O)N1C2=CC=CC=C2C=CC2=C1C=CC=C2	Carbamazepine	Drugs	236.095	2.38
USAN00910	CC1=C(N2C(SC1)C(NC(=O)C(N)C1=CC(NS(C)(=O)=O)=CC=C1)C2=O)C(O)=O	Cefsumide	Drugs	440.082	-3.031
USAN00911	CC(C)(ON=C(C(=O)NC1C2SCC(C[N+]3=CC=CC=C3)=C(N2C1=O)C([O-])=O)C1=CSC(N)=N1)C(O)=O	Ceftazidime	Drugs	546.099	-2.495
USAN00912	CON=C(C(=O)NC1C2SCC(CN3N=NC(C)=N3)=C(N2C1=O)C(O)=O)C1=CSC(N)=N1	Cefteram	Drugs	479.079	-0.043
USAN00913	OC(=O)C1=C(CSC2=NN=CS2)CSC2C(NC(=O)CN3C=NN=N3)C(=O)N12	Ceftezole	Drugs	440.014	-1.586
USAN00915	CON=C(C(=O)NC1C2SCC(CSC(=O)C3=CC=CO3)=C(N2C1=O)C(O)=O)C1=CSC(N)=N1	Ceftiofur	Drugs	523.029	1.167
USAN00916	CON=C(C(=O)NC1C2SCC(C=CSC3=NNC(=O)C(=O)N3CC=O)=C(N2C1=O)C(O)=O)C1=CSC(N)=N1	Ceftiolene	Drugs	594.041	-0.167
USAN00917	CON=C(C(=O)NC1C2N(C1=O)C(C(O)=O)=C(COC(C)=O)CS2=O)C1=CSC(N)=N1	Ceftioxide	Drugs	471.052	-1.749
USAN00918	CON=C(C(=O)NC1C2SCC=C(N2C1=O)C(O)=O)C1=CSC(=N)N1	Ceftizoxime	Drugs	383.036	0.391
USAN00919	CON=C(C(=O)NC1C2SCC(CSC3=NC(=O)C(=O)N([Na])N3C)=C(N2C1=O)C(O)=O)C1=CSC(N)=N1	Ceftriaxone	Drugs	576.028	-1.196
USAN00920	CON=C(C(=O)NC1C2SCC(COC(C)=O)=C(N2C1=O)C(O)=O)C1=CC=CO1	Cefuracetime	Drugs	423.074	1.095
USAN00923	CON=C(C(=O)NC1C2SCC(CSC3=CN=NS3)=C(N2C1=O)C(O)=O)C1=CSC(N)=N1	Cefuzonam	Drugs	513.002	0.323
USAN00939	CC(=O)C1=C(O)C(N)C2CC3=C(C)C4=C(C(O)=C(C)C=C4)C(O)=C3C(=O)C2(O)C1=O	Cetocycline	Drugs	411.132	0.72
USAN01050	CC(C)C(O)C1CCCCC1	Cimepanol	Drugs	156.151	3.123
USAN00940	CC1=NNC(=O)C(C)=C1	Cetohexazine	Drugs	124.064	-0.231
USAN00941	CC(=O)C1=CC=C(C=C1)C(O)C(CO)NC(=O)C(Cl)Cl	Cetophenicol	Drugs	319.038	0.979
USAN00942	CCOC(=O)OCCC(SC(=O)OCC)=C(C)N(CC1=C(N)N=C(C)N=C1)C=O	Cetotiamine	Drugs	426.157	1.554
USAN00943	NC(CN(CC1=CC=CC=C1)C1=CC=CC=C1)=NO	Cetoxime	Drugs	255.137	3.147
USAN00944	NCC1CCC(CC1)C(=O)OC1=CC=C(CCC(O)=O)C=C1	Cetraxate	Drugs	305.163	-0.355
USAN00947	O=C(CCCCCCCCCCCCC1CCCC1)NC1=CC=C(C=C1)S(=O)(=O)C1=CC=C(NC(=O)CCCCCCCCCCCCC2CCCC2)C=C1	Chaulmosulfone	Drugs	776.553	17.125
USAN00949	OC1=C(I)C=C(C2=C1N=CC=C2)S(O)(=O)=O	Chiniofon	Drugs	350.906	0.186
USAN00950	CN(C)CCC(O)(C1=CC=CC=C1)C1=CC=CC=C1Cl	Chlophedianol	Drugs	289.123	3.63
USAN00951	CCN(CC)CCC(=O)N1C2=CC(Cl)=CC=C2SC2=C1C=CC=C2	Chloracyzine	Drugs	360.106	4.498
USAN00924	CCN(CC)C(=O)NC1=CC=C(OCC(O)CNC(C)(C)C)C(=C1)C(C)=O	Celiprolol	Drugs	379.247	1.856
USAN00952	OCC(O)C1OC2OC(OC2C1O)C(Cl)(Cl)Cl	Chloralose	Drugs	307.962	0.409
USAN00953	OC(=O)CCCC1=CC=C(C=C1)N(CCCl)CCCl	Chlorambucil	Drugs	303.079	3.631
USAN00954	CC1=CC=C(C=C1)S(=O)(=O)N([Na])Cl	Chloramine-T	Drugs	226.978	1.669
USAN00955	OCC(NC(=O)C(Cl)Cl)C(O)C1=CC=C(C=C1)N(=O)=O	Chloramphenicol	Drugs	322.012	0.910535
USAN00956	NC1=NC(NC2=CC=C(Cl)C=C2)=NC=N1	Chlorazanil	Drugs	221.047	2.478
USAN00957	CC1=CC=CC=C1CN1CCN(CCOC(C2=CC=CC=C2)C2=CC=CC=C2Cl)CC1	Chlorbenzoxamine	Drugs	434.212	6.814
USAN00958	OCCN(CC1=CC=C(Cl)C=C1Cl)C(=O)C(Cl)Cl	Chlorbetamide	Drugs	328.954	3.464
USAN00959	CN1CCN(CC1)C(C1=CC=CC=C1)C1=CC=C(Cl)C=C1	Chlorcylizine	Drugs	300.139	4.511
USAN00960	CCCCC(CC)C1NC(=O)N(SC(Cl)(Cl)Cl)C1=O	Chlordantoin	Drugs	346.008	5.358
USAN00961	CNC1=NC2=C(C=C(Cl)C=C2)C(C2=CC=CC=C2)=N(=O)C1	Chlordiazepoxide	Drugs	299.083	3.19985
USAN00926	CC1=C(N2C(SC1)C(NC(=O)C(N)C1=CC=CC=C1)C2=O)C(O)=O	Cephalexin	Drugs	347.094	-1.84
USAN00962	ClC1=CC(=CC=C1OCCCN1CCOCC1)C1=CC=CC=C1	Chlordimorine	Drugs	331.134	4.996
USAN00965	OC1=CC=C(Cl)C2=C1CCC2	Chlorindanol	Drugs	168.034	3.498
USAN00967	CC(=O)OC1(CCC2C3C=C(Cl)C4=CC(=O)CCC4(C)C3CCC12C)C(C)=O	Chlormadinone Acetate	Drugs	404.175	3.976
USAN00969	CN1C(C2=CC=C(Cl)C=C2)S(=O)(=O)CCC1=O	Chlormezanone	Drugs	273.023	1.575
USAN00970	CC1=NC2=C(C=CC=C2)N1CC1=CC=C(Cl)C=C1	Chlormidazole	Drugs	256.077	4.081
USAN00971	ClCCN(CCCl)C1=CC2=C(C=CC=C2)C=C1	Chlornaphazine	Drugs	267.058	4.665
USAN00972	NC(=NCl)N=NC(N)=NCl	Chloroazodin	Drugs	181.987	0.658
USAN00973	CC1=CC(O)=CC=C1Cl	Chlorocresol	Drugs	142.019	2.984
USAN00974	CC(C)NC(=N)NC(=N)NC1=CC=C(Cl)C=C1	Chloroguanide	Drugs	253.109	2.532
USAN00975	ClC1=CC=C(C=C1)C(C1=CC=C(Cl)C=C1)C(Cl)(Cl)Cl	Chlorophenothane	Drugs	351.915	6.763
USAN00927	CC(=O)OCC1=C(N2C(SC1)C(NC(=O)C(N)C1=CC=CC=C1)C2=O)C(O)=O	Cephaloglycin	Drugs	405.099	-2.881
USAN00976	CC(=O)OCC(=O)C1(O)CCC2C3CC(Cl)C4=CC(=O)C=CC4(C)C3C(=O)CC12C	Chloroprednisone Acetate	Drugs	434.15	2.181
USAN00977	CCN(CC)CCOC(=O)C1=CC=C(N)C=C1Cl	Chloroprocaine	Drugs	270.114	2.909
USAN00978	CN(C)CCN(CC1=CC=C(Cl)C=C1)C1=NC=CC=C1	Chloropyramine	Drugs	289.135	4.019
USAN00979	CCN(CC)CCCC(C)NC1=CC=NC2=C1C=CC(Cl)=C2	Chloroquine	Drugs	319.182	5.06
USAN00980	COC1C(CC2CN3CCC4=C(NC5=C4C=C(Cl)C=C5)C3CC2C1C(=O)OC)OC(=O)C1=CC(OC)=C(OC)C(OC)=C1	Chloroserpidine	Drugs	612.224	4.719
USAN00981	CN(C)CCN(CC1=CC=C(Cl)S1)C1=NC=CC=C1	Chlorothen	Drugs	295.091	3.707
USAN00982	NS(=O)(=O)C1=CC2=C(C=C1Cl)N=CNS2(=O)=O	Chlorothiazide	Drugs	294.949	-0.294
USAN00983	COC1=CC=C(C=C1)C(Cl)=C(C1=CC=C(OC)C=C1)C1=CC=C(OC)C=C1	Chlorotrianisene	Drugs	380.118	5.832
USAN00985	CC1=CC(O)=CC(C)=C1Cl	Chloroxylenol	Drugs	156.034	3.483
USAN00986	NC(=O)OCC(O)COC1=CC=C(Cl)C=C1	Chlorphenesin Carbamate	Drugs	245.045	1.26
USAN00928	[O-]C(=O)C1=C(C[N+]2=CC=CC=C2)CSC2C(NC(=O)CC3=CC=CS3)C(=O)N12	Cephaloridine	Drugs	415.066	-2.502
USAN00990	CN(C)CCOC(C)(C1=CC=CC=C1)C1=CC=C(Cl)C=C1	Chlorphenoxamine	Drugs	303.139	4.564
USAN00992	CCN(CC)CCCN1C2=CC(Cl)=CC=C2SC2=C1C=CC=C2	Chlorproethazine	Drugs	346.127	6.358
USAN00993	CC(C)NC(=N)NC(=N)NC1=CC(Cl)=C(Cl)C=C1	Chlorproguanil	Drugs	287.07	3.223
USAN00994	CN(C)CCCN1C2=CC(Cl)=CC=C2SC2=C1C=CC=C2	Chlorpromazine	Drugs	318.096	5.3
USAN00996	CN(C)CCC=C1C2=CC(Cl)=CC=C2SC2=C1C=CC=C2	Chlorprothixene	Drugs	315.085	5.482
USAN00997	CC1=NC2=C(C=C1)C(Cl)=CC(Cl)=C2O	Chlorquinaldol	Drugs	226.99	3.838
USAN00998	CN(C)C1C2CC3C(=C(O)C2(O)C(=O)C(C(N)=O)=C1O)C(=O)C1=C(C(Cl)=CC=C1O)C3(C)O	Chlortetracycline	Drugs	478.114	-0.057
USAN00999	NS(=O)(=O)C1=C(Cl)C=CC(=C1)C1(O)NC(=O)C2=C1C=CC=C2	Chlorthalidone	Drugs	338.013	0.448
USAN01000	ClCCC1NC(=O)C2=C(O1)C=CC=C2	Chlorthenoxazine	Drugs	211.04	1.555
USAN01003	CC(C)CCCC(C)C1CCC2C3CC=C4CC(O)CCC4(C)C3CCC12C	Cholesterol	Drugs	386.355	9.52
USAN00932	CSCCC(NC(=O)C(CC1=CNC2=C1C=CC=C2)NC(=O)CNC(=O)C(NNC(CC1=CC=C(OS(O)(=O)=O)C=C1)C(=O)NC(CC(O)=O)C(=O)NC(CCC(N)=O)C(=O)N1CCCC1C=O)C(C)O)C(=O)NC(CC(O)=O)C(=O)NC(CC1=CC=CC=C1)C(N)=O	Ceruletide	Drugs	1337.47	-4.194
USAN01004	C[N+](C)(C)CCOP([O-])(=O)OCC(O)CO	Choline Alfoscerate	Drugs	257.103	-6.445
USAN01006	OC(=O)C1=CC(=O)C2=C(O1)C=CC=C2	Chromocarb	Drugs	190.027	1.3
USAN01007	CCOC(=O)COC1=CC2=C(C=C1)C(C)=C(CCN(CC)CC)C(=O)O2	Chromonar	Drugs	361.189	3.373
USAN01008	O=C(CC#N)NN=CC1=N(=O)C2=C(C=CC=C2)N(=O)=C1	Ciadox	Drugs	271.071	-1.62102
USAN01009	COC1=C(CN2CC2C#N)C=CC(C)=N1	Ciamexon	Drugs	203.106	1.384
USAN01010	CN1CC(CC(C#N)C(N)=O)CC2C1CC1=CNC3=C1C2=CC=C3	Cianergoline	Drugs	322.179	0.671
USAN01011	OC1CC2=C(OC1C1=CC(O)=C(O)C=C1)C=C(O)C=C2O	Cianidanol	Drugs	290.079	0.534
USAN01012	CN(C)CCCN1C2=CC(=CC=C2CCC2=C1C=CC=C2)C#N	Cianopramine	Drugs	305.189	4.866
USAN01013	CC(=O)NN1C=NC(=O)C(=C1)C#N	Ciapilome	Drugs	178.049	-1.621
USAN01014	CCC#CCC(C)C(O)C#CC1C(O)CC2CC(CC12)=CCOCC(O)=O	Cicaprost	Drugs	374.209	2.208
USAN00933	CCCCCCCCCCCCCCCCNC1=CC=C(C=C1)C(O)=O	Cetaben	Drugs	361.298	9.665
USAN01015	NC(=O)OC1CCN(CCCC(=O)C2=CC=C(F)C=C2)C2CCCCC12	Cicarperone	Drugs	362.201	3.362
USAN01016	CC(O)C(=O)OC1CC(C)CC(C)(C)C1	Ciclactate	Drugs	214.157	3.39
USAN01017	OC1=CC(=CC=C1)C1CNC2(CCCCCC2)O1	Ciclafrine	Drugs	247.157	3.202
USAN01018	OC1(C2=NCCCN2C2=C1C=CC=C2)C1=C(Cl)C=CC=C1	Ciclazindol	Drugs	298.087	3.733
USAN01019	CC1=C(O)C2=C(C=N1)C(OC2)C1=CC=C(Cl)C=C1	Cicletanine	Drugs	261.056	3.136
USAN01020	CC1=C(I)C(C)=C(C2CCCCC2)C(O)=C1	Cicliomenol	Drugs	330.048	5.713
USAN01021	CC1CC(CC(C)(C)C1)OC(=O)C1=CN=CC=C1	Ciclonicate	Drugs	247.157	4.355
USAN01024	CNC1CCN2C3=C(CCC4=CC=CC1=C24)C=CC=C3	Ciclopramine	Drugs	264.163	3.963
USAN01025	CC(C(O)=O)C1=CC=C2C(CC3=C2C=CC=C3)=C1	Cicloprofen	Drugs	238.099	3.656
USAN01026	CC(C)NCC(O)COC1=CC=C(OCCOCC2CC2)C=C1	Cicloprolol	Drugs	323.21	2.391
USAN00935	CNC(=O)COC1=CC=CC=C1OCC(O)CNC(C)(C)C	Cetamolol	Drugs	310.189	0.479
USAN01027	O=C([N-]C1=C[N+](=NO1)N1CCOCC1)C1CCCCC1	Ciclosidomine	Drugs	280.154	3.542
USAN01028	ClC1=CC=CC=C1C1=NCC2=NN=C(C3CCCCC3)N2C2=C1C=C(Br)S2	Ciclotizolam	Drugs	460.012	4.829
USAN01030	OC(=O)C1CCCCC1(O)C1=CC=CC=C1	Cicloxilic Acid	Drugs	220.11	2.235
USAN01031	CC1(C)C(CCC2(C)C1CCC1(C)C2C(=O)C=C2C3CC(C)(CCC3(C)CCC12C)C(O)=O)OC(=O)C1CCCCC1C(O)=O	Cicloxolone	Drugs	624.403	8.593
USAN01032	CC(=O)OCC(=O)C12OC(C)(C)OC1CC1C3CC(C#N)=C4C=C(CCC4(C)C3(F)C(O)CC21C)OCCCl	Cicortonide	Drugs	565.224	3.559
USAN01033	CC(=CC(O)=O)C1CCCCC1	Cicrotoic Acid	Drugs	168.115	3.4
USAN01034	CN(C)CCC=C1C2=CC=CC=C2OCC2=C1C=CC=C2	Cidoxepin	Drugs	279.162	4.092
USAN01035	C1C(C2=NCCN2)C1(C1=CC=CC=C1)C1=CC=CC=C1	Cifenline	Drugs	262.147	4.134
USAN01036	NC1=NC(=O)N(C=C1)C1OC(CO)C2OP(O)(=O)OC12	Cifostodine	Drugs	305.041	-3.403
USAN01037	CC1(COC2=CC=C(CC3SC(=O)NC3=O)C=C2)CCCCC1	Ciglitazone	Drugs	333.14	5.074
USAN00937	O=C(OCCN1CCCCCC1)C(C1CCCCC1)C1=CSC=C1	Cetiedil	Drugs	349.208	5.965
USAN01038	CN(C)CC1COC2(O1)C1=CC=CC=C1CCC1=C2C=CC=C1	Ciheptolane	Drugs	309.173	3.734
USAN01039	COC1=C(OC)C=C(C=C1)C(O)CN1CCN(CC1)C1=CC=CC=CC1=O	Ciladopa	Drugs	370.189	1.596
USAN01041	CCOC(=O)C(CCC1=CC=CC=C1)NC1CCCN2CCCC(N2C1=O)C(O)=O	Cilazapril	Drugs	417.226	1.473
USAN01042	OC(=O)C(CCC1=CC=CC=C1)NC1CCCN2CCCC(N2C1=O)C(O)=O	Cilazaprilat	Drugs	389.195	1.497
USAN01043	CC(C)NC1C2CCC(CC2)C1(O)C1=CC=C(Cl)C(Cl)=C1	Cilobamine	Drugs	327.116	4.649
USAN01044	CCCCCCCCOC1=CC=C(C=C1)C(=O)NC1CC(O)C(O)NC(=O)C2C(O)C(C)CN2C(=O)C(NC(=O)C(NC(=O)C2CC(O)CN2C(=O)C(NC1=O)C(C)O)C(O)C(O)C1=CC=C(O)C=C1)C(C)O	Cilofungin	Drugs	1029.49	0.289
USAN01045	CN(C1CCCCC1)C(=O)CCCOC1=CC2=C(NC(=O)C=C2)C=C1	Cilostamide	Drugs	342.194	2.832
USAN01047	COC1=CC=C(Cl)C=C1C(=O)NC(=O)NCCCN1CCN(CC1)C1=CC=CC(C)=C1	Ciltoprazine	Drugs	444.193	5.285
USAN01048	CC(C)NCC(O)C1=CC=C(N)C(=C1)C#N	Cimaterol	Drugs	219.137	0.273
USAN01049	NNCC1CCCCC1	Cimemoxin	Drugs	128.131	1.586
USAN01051	CNC(NCCSCC1=C(C)NC=N1)=NC#N	Cimetidine	Drugs	252.116	0.38
USAN01061	CCOC(=O)CN1CCN(CC1)C(=O)C=CC1=CC(OC)=C(OC)C(OC)=C1	Cinepazet	Drugs	392.195	2.281
USAN01162	ClC1=CC=C(C=C1)C1=C(CCN2CCN(CC2)C2=CC=CC=C2)OC(=O)O1	Clodoxopone	Drugs	384.124	3.793
USAN01062	COC1=CC(C=CC(=O)N2CCN(CC(O)=O)CC2)=CC(OC)=C1OC	Cinepazic Acid	Drugs	364.163	-0.511
USAN01063	COC1=CC(C=CC(=O)N2CCN(CC(=O)N3CCCC3)CC2)=CC(OC)=C1OC	Cinepazide	Drugs	417.226	1.616
USAN01064	CN(CCOC(C1=CC=CC=C1)C1=CC=CC=C1)CC=CC1=CC=CC=C1	Cinfenine	Drugs	357.209	5.824
USAN01065	OC(=O)COC1=CC=C(C=C1)C(=O)C=CC1=CC=C(C=C1)C(O)=O	Cinfenoac	Drugs	326.079	2.876
USAN01066	FC1=CC(C=CC(=O)NC2CC2)=CC=C1	Cinflumide	Drugs	205.09	2.532
USAN01067	CC12CCC3C(CC=C4CCCCC34)C1CCC2(O)C#C	Cingestol	Drugs	284.214	5.119
USAN01068	CCOC1=CC(=CC(=C1N)N(=O)=O)C(=O)NC1CCN(CC2CCC=CC2)CC1	Cinitapride	Drugs	402.227	2.76494
USAN01069	COC1=CC2=C(C=C1)N(C(=O)C=CC1=CC=CC=C1)C(C)=C2CC(O)=O	Cinmetacin	Drugs	349.131	3.951
USAN01070	CCN(CC)CCOC(=O)C(=CC1=CC=CC=C1)C1=CC=CC=C1	Cinnamaverine	Drugs	323.189	5.061
USAN01053	COCC1CN(C(=O)O1)C1=CC=C(OCC2=CC=CC(=C2)C#N)C=C1	Cimoxatone	Drugs	338.127	2.344
USAN01071	CC(C(O)C1=CC=CC=C1)N(C)CC=CC1=CC=CC=C1	Cinnamedrine	Drugs	281.178	3.854
USAN01072	C(C=CC1=CC=CC=C1)N1CCN(CC1)C(C1=CC=CC=C1)C1=CC=CC=C1	Cinnarizine	Drugs	368.225	6.051
USAN01073	O=C1C(CC2CCCO2)C(=O)N2N1C1=C(C=CC=C1)C1=C2C=CC=C1	Cinnofuradione	Drugs	334.132	1.366
USAN01074	COC1=CC(C=CC(=O)N2CCCCCCC2)=CC(OC)=C1OC	Cinoctramide	Drugs	333.194	3.312
USAN01075	CC1OC(OC2=CC=C(C=CC(=O)NCCCNCCCCN)C=C2)C(NC(N)=N)C(O)C1NC(=O)NC1OCC(OC2OCC(O)C3NC(=O)N(C23)C(N)=O)C(O)C1NC(N)=O	Cinodine-A	Drugs	893.436	-3.658
USAN01076	CC1OC(OC2=CC=C(C=CC(=O)NCCCNCCCCN)C=C2)C(NC(N)=N)C(O)C1NC(=O)NC1OCC(OC2OCC3OC(=O)NC3C2NC(N)=O)C(O)C1NC(N)=O	Cinodine-B	Drugs	893.436	-4.301
USAN01078	CC1=N(=O)C2=C(C=CC=C2)N(=O)=C1C(=O)NCCC#N	Cinoquidox	Drugs	272.091	-1.11169
USAN01079	CCN1N=C(C(O)=O)C(=O)C2=C1C=C1OCOC1=C2	Cinoxacin	Drugs	262.059	1.735
USAN01080	CCOCCOC(=O)C=CC1=CC=C(OC)C=C1	Cinoxate	Drugs	250.121	2.754
USAN01081	CC(=O)OC1CCC2(C)C(CCC3(C)C2C(=O)C=C2C4CC(C)(CCC4(C)CCC32C)C(=O)OCC=CC2=CC=CC=C2)C1(C)C	Cinoxolone	Drugs	628.413	10.172
USAN01054	COC1=CC(C=CC(O)=O)=CC=C1OCCO	Cinametic Acid	Drugs	238.084	1.024
USAN01082	O=C(CN1CCN(CC1)C(=O)C=CC1=CC=C2OCOC2=C1)N1CCCC1	Cinoxopazide	Drugs	371.185	2.345
USAN01083	O=C1CCC(C2CCN(CC=CC3=CC=CC=C3)CC2)(C(=O)N1)C1=CC=CC=C1	Cinperene	Drugs	388.215	3.724
USAN01084	O=C(CCN1C(CN2CCN(CC=CC3=CC=CC=C3)CC2)=NC2=C1C=CC=C2)C1=CC=CC=C1	Cinprazole	Drugs	464.258	5.53
USAN01085	COC1=CC(C=CC(=O)N2CCN(CC(=O)NC(C)C)CC2)=CC(OC)=C1OC	Cinpropazide	Drugs	405.226	1.669
USAN01086	CCNC(=O)C=CC1=CC=CC(Br)=C1	Cinromide	Drugs	253.01	3.197
USAN01087	CCCCCC1C(=O)N2C=C(C3=CC=CC=C3)C3=C(C=CC=C3)N2C1=O	Cintazone	Drugs	346.168	3.874
USAN01088	COC1=CC(C=CC(N)=O)=CC(OC)=C1OC	Cintriamide	Drugs	237.1	0.879
USAN01089	FC1=CC=C(C=C1)C(=O)CCCN1CCN(CC1)C1=CC2=C(C=CC=C2)C=N1	Cinuperone	Drugs	377.19	4.513
USAN01090	O=C(CN1CCCC1)NC1C(C1C1=CC=CC=C1)C1=CC=CC=C1	Ciprafamide	Drugs	320.189	3.642
USAN01091	CN(C(=O)CNC1CC1)C1=C(C=C(Cl)C=C1)C(=O)C1=CC=CC=C1Cl	Ciprazafone	Drugs	376.075	3.686
USAN01055	COC(=O)C=CC1=C(OCC(O)CNC(C)C)C=CC=C1	Cinamolol	Drugs	293.163	1.902
USAN01092	OC1=CC(=CC=C1)C12CCCCC1CN(CC1CC1)CC2	Ciprefadol	Drugs	285.209	4.357
USAN01093	CC1(C)OC2CC3C4CC(F)C5=CC(=O)C=CC5(C)C4(F)C(O)CC3(C)C2(O1)C(=O)COC(=O)C1CC1	Ciprocinonide	Drugs	520.227	3.373
USAN01094	CC(C)(OC1=CC=C(C=C1)C1CC1(Cl)Cl)C(O)=O	Ciprofibrate	Drugs	288.032	3.177
USAN01095	OC(=O)C1=CN(C2CC2)C2=C(C=C(F)C(=C2)N2CCNCC2)C1=O	Ciprofloxacin	Drugs	331.133	-0.725
USAN01096	COC1=C(C=C(C=C1)S(N)(=O)=O)C(=O)NCC1CCCN1CC1CC1	Cipropride	Drugs	367.157	1.424
USAN01097	COC1=CC2=C(C=C1)N(CC1CC1)C(=O)N=C2C1=CC=CC=C1	Ciproquazone	Drugs	306.137	3.719
USAN01098	CCCCCC(O)C=CC1C(O)CC2(C)CC(CC12)=CCCCC(O)=O	Ciprostene Acid	Drugs	364.261	4.036
USAN01099	CN(C)C(C1CCCCC1O)C1=CC(O)=CC=C1	Ciramadol	Drugs	249.173	2.376
USAN01100	C(OC1=CC=CC=C1C1CC1)C1=NCCN1	Cirazoline	Drugs	216.126	2.542
USAN01101	COC1CN(CCCOC2=CC=C(F)C=C2)CCC1NC(=O)C1=C(OC)C=C(N)C(Cl)=C1	Cisapride	Drugs	465.183	3.811
USAN01056	CN(C)CCCSC1=CC=CC=C1NC(=O)C=CC1=CC=CC=C1	Cinanserin	Drugs	340.161	4.344
USAN01102	FC1=CC2=C(SC(CN3C=CN=C3)C2OCC2=C(F)C=CC=C2F)C=C1	Cisconazole	Drugs	376.086	3.811
USAN01103	CC(=O)C1(O)CCC2C3CC(Cl)C4=CC(=O)C=CC4(C)C3CCC12C	Cismadinone	Drugs	362.165	3.499
USAN01105	CN(CC1=CC(Br)=CC(Br)=C1NC(=O)C(CSSCC(NC(=O)OCC1=CC=CC=C1)C(=O)NC1=C(CN(C)C2CCCCC2)C=C(Br)C=C1Br)NC(=O)OCC1=CC=CC=C1)C1CCCCC1	Cistinexine	Drugs	1220.07	10.612
USAN01107	CN1CCC2=C(CC1)C1=C(SC3=CC=C(C=C23)C#N)C=CC=C1	Citatepine	Drugs	318.119	4.481
USAN01108	NC(=O)C1C2=CC=CC=C2C=CC2=C1C=CC=C2	Citenamide	Drugs	235.1	2.742
USAN01109	NS#CNN=CC1=CC=C(S1)C#N	Citenazone	Drugs	210.003	0.733
USAN01110	C[N+](C)(C)CCOP([O-])(=O)OP(O)(=O)OCC1OC(C(O)C1O)N1C=CC(N)=NC1=O	Citicoline	Drugs	488.107	-1.589
USAN01111	CC(=O)NC1CCSC1=O	Citiolone	Drugs	159.035	-0.491
USAN01112	OC(=O)COC1=CC=CC=C1NC(=O)C1=CC(Cl)=C(Cl)C=C1	Clamidoxic	Drugs	339.007	2.865
USAN01113	CCN(CC)CCCNCC1=C(O)C2=C(C=CC=N2)C(Cl)=C1	Clamoxyquin	Drugs	321.161	3.954
USAN01057	COC1=CC2=C(C=C1)C=C(C=C2)C(C)C(=O)SCC(NC(C)=O)C(O)=O	Cinaproxen	Drugs	375.114	2.828
USAN01114	CN(C)C1=CC=CC(F)=C1C(=O)NC(=O)NC1=CC=C(Cl)C=C1	Clanfenur	Drugs	335.084	4.587
USAN01115	COC1=CC=C(C=C1)N(CCCC(O)=O)C(=O)C1=CC=C(Cl)C=C1	Clanobutin	Drugs	347.092	3.357
USAN01116	OC(=O)C1=CSC=C1NC1=C(Cl)C=CC=C1Cl	Clantifen	Drugs	286.957	5.647
USAN01119	CN1C2=CC=C(Cl)C=C2C2N(CCC3=C2C=CC=C3)CC1=O	Clazolam	Drugs	312.103	3.83
USAN01120	CN1C(=O)CN(C1=N)C1=CC=C(Cl)C=C1	Clazolimine	Drugs	223.051	1.553
USAN01121	ClC1=CC=C(C=C1)C(C#N)C1=C(Cl)C=C(C=C1)N1N=CC(=O)NC1=O	Clazuril	Drugs	372.018	4.268
USAN01122	COC1=CC(N)=C(Cl)C=C1C(=O)NC1CCN(CC2=CC=CC=C2)CC1	Clebopride	Drugs	373.156	2.607
USAN01123	OCCN(CC1=CC=C(OC2=CC=C(C=C2)N(=O)=O)C=C1)C(=O)C(Cl)Cl	Clefamide	Drugs	398.044	3.22548
USAN01125	CN(C)CC(O)C(C1=CC=CC=C1)C1=CC(Cl)=CC=C1	Clemeprol	Drugs	289.123	3.631
USAN01126	ClC1=CC=C(CN2C(CN3CCCC3)=NC3=C2C=CC=C3)C=C1	Clemizole	Drugs	325.135	4.28
USAN01058	OC(=O)C1=CC(=NC2=C1C=CC=C2)C1=CC=CC=C1	Cinchophen	Drugs	249.079	4.281
USAN01127	CC(C)(C)NCC(O)C1=CC(Cl)=C(N)C(Cl)=C1	Clenbuterol	Drugs	276.08	2.393
USAN01128	CCCCN1CCCC1=NC1=CC=C(Cl)C(Cl)=C1	Clenpirin	Drugs	284.085	5.248
USAN01129	CC(CCCNCCO)NC1=CC=NC2=C1C=CC(Cl)=C2	Cletoquine	Drugs	307.145	2.994
USAN01130	CC(CC(=O)NC1=CC=C(Cl)C=C1Cl)N1CCCCC1	Clibucaine	Drugs	314.095	3.934
USAN01131	ClC1=CC=CC(Cl)=C1N=C1NCCO1	Clidafidine	Drugs	230.001	3.582
USAN01132	OC(=O)C1CCC2=C1C=C(Cl)C(=C2)C1CCCCC1	Clidanac	Drugs	278.107	5.161
USAN01134	CC1=NC=C2CN=C(C3=CC=CC=C3Cl)C3=C(C=CC(Cl)=C3)N12	Climazolam	Drugs	341.049	3.692
USAN01135	CC(C)(C)C(=O)C(OC1=CC=C(Cl)C=C1)N1C=CN=C1	Climbazole	Drugs	292.098	3.426
USAN01136	ClC1=C(C2=CC=CC=C2)C2=C(C=CC=C2)C(=N1)N1C=CN=C1	Climiqualine	Drugs	305.072	4.243
USAN01138	CCC(C)(OC1=CC=C(C=C1)C1(CCCCC1)C1=CC=C(OC(C)(CC)C(O)=O)C=C1)C(O)=O	Clnofibrate	Drugs	468.251	7.029
USAN01059	COC1=CC(C=CC(=O)OC(CN2CCOCC2)CC2=C(C)C3=C(OC2=O)C=C(NC(=O)N2CCOCC2)C=C3)=CC(OC)=C1OC	Cinecromen	Drugs	651.279	3.121
USAN01139	CCCCCC=CCC=CCCCCCCCC(=O)NC1CCCCC1	Clinolamide	Drugs	361.334	8.449
USAN01141	CC(=O)OC1=C(C=C(I)C=C1I)C(=O)NC1=CC=C(Cl)C=C1	Clioxanide	Drugs	540.844	5.146
USAN01142	CC(C(O)=O)C1=CC=C(C(=O)C2=CC=CS2)C(Cl)=C1	Cliprofen	Drugs	294.012	3.031
USAN01143	CC(NCCCC1=CC=CC=C1)C(O)C1=CC=C(C)C(O)=C1	Cliropamine	Drugs	299.189	3.146
USAN01145	CCCOC1C(O)C(OCC)OC1C(COCC1=CC=C(Cl)C=C1)OCC1=CC=C(Cl)C=C1	Clobenoside	Drugs	498.158	5.367
USAN01146	CN(C)CCN1C2=C(NC3=C(C=CC=C3)C1=O)C=C(Cl)C=C2	Clobenzepam	Drugs	315.114	3.791
USAN01147	CC(CC1=CC=CC=C1)NCC1=CC=CC=C1Cl	Clobenzorex	Drugs	259.113	4.629
USAN01148	CN1C2CCC1CC(C2)OC(C1=CC=CC=C1)C1=CC=C(Cl)C=C1	Clobenztropine	Drugs	341.155	4.233
USAN01150	CCCC(=O)OC1(C(C)CC2C3CCC4=CC(=O)C=CC4(C)C3(F)C(=O)CC12C)C(=O)CCl	Clobetasone Butyrate	Drugs	478.192	4.207
USAN01151	CC(CN(C)C)C(C)(O)CC1=CC=C(Cl)C=C1	Clobutinol	Drugs	255.139	3.279
USAN01060	COC1=CC(C=CC(=O)N2CCN(CC(O)COC3=C4OCCOC4=C(C=C3)C(C)=O)CC2)=CC(OC)=C1OC	Cinepaxadil	Drugs	556.242	2.341
USAN01152	CC(C)(OCC1=CC=C(C=C1)C1=CC=C(Cl)C=C1)C(O)=O	Clobuzarit	Drugs	304.087	4.639
USAN01153	CC12CCC(CC1CN(CCO)C(=O)C1=CC=C(Cl)C=C1)C2	Clocanfamide	Drugs	321.15	4.541
USAN01154	NC(=O)C1(CCN(CCCN2C3=C(CCC4=C2C=C(Cl)C=C4)C=CC=C3)CC1)N1CCCCC1	Clocapramine	Drugs	480.266	5.848
USAN01155	CC1(C)N=C(N)N=C(N)N1COC1=CC=C(Cl)C(Cl)=C1	Clociguanil	Drugs	315.065	2.116
USAN01156	ClC1=CC=C(C=C1)C(N1CCN(CC=CC2=CC=CC=C2)CC1)C1=CC=CC=C1	Clocinizine	Drugs	402.186	6.764
USAN01157	CC1CC2C3CC(F)C4=CC(=O)C=CC4(C)C3(Cl)C(O)CC2(C)C1C(=O)COC(C)=O	Clocortolone Acetate	Drugs	452.177	3.331
USAN01158	CCCC(C1=CC=C(CCCl)C=C1)C1=C(O)C2=C(OC1=O)C=CC=C2	Clocoumarol	Drugs	356.118	5.981
USAN01159	CCN(CC)CCN(CC)CC(=O)NC1=C(Cl)C=CC=C1	Clodacaine	Drugs	311.176	3.462
USAN01160	ClC1=CC=C(C=C1Cl)C1=CC=C(O1)C=NN1CC(=O)NC1=O	Clodanolene	Drugs	337.002	3.194
USAN01161	CN(C)CCCN1C(=O)N(C2=C1C=CC(Cl)=C2)C1=CC=CC=C1	Clodazon	Drugs	329.129	4.926
USAN01164	CC(C)N=C1C=C2N(C3=CC=C(Cl)C=C3)C3=C(C=CC=C3)N=C2C=C1NC1=CC=C(Cl)C=C1	Clofazimine	Drugs	472.122	7.699
USAN01175	CN(C)C(=O)CCCOC(=O)C(C)(C)OC1=CC=C(Cl)C=C1	Clofibride	Drugs	327.124	3.111
USAN01274	CC1CC2C3C=C(C)C4=CC5=C(CC4(C)C3C(O)CC2(C)C1(O)C(=O)COC(C)=O)C=NN5C1=CC=CC=C1	Cortivazol	Drugs	530.278	5.321
USAN01177	FC(F)(F)C1=CC(NC(=O)NC2=CC=C(Cl)C=C2)=CC=C1Cl	Cloflucarban	Drugs	348.004	5.791
USAN01178	CC(C)(C)CC(C)(C)C1=CC=C(O)C(CC2=C(Cl)C=C(Cl)C=C2)=C1	Clofoctol	Drugs	364.136	8.55
USAN01179	CCOC(=O)NC(C)(C)CC1=CC=C(Cl)C=C1	Cloforex	Drugs	255.103	3.889
USAN01180	ClC1=CC2=C(OC(=O)C2)C=C1C1CCCCC1	Clofurac	Drugs	250.076	4.82
USAN01181	CC(=O)OC1(CCC2C3C=C(Cl)C4=CC(CCC4(C)C3CCC12C)=[O]C(C)=O)C(C)=O	Clogestone Acetate	Drugs	448.202	NaN
USAN01182	NC(=N)NC(=O)NC1=CC=C(C#N)C(Cl)=C1	Cloguanamil	Drugs	237.042	1.489
USAN01183	CN(C)CCCC1C2=CC(Cl)=CC=C2NC2=C1C=CC=C2	Clomacran	Drugs	300.139	5.172
USAN01184	CC1CC2C3C=C(Cl)C4=CC(=O)CCC4(C)C3CCC2(C)C1(OC(C)=O)C(C)=O	Clomegestone Acetate	Drugs	418.191	4.495
USAN01185	COC1=CC2=C(C=C1)C(C(=O)C1=CC=C(Cl)C=C1)=C(C)N2CC(O)=O	Clometacin	Drugs	357.077	4.468
USAN01165	OC(=O)C1=CC=CC=C1NC1=CC=C(Cl)C(Cl)=C1	Clofenamic Acid	Drugs	281.001	5.787
USAN01186	CC1CC2C3CC(Cl)C4=CC(=O)CCC4(C)C3CCC2(C)C1C(C)=O	Clometherone	Drugs	362.201	4.467
USAN01187	CC1=C(CCCl)SC=N1	Clomethiazole	Drugs	161.007	1.676
USAN01188	COC(C(=O)NC1C2SC(C)(C)C(N2C1=O)C(O)=O)C1=CC=C(Cl)C(Cl)=C1	Clometocillin	Drugs	432.031	3.234
USAN01189	CCN(=O)(CC)CCOC1=CC=C(C=C1)C(=C(Cl)C1=CC=CC=C1)C1=CC=CC=C1	Clomifenoxide	Drugs	421.181	5.0963
USAN01190	NC1=NCC(O1)C1=CC=C(Cl)C=C1	Clominorex	Drugs	196.04	1.629
USAN01191	CCN(CC)CCOC1=CC=C(C=C1)C(=C(Cl)C1=CC=CC=C1)C1=CC=CC=C1	Clomiphene	Drugs	405.186	7.151
USAN01192	CN(C)CCCN1C2=CC(Cl)=CC=C2CCC2=C1C=CC=C2	Clomipramine	Drugs	314.155	5.921
USAN01193	CN(C)C1C2CC3C(=C(O)C2(O)C(=O)C(C(=O)NCO)=C1O)C(=O)C1=C(C(Cl)=CC=C1O)C3(C)O	Clomocycline	Drugs	508.125	-0.051
USAN01194	OC(=O)C1(CCCCCC2=CC=C(Cl)C=C2)CO1	Clomoxir	Drugs	268.087	4.669
USAN01195	ClC1=CC=CC=C1C1=NCC(=O)NC2=C1C=C(C=C2)N(=O)=O	Clonazepam	Drugs	315.041	3.12511
USAN01166	NS(=O)(=O)C1=CC(=C(Cl)C=C1)S(N)(=O)=O	Clofenamide	Drugs	269.954	-0.391
USAN01196	ClC1=CC=C(CC2=NCCN2)C2=C1C=CC=C2	Clonazoline	Drugs	244.077	4.539
USAN01197	ClC1=CC=CC(Cl)=C1N=C1NCCN1	Clonidine	Drugs	229.017	1.428
USAN01198	CCN(CC)CCN1C(CC2=CC=C(Cl)C=C2)=NC2=C1C=CC(=C2)N(=O)=O	Clonitazene	Drugs	386.151	4.69074
USAN01199	ClCC(CON(=O)=O)ON(=O)=O	Calonitrate	Drugs	199.984	1.37309
USAN01200	CC1=C(NC2=C(C=CC=N2)C(=O)OCC(O)CO)C=CC=C1Cl	Clonixeril	Drugs	336.088	3.341
USAN01201	CC1=C(NC2=C(C=CC=N2)C(O)=O)C=CC=C1Cl	Clonixin	Drugs	262.051	5.182
USAN01202	CC1CCCC(C)N1NC(=O)C1=CC=C(Cl)C(=C1)S(N)(=O)=O	Clopamide	Drugs	345.091	2.365
USAN01204	ClC1=CC=C(C=C1)C(OCCN1CCCCC1)C1=CC=CC=C1	Cloperastine	Drugs	329.155	5.376
USAN01205	ClC1=CC(=CC=C1)N1CCN(CCCN2C(=O)NC3=C(C=CC=C3)C2=O)CC1	Cloperidone	Drugs	398.151	4.56
USAN01206	COC(=O)C(N1CCC2=C(C1)C=CS2)C1=C(Cl)C=CC=C1	Clopidogrel	Drugs	321.059	4.208
USAN01167	CCN(CC)CCOC1(CCCCC1)C1=CC=C(Cl)C=C1	Clofenciclan	Drugs	309.186	5.896
USAN01207	CC1=NC(C)=C(Cl)C(O)=C1Cl	Clopidol	Drugs	190.99	2.87
USAN01208	FC1=CC=C(C=C1)C(CCCN1CCC(CC1)N1C(=O)NC2=C1C=CC(Cl)=C2)C1=CC=C(F)C=C1	Clopimozide	Drugs	495.189	7.324
USAN01209	CN1CCC(CC1)=C1C2=CC=CC=C2OC2=C1C=C(Cl)C=C2	Clopipazan	Drugs	311.108	5.391
USAN01210	CC1=CC(CC(O)=O)=C(C)N1C1=CC=C(Cl)C=C1	Clopirac	Drugs	263.071	4.283
USAN01211	ClCC(NC(=O)C(Cl)Cl)C(=O)C1=CC=C(Cl)C=C1	Cloponone	Drugs	326.939	2.983
USAN01212	CC12CC(O)C3C(C=C(Cl)C4=CC(=O)C=CC34C)C1CCC2(O)C(=O)CO	Cloprednol	Drugs	392.139	1.522
USAN01213	OC(COC1=CC(Cl)=CC=C1)C=CC1C(O)CC(O)C1CC=CCCCC(O)=O	Cloprostenol	Drugs	424.165	2.431
USAN01214	CC1=C(CCCCl)SC=N1	Cloprothiazole	Drugs	175.022	2.205
USAN01216	ClC1=CC=C(CC2CCC3CCCCN3C2)C=C1	Cloquinozine	Drugs	263.144	4.774
USAN01217	CC(=O)NC1=CC=C(OC(O)C(Cl)(Cl)Cl)C=C1	Cloracetadol	Drugs	296.973	2.282
USAN01168	CCN(CC)CCOC(C)(C1=CC=CC=C1)C1=CC=C(Cl)C=C1	Clofenetamine	Drugs	331.17	5.622
USAN01218	CC(C)(C)NCC(O)COC1=CC(Cl)=CC=C1Cl	Cloranolol	Drugs	291.079	3.363
USAN01219	OC(=O)C1N=C(C2=CC=CC=C2)C2=C(NC1=O)C=CC(Cl)=C2	Clorazepate	Drugs	314.046	2.51
USAN01220	ClC(Cl)(Cl)COC(=O)OCC(Cl)(Cl)Cl	Clorethate	Drugs	321.829	4.718
USAN01221	NS(=O)(=O)C1=CC2=C(CN(C3CCCCC3)C2=O)C=C1Cl	Clorexolone	Drugs	328.065	2.077
USAN01222	CN(CCCOC1=C(Cl)C=C(Cl)C=C1)CC#C	Clorgiline	Drugs	271.053	4.495
USAN01223	CCOC(=O)COC1=C(Cl)C2=C(C=C1)C(C)=C(CCN(CC)CC)C(=O)O2	Cloricromen	Drugs	395.15	3.873
USAN01224	ClC1=CC=C(OCC2=CC3=C(O2)C=CC=C3)C=C1	Cloridarol	Drugs	258.045	5.242
USAN01225	OC(=O)C1=C(O)C2=C(CCC2)C(Cl)=C1	Clorindanic Acid	Drugs	212.024	4.046
USAN01226	ClC1=CC=C(C=C1)C1C(=O)C2=C(C=CC=C2)C1=O	Clorindione	Drugs	256.029	3.523
USAN01227	CN(C)CCOC(=O)C1=CC(N)=C(Cl)C=C1	Clormecaine	Drugs	242.082	2.291
USAN01169	ClCC(=O)C1=CC=C(OC2=CC=C(C=C2)C(=O)CCl)C=C1	Clofenoxyde	Drugs	322.016	3.344
USAN01228	FC1=CC=C(C=C1)C(=O)CCCN1CCC(CC1)C(=O)C1=CC=C(Cl)C=C1	Cloroperone	Drugs	387.14	4.556
USAN01229	OC1=CC=C(Cl)C=C1CC1=CC=CC=C1	Clorophene	Drugs	218.05	4.502
USAN01230	CCC1=NC2=C(C=CC=C2)C(=O)N1C1=C(Cl)C=CC=C1Cl	Cloroqualone	Drugs	318.033	5.113
USAN01231	CN1CCN(CC1)C1CC2=C(SC3=C1C=C(Cl)C=C3)C=CC=C2	Clorotepine	Drugs	344.111	5.592
USAN01232	CC(C)NCC(O)C1=C(Cl)C=CC=C1	Clorprenaline	Drugs	213.092	2.13
USAN01233	NC1=CC(C(Cl)=C(Cl)Cl)=C(C=C1S(N)(=O)=O)S(N)(=O)=O	Clorsulon	Drugs	378.902	0.571
USAN01235	CC1=C(NC(=O)C2=CC(I)=CC(I)=C2O)C=C(Cl)C(=C1)C(C#N)C1=CC=C(Cl)C=C1	Closantel	Drugs	661.852	7.64
USAN01236	CN(C)CCC1C2=C(CCC3=CC=CN=C13)C=C(Cl)C=C2	Closiramine	Drugs	300.139	3.842
USAN01238	CN1CCN(CC1)C1=NC2=C(SC3=C1C=C(Cl)C=C3)C=CC=C2	Clothiapine	Drugs	343.091	4.277
USAN01239	CNC(=O)CCN1CCN(CCC=C2C3=CC(Cl)=CC=C3SC3=C2C=CC=C3)CC1	Clothixamide	Drugs	441.164	4.059
USAN01170	CCOP(=O)(OCC)OC(=CCl)C1=CC=C(Cl)C=C1Cl	Clofenvinfos	Drugs	357.97	3.898
USAN01241	CCC(=O)OC1(C(C)CC2C3CC(F)C4=CC(=O)C=CC4(C)C3(F)C(O)CC12C)C(=O)SCCl	Cloticasone Propionate	Drugs	516.155	4.24
USAN01242	ClC(Cl)(Cl)SN1N=C(OC1=O)C1=CC=CC=C1	Clotioxone	Drugs	309.914	4.455
USAN01243	ClC1=C(C=CC=C1)C(N1C=CN=C1)(C1=CC=CC=C1)C1=CC=CC=C1	Clotrimazole	Drugs	344.108	5.004
USAN01244	COCCCCC(=NOCCN)C1=CC=C(Cl)C=C1	Clovoxamine	Drugs	284.129	3.046
USAN01245	CCN(CC)CCNC(=O)C1=CC(Cl)=C(NC(=O)COC2=CC=C(Cl)C=C2)C=C1OC	Cloxacepride	Drugs	467.138	3.96
USAN01246	CC1=C(C(=O)NC2C3SC(C)(C)C(N3C2=O)C(O)=O)C(=NO1)C1=C(Cl)C=CC=C1	Cloxacillin	Drugs	435.066	2.516
USAN01247	ClC1=CC2=C(NC(=O)CN3CCOC23C2=C(Cl)C=CC=C2)C=C1	Cloxazolam	Drugs	348.043	4.298
USAN01248	CC12CCC3C(CCC4=CC(O)=CC=C34)C1CCC2OC(O)C(Cl)(Cl)Cl	Cloxestradiol	Drugs	418.087	5.914
USAN01249	CN(C)CCOC(=O)CON=C(C)C1=CC=C(Cl)C=C1	Cloximate	Drugs	298.108	3.476
USAN01250	CC12CCC3C(CCC4=CC(=O)CCC34C)C1CCC2OC(O)C(Cl)(Cl)Cl	Cloxotestosterone	Drugs	434.118	5.539
USAN01171	OC1=CC2=C(C=C1O)C(COC1=CC=C(Cl)C=C1)NCC2	Clofeverine	Drugs	305.082	3.088
USAN01251	OCCN1CCN(CCCN2C3=C(SC4=CC(Cl)=CN=C24)C=CC=C3)CC1	Cloxypendyl	Drugs	404.144	2.938
USAN01252	OC1=CC=C(Cl)C2=C1N=CC=C2	Cloxyquin	Drugs	179.014	2.913
USAN01253	CN1CCN(CC1)C1=NC2=C(NC3=C1C=C(Cl)C=C3)C=CC=C2	Clozapine	Drugs	326.13	3.663
USAN01254	C(O)C1C2OP(=O)(OC(CNC(=O)CCC3(C4=C(C)C5=N6=[Co+]=78(=N9=CN(C%10=CC(=C(C)C=C9%10)C)C(C2O)O1)(=N1=C(C(CCC(=O)N)C(C)(CC(N)=O)C1=C(C)C1=N=7C(C(C3CC(N)=O)N48)(C(C1CCC(=O)N)(C)CC(N)=O)C)C=C6C(C)(C)C5CCC(=O)N)CC1OC(N2C3=C(C(N)=NC=N3)N=C2)C(O)C1O)C)C)[O-]	Cobamamide	Drugs	1578.66	0
USAN01255	COC(=O)C1C2CCC(CC1OC(=O)C1=CC=CC=C1)N2C	Cocaine	Drugs	303.147	2.573
USAN01258	COC1=C2OC3C(CCC4C5CC(C=C1)=C2C34CCN5C)=NOCC(O)=O	Codoxime	Drugs	372.169	-0.439
USAN01259	CC(CCC(=O)OC1=CC=C(C=C1)C1(C(=O)NC2=CC=CC=C12)C1=CC=C(OC(=O)CCC(C)C2CCC3C4C(CC(=O)C23C)C2(C)CCC(=O)CC2CC4=O)C=C1)C1CCC2C3C(CC(=O)C12C)C1(C)CCC(=O)CC1CC3=O	Cofisatin	Drugs	1085.57	6.823
USAN01260	CCC12CCN(CC3CCC3)C(CC3=C1C=C(O)C=C3)C2(C)C	Cogazocine	Drugs	313.241	5.545
USAN01261	COC1=CC2=C(C(OC)=C1OC)C1=CC=C(OC)C(=O)C=C1C(CC2)NC(C)=O	Colchicine	Drugs	399.168	1.195
USAN01262	CC(C)CCCC(C)C1CC(=O)C2=C3CCC4CC(O)CCC4(C)C3CCC12C	Colestolone	Drugs	400.334	7.371
USAN01172	CCN(CC)CCNC(=O)COC1=CC=C(Cl)C=C1	Clofexamide	Drugs	284.129	3.378
USAN01263	NC(=O)COC(=O)C1=CC=CC=C1NC1=CC=CC(=C1)C(F)(F)F	Colfenamate	Drugs	338.088	4.187
USAN01264	CC(=O)OC1C(O)C2C(C)(C)CCC(O)C2(C)C2(O)C(=O)CC(C)(OC12C)C=C	Colforsin	Drugs	410.23	1.312
USAN01265	CCC(C)CCCCC(=O)NC(CCNCNC(=O)C1=C(O)C(C2C(O)C3C(C(=O)C4=C(C=CC=C4O)C3(C)O)=C(O)C2(O)C1=O)N(C)C)C(=O)NC(C(C)O)C(=O)NC(CCNCNC(=O)C1=C(O)C(C2C(O)C3C(C(=O)C4=C(C=CC=C4O)C3(C)O)=C(O)C2(O)C1=O)N(C)C)C(=O)NCCC1NC(=O)C(NC(=O)C(CCNCNC(=O)C2=C(O)C(C3C(O)C4C(C(=O)C5=C(C=CC=C5O)C4(C)O)=C(O)C3(O)C2=O)N(C)C)NC(=O)C(CCN)NC(=O)C(CC(C)C)NC(=O)C(CC(C)C)NC(=O)C(CCN)NC1=O)C(C)O	Colimecycline	Drugs	2585.21	-14.5996
USAN01266	CC(C)(C)NCC(O)C1=CC=C(O)C(O)=C1	Colterol	Drugs	225.136	0.552
USAN01267	CC1C2CCC3C4CC=C5CC(CCC5(C)C4CCC23CN1C)N(C)C	Conessine	Drugs	356.319	5.07
USAN01268	CCC1CC(=O)C2OC3=C(OC)C=CC4=C3C22CCN(CC3CC3)C(C4)C12	Conorphone	Drugs	367.215	3.147
USAN01269	OCC(O)C(O)C(O)C(O)C(=O)O[Cu]OC(=O)C(O)C(O)C(O)C(O)CO	Copper Gluconate	Drugs	453.031	-5.237
USAN01270	C=CCCCCCCCCC(=O)O[Cu]OC(=O)CCCCCCCCC=C	Copper Undecylenate	Drugs	429.207	8.87
USAN01271	CC1CC2C3CC(F)(F)C4=CC(=O)C=CC4(C)C3(F)C(O)CC2(C)C1(O)C(=O)COC(C)=O	Cormethasone Acetate	Drugs	470.192	2.708
USAN01273	CC1CC2C3C=C(C)C4=CC5=C(CC4(C)C3C(O)CC2(C)C1(O)C(=O)COC(=O)C1=CC=CC(=C1)S(O)(=O)=O)C=NN5C1=CC=CC=C1	Cortisuzol	Drugs	672.251	4.179
USAN01276	CSCCC(NC(=O)C(CCC(O)=O)NNC(CC1=CNC=N1)C(=O)NC(CC1=CC=CC=C1)C(=O)NC(CCCNC(N)=N)C(=O)NC(CC1=CNC2=C1C=CC=C2)C(=O)NCC(=O)NC(CCCCN)C(=O)N1CCCC1C(=O)NC(C(C)C)C(=O)NCC(=O)NC(CCCCN)C(=O)NC(CCCCN)C(=O)NC(CCCNC(N)=N)C(=O)NC(CCCNC(N)=N)C(=O)N1CCCC1C(=O)NC(C(C)C)C(=O)NC(CCCCN)C(=O)NC(C(C)C)C(=O)NC(CC1=CC=C(O)C=C1)C(=O)N1CCCC1C=O)C(=O)NC(CO)C(=O)NC(CC1=CC=C(O)C=C1)C(=O)NC(CO)C=O	Cosyntropin (? Mol. Weight)	Drugs	2915.59	-11.8793
USAN01275	CC12CCC3C(CCC4=CC(=O)CCC34C)C1CCC2(O)C(=O)CO	Cortodoxone	Drugs	346.214	2.814
USAN01285	COC(C)(NCC1=CC2=C(C=CC3=C2C=CC=C3)C2=C1C=CC=C2)OC	Crisnatol	Drugs	345.173	4.867
USAN01286	ClC1=CC=CC(COC2=C(C=CC=C2)C(=C)N2C=CN=C2)=C1	Croconazole	Drugs	310.087	4.5
USAN01287	CC1(C)OC2=C(C=C(C=C2)C#N)C(C1O)N1CCCC1=O	Cromakalim	Drugs	286.132	1.106
USAN01288	OC(COC1=CC=C(C=C1)C#N)COC1=CC=CC2=C1C(=O)C=C(O2)C1=NN=NN1[Na]	Cromitrile Sodium	Drugs	427.089	0.945
USAN01289	OC(COC1=CC=CC2=C1C(=O)C=C(O2)C(O)=O)COC1=C2C(=O)C=C(OC2=CC=C1)C(O)=O	Cromolynic Acid	Drugs	468.069	1.481
USAN01290	CCCN(C(CC)C(=O)N(C)C)C(=O)C=CC	Cropropamide	Drugs	240.184	2.086
USAN01292	CCC(N(CC)C(=O)C=CC)C(=O)N(C)C	Crotetamide	Drugs	226.168	1.557
USAN01293	CC=CC=NNC(=O)C1=CC=NC=C1	Crotoniazide	Drugs	189.09	0.683
USAN01294	CNP(=O)(OC)OC1=C(Cl)C=C(C=C1)C(C)(C)C	Crufomate	Drugs	291.079	3.42
USAN01295	COC1=CC=CC2=N(=O)C3=C(C=CC=C3O[Cu]OC3=CC=CC4=C3N(=O)=C3C=CC=C(OC)C3=N4=O)N(=O)=C12	Cuprimyxin	Drugs	577.042	-0.4762
USAN01277	CN1C(CCC1=O)C1=CN=CC=C1	Cotinine	Drugs	176.095	-0.336
USAN01296	OS(=O)(=O)C1=CC(=C(O[Cu]OC2=C(C=C(C3=C2N=CC=C3)S(O)(=O)=O)S(O)(=O)=O)C2=C1C=CC=N2)S(O)(=O)=O	Cuproxoline	Drugs	670.847	-8.617
USAN01297	CC(CN(C)C)CN1C2=CC(=CC=C2SC2=C1C=CC=C2)C#N	Cyamemazine	Drugs	323.146	4.667
USAN01298	CC(CNC(=O)CCC1(C)C(CC(N)=O)C2N([Co+]C#N)C1=C(C)C1=NC(=CC3=NC(=C(C)C4=NC2(C)C(C)(CC(N)=O)C4CCC(N)=O)C(C)(CC(N)=O)C3CCC(N)=O)C(C)(C)C1CCC(N)=O)OP([O-])(=O)OC1C(CO)OC(C1O)N1C=NC2=CC(C)=C(C)C=C12	Cyanocobalamin	Drugs	1354.57	-7.628
USAN01300	OS(=O)(=O)NC1CCCCC1	Cyclamic Acid	Drugs	179.062	1.157
USAN01302	O=C(NC1=CC=CC=C1)OCC1(COC(=O)NC2=CC=CC=C2)CCCC1	Cyclarbamate	Drugs	368.174	5.033
USAN01303	CC1C2CC3=C(C=C(O)C=C3)C1(C)CCN2CC1CC1	Cyclazocine	Drugs	271.194	3.938
USAN01304	O=C1N=C(NC2CC2)OC1C1=CC=CC=C1	Cyclazodone	Drugs	216.09	1.513
USAN01305	O=C1CCCC1(CCN1CCOCC1)C1=CCCC1	Cyclexanone	Drugs	263.189	2.409
USAN01306	CN(C)C1CCC2=C(C1)C1=C(N2)C=CC=C1	Cyclindole	Drugs	214.147	2.549
USAN01307	CN1CCC(CC1)=C(C1=CC=C(Cl)C=C1)C1=CC=CC=N1	Cycliramine	Drugs	298.124	3.668
USAN01278	CN(C)CC(=O)C=C1C2=CC=CC=C2CCC2=C1C=CC=C2	Cotriptyline	Drugs	291.162	4.24
USAN01308	CN1CCN(CC1)C(C1=CC=CC=C1)C1=CC=CC=C1	Cyclizine	Drugs	266.178	3.798
USAN01309	CCC1(C(=O)NC(=O)NC1=O)C1=CCCCC1	Cyclobarbital	Drugs	236.116	1.873
USAN01310	COC(=O)NC1=NC2=C(N1)C=CC(=C2)C(=O)C1CC1	Cyclobendazole	Drugs	259.096	2.062
USAN01311	CN(C)CCC=C1C2=CC=CC=C2C=CC2=C1C=CC=C2	Cyclobenzaprine	Drugs	275.167	5.097
USAN01312	CC(O)(CC(O)=O)C1CCCCC1	Cyclobutoic Acid	Drugs	186.126	1.882
USAN01313	CCC(C(O)=O)C1(O)CCCCC1	Cyclobutyrol	Drugs	186.126	1.912
USAN01314	CC(=O)OC1=CC=C(C=C1)C(=C1CCCCC1)C1=CC=C(OC(C)=O)C=C1	Cyclofenil	Drugs	364.167	5.123
USAN01315	CC1(C)N=C(N)N=C(N)N1C1=CC=C(Cl)C=C1	Cycloguanil	Drugs	251.094	1.066
USAN01316	OC(=O)C1=CC2=C(C=CC=C2)C(CC2=C(O)C(=CC3=C2C=CC=C3)C(O)=O)=C1O	Pamoatic Acid	Drugs	388.095	6.547
USAN01317	CC1CC(C)C(=O)C(C1)C(O)CC1CC(=O)NC(=O)C1	Cycloheximide	Drugs	281.163	0.227
USAN01279	CCOP(=S)(OCC)OC1=CC2=C(C=C1)C(C)=C(Cl)C(=O)O2	Coumaphos	Drugs	362.014	4.334
USAN01318	CC1=CC(C)=C(C2CCCCC2)C(O)=C1	Cyclomenol	Drugs	204.151	4.843
USAN01319	CC1CCCCN1CCCOC(=O)C1=CC=C(OC2CCCCC2)C=C1	Cyclomethycaine	Drugs	359.246	6.321
USAN01320	CNC(C)CC1CCCC1	Cyclopentamine	Drugs	141.152	2.411
USAN01321	NS(=O)(=O)C1=CC2=C(NC(CC3CCCC3)NS2(=O)=O)C=C1Cl	Cyclopenthiazide	Drugs	379.043	2.245
USAN01323	FC(F)(F)C1=CC=C2SC3=C(C=CC=C3)N(CCCN3CCN(CC3)C3CC3)C2=C1	Cyclophenazine	Drugs	433.18	5.169
USAN01325	CC(=O)C1CCC2C3CC(O)C45CC4CCC5(C)C3CCC12C	yclopregnol	Drugs	316.24	4.227
USAN01326	C1CC1	Cyclopropane	Drugs	42.047	1.677
USAN01329	NS(=O)(=O)C1=CC2=C(NC(NS2(=O)=O)C2CC3CC2C=C3)C=C1Cl	Cyclothiazide	Drugs	389.027	1.976
USAN01330	COC1=CC(C=C2CCCC(=CC3=CC(OC)=C(O)C=C3)C2=O)=CC=C1O	Cyclovalone	Drugs	366.147	3.695
USAN01331	CC(N(CC1=C(N)N=C(C)N=C1)C=O)=C1CCOC(=O)S1	Cycotiamine	Drugs	308.094	0.361
USAN01280	CCC1=C(CN2CCN=C2)C2=C(O1)C=CC=C2	Coumazoline	Drugs	228.126	3.894
USAN01333	NC(=O)C1C2=CC=CC=C2CCC2=C1C=CC=C2	Cyheptamide	Drugs	237.115	2.496
USAN01334	CN1C2CCC1CC(C2)OC(=O)C1C2=CC=CC=C2CCC2=C1C=CC=C2	Cyheptropine	Drugs	361.204	4.234
USAN01335	OC1CC(CC(OC(=O)C=CC2=CC=C(O)C(O)=C2)C1O)(OC(=O)C=CC1=CC=C(O)C(O)=C1)C(O)=O	Cynarine	Drugs	516.127	-0.2
USAN01336	NC1CCCC1C1=CC=CC=C1	Cypenamine	Drugs	161.12	2.366
USAN01337	CC1(C)C(C(=O)OC(C#N)C2=CC(OC3=CC=CC=C3)=CC=C2)C11C=CC2=C1C=CC=C2	Cypothrin	Drugs	421.168	6.809
USAN01338	ClC1=CC2=C(C=C1)N=C(CN(=O)=C2C1=CC=CC=C1)NCC1CC1	Cyprazepam	Drugs	339.114	3.9831
USAN01340	CN(C)CCOC(=O)CCC1CCCCC1	Cyprodenate	Drugs	227.189	3.678
USAN01341	CN1CCC(CC1)=C1C2=CC=CC=C2C=CC2=C1C=CC=C2	Cyproheptadine	Drugs	287.167	5.302
USAN01342	OC(C1CC1C1=CC=NC=C1)(C1=CC=CC=C1)C1=CC=CC=C1	Cyprolidol	Drugs	301.147	3.206
USAN01343	CCOC(=O)C1=C(O)C2=C(C=C(OCC3CC3)C(OCC3CC3)=C2)N=C1	Cyproquinate	Drugs	357.158	5.523
USAN01281	COC1C(OC(=O)C2=CC=C(C)N2)C(O)C(OC2=CC=C3C(O)=C(NC(=O)C4=C(C)C(=CN4)C(=O)NC4=C(O)C5=CC=C(OC6OC(C)(C)C(OC)C(OC(=O)C7=CC=C(C)N7)C6O)C(C)=C5OC4=O)C(=O)OC3=C2C)OC1(C)C	Coumermycin	Drugs	1109.38	5.28
USAN01344	CC(=O)OC1(CCC2C3C=C(Cl)C4=CC(=O)C5CC5C4(C)C3CCC12C)C(C)=O	Cyproterone Acetate	Drugs	416.175	3.961
USAN01345	ClC1=CC=C(C=C1)C12CC1C(=O)NC2=O	Cyproximide	Drugs	221.024	1.084
USAN01350	CN(C)CC(=O)N1C2=CC=CC=C2SC2=C1C=CC=C2	Dacemazine	Drugs	284.098	2.43
USAN01351	CC(=O)NC(CSC(C)=O)C(O)=O	Dacisteine	Drugs	205.041	-0.29
USAN01353	CCCCCCCCCCCCC(CCCN(C)CCC1=CC(OC)=CC=C1)(C#N)C1=CC(OC)=C(OC)C(OC)=C1	Dagapamil	Drugs	580.424	9.26
USAN01354	CN1N=C(C)C(NCCNCC(O)COC2=CC=CC=C2)=C1C	Dalbraminol	Drugs	318.206	1.646
USAN01355	CNCCCC1(C)CN(C2=C1C=CC=C2)C1=CC=CC=C1	Daledalin	Drugs	280.194	4.686
USAN01356	OC(=O)CC1=CC=C(CCNS(=O)(=O)C2=CC=C(Cl)C=C2)C=C1	Daltroban	Drugs	353.049	3.305
USAN01357	CC1=NN2C(=C1)N=C(N)N=C2N	Dametralast	Drugs	164.081	-0.26
USAN01358	CN(C)CC1=CC2=CC=CC=C2SC2=C1C=CC=C2	Damotepine	Drugs	267.108	4.564
USAN01282	COCC(C1=C(O)C2=CC=CC=C2OC1=O)C1=C(O)C2=C(OC1=O)C=CC=C2	Coumetarol	Drugs	380.09	2.636
USAN01360	CN1CCC(CC1)=C1C2=CC=CC=C2C(O)C2=C1C=CC=C2	Danitracen	Drugs	291.162	3.01
USAN01361	OC1=CC=CC2=C1C(=O)C1=C(O)C=CC=C1C2=O	Danthron	Drugs	240.042	3.738
USAN01362	O=C1CN(N=CC2=CC=C(O2)C2=CC=C(C=C2)N(=O)=O)C(=O)N1	Dantrolene	Drugs	314.065	1.08647
USAN01363	CC1=C(C=CC=C1)N1CCN(CCC2=NN=C3CCCCN23)CC1	Dapiprazole	Drugs	325.227	2.026
USAN01364	NC1=CC=C(C=C1)S(=O)(=O)C1=CC=C(N)C=C1	Dapsone	Drugs	248.062	0.886
USAN01365	CCCCCCCCCC(=C)NC(CC1=CNC2=C1C=CC=C2)C(=O)C(=O)C(CC(N)=O)NC(=O)C(CC(O)=O)NC(=O)C1NNCC(=O)CC(=O)C(CC(O)=O)NC(=O)C(C)NNC(CC(O)=O)C(=O)NCC(=O)NC(CO)C(=O)CCNC(C(C)CC(O)=O)C(=O)NC(CC(=O)C2=C(N)C=CC=C2)C(=O)OC1C	Daptomycin (? Structure not right)	Drugs	1545.7	-0.019
USAN01366	CN1CCN(CC1)C(=O)C=C1C2=CC=CC=C2C(=O)NC2=C1C=CC=C2	Darenzepine	Drugs	347.163	2.489
USAN01367	CCOC(=O)C1=C(C)NC(C)=C(C1C1=CC=CC2=NON=C12)C(=O)OCC	Darodipine	Drugs	371.148	4.136
USAN01370	OC(C1=NCCN1)(C1=CC=C(Cl)C=C1)C1=CC=CC=N1	Dazadrol	Drugs	287.083	2.108
USAN01371	CN1C(CC2=C(C=CC=C2)N=C1C)C1=CC=CC=C1	Dazepinil	Drugs	250.147	4.736
USAN01283	CN(CCOP(O)(O)=O)C(N)=N	Creatinolfosfate	Drugs	197.057	-1.771
USAN01372	CN(C)CCCSC1=C2C=CC=CC2=NN1CC1=CC=CC=C1	Dazidamine	Drugs	325.161	4.567
USAN01373	CC1=C(CN2C=CN=C2)C2=C(C=CC=C2)N1CCC(O)=O	Dazmegrel	Drugs	283.132	2.019
USAN01374	CC(C)N1CCN=C1CN1CCCCSC2=C1C=C(Cl)C=C2	Dazolicine	Drugs	337.138	5.676
USAN01375	CCN1CC(CN1CC)NC(=O)C1=C(OC)C=C(N)C(Cl)=C1	Dazopride	Drugs	326.151	1.591
USAN01376	OC(=O)C1=CN2C(C=NC3=C2C=CC=C3)=N1	Dazoquinast	Drugs	213.054	2.245
USAN01377	OC(=O)C1=CC=C(OCCN2C=CN=C2)C=C1	Dazoxiben	Drugs	232.085	1.716
USAN01378	CC(=O)CCC(NC(O)=O)C(O)=O	Aceglumatic Acid	Drugs	189.064	-2.001
USAN01379	CN(C)CCO	Deanol	Drugs	89.0841	-0.397
USAN01380	COC1=CC2=C(NC(C)=C2CC(=O)NO)C=C1	Deboxamet	Drugs	234.1	0.804
USAN01381	NC(=N)N1CCC2=C(C1)C=CC=C2	Debrisoquin	Drugs	175.111	0.895
USAN01284	CC1=C(O)C(=CC=C1)C(N)=O	Cresotamide	Drugs	151.063	1.726
USAN01383	CCCCCCCCCCOC1=C(OC)C=C(C=C1OC)C(N)=O	Decimemide	Drugs	337.225	4.871
USAN01384	CN1C2CCC1CC(C2)OC1C2=CC=CC=C2C=CC2=C1C=CC=C2	Decitropine	Drugs	331.194	4.46
USAN01385	CCCCCCCCCCCCCCCCCC(O)C1=CC=C(C(O)=O)C(Cl)=C1	Declaben	Drugs	424.274	9.831
USAN01386	FC1=CC=C(C=C1)C(=O)C1CCN(CCCN2C(=O)NC3=C2C=CC=C3)CC1	Declenperone	Drugs	381.185	3.531
USAN01387	OCCOCCN1CCN(CC1)C(C1=CC=CC=C1)C1=CC=CC=C1	Decloxizine	Drugs	340.215	3.282
USAN01388	CCCCCCCCCCOCC(O)CN	Decominol	Drugs	231.22	3.263
USAN01389	CCCCCCCCCCOC1=CC2=C(C=C1OCC)N=CC(C(=O)OCC)=C2O	Decoquinate	Drugs	417.252	8.867
USAN01390	CCCCCCCCC=CCCCCCCCCN	Dectaflur	Drugs	267.293	7.845
USAN01393	CC(=O)OCC(=O)C12N=C(C)OC1CC1C3CCC4=CC(=O)C=CC4(C)C3C(O)CC21C	Deflazacort	Drugs	441.215	2.86
USAN01394	OCCCNP(=O)(OCCCl)N(CCCl)CCCl	Defosfamide	Drugs	340.028	1.439
USAN01395	CC(=O)C1C(=O)OC(C)=CC1=O	Dehydroacetic Acid (keto form)	Drugs	168.042	-0.581
USAN01404	CC1=C(CC(O)=O)C2=C(C=CC=C2)N1C(=O)C1=CC=CC=C1	Delmetacin	Drugs	293.105	3.548
USAN01517	OC1=C(CC2=C(O)C=CC(Cl)=C2)C=C(Cl)C=C1	Dichlorophen	Drugs	268.006	4.795
USAN01405	CCCC(CCC)CCCC1COCCN1CCO	Delmopinol	Drugs	271.251	4.662
USAN01407	CC1(C)C(CCC2(C)C1CCC1(C)C2=CCC2C3CC(C)(CCC3(C)CCC12C)C(O)=O)OC(=O)CCC(O)=O	Deloxolone	Drugs	556.376	9.34
USAN01408	COC(=O)C=CCC=CCC1C(O)CC(O)C1C=CC(O)COC1=CC=CC(Cl)=C1	Delprostenate	Drugs	436.165	2.893
USAN01409	OC1CCC(CC1)NCC1=CC(Br)=CC(Br)=C1O	Dembrexine	Drugs	376.963	2.584
USAN01411	CN(C)C1C2CC3C(O)C4=C(C(O)=CC=C4Cl)C(=O)C3=C(O)C2(O)C(=O)C(C(N)=O)=C1O	Demeclocycline	Drugs	464.099	-0.576
USAN01412	CNC1CCC2=C(C(OC)=C(OC)C(OC)=C2)C2=CC=C(OC)C(=O)C=C12	Demecolcine	Drugs	371.173	1.755
USAN01413	CN(C)C1C2CC3C(O)C4=C(C(O)=CC=C4)C(=O)C3=C(O)C2(O)C(=O)C(C(N)=O)=C1O	Demecycline	Drugs	430.138	-1.415
USAN01414	CC(=O)C1(C)CCC2C3CCC4=CC(=O)CCC4=C3CCC12C	Demegestone	Drugs	312.209	3.541
USAN01415	CN(CCC1=CC=CC=C1)CCC1=CC=CC=C1	Demelverine	Drugs	239.167	4.062
USAN01396	CC(=O)C1=C(O)C=C(C)OC1=O	Dehydroacetic Acid (enol form)	Drugs	168.042	1.023
USAN01416	CNCCON=C1C2=CC=CC=C2C=CC2=C1C=CC=C2	Demexiptiline	Drugs	278.142	3.049
USAN01417	ClC1=CC=C(OCCOC(=CN2C=CN=C2)C2=C(Cl)C=C(Cl)C=C2)C=C1	Democonazole	Drugs	408.02	5.752
USAN01418	ClC1=CC2=C(NC(=O)CN(=O)=C2C2=CC=CC=C2)C=C1	Demoxepam	Drugs	286.051	3.06309
USAN01419	CCC(C)C1NC(=O)C(CC2=CC=C(O)C=C2)NC(=O)CCSSCC(NC(=O)C(CC(N)=O)NC(=O)C(CCC(N)=O)NC1=O)C(=O)N1CCCC1C(=O)NC(CC(C)C)C(=O)NCC(N)=O	Demoxytocin	Drugs	991.426	0.021
USAN01421	CCC(CC)COC(C(=O)OCCN(C)C)(C1=CC=CC=C1)C1=CC=CC=C1	Denaverine	Drugs	383.246	5.661
USAN01422	CCCCN1C2=C(N(CC(C)=O)C=N2)C(=O)N(CCCC)C1=O	Denbufylline	Drugs	320.185	2.64
USAN01423	COC1=CC(N)=C(C=C1C(=O)NC1CCN(CC2CCCO2)CC1)N(=O)=O	Denipride	Drugs	378.19	1.10325
USAN01424	COC1=C(OC)C=C(CCNCC(O)C2=CC=C(O)C=C2)C=C1	Denopamine	Drugs	317.163	1.667
USAN01425	CCCCC1=C(O)C(=O)N(N(C1=O)C1=CC=CC=C1)C1=CC=CC=C1	Denpidazone	Drugs	336.147	4.722
USAN01426	OC(CN1C=CN=C1)C1=CC=C(CCC2=CC=CC=C2)C=C1	Denzimol	Drugs	292.158	3.182
USAN01397	CC(CCC(O)=O)C1CCC2C3C(CC(=O)C12C)C1(C)CCC(=O)CC1CC3=O	Dehydrocholic Acid	Drugs	402.241	2.325
USAN01427	CN(C)CCC=[N]1C2=CC=CC=C2C=CC2=C1C=CC=C2	Depramine	Drugs	277.17	NaN
USAN01428	CC(=O)C1(O)CCC2C3CCC4=CC(=O)C=CC4(C)C3C(O)CC12C	Deprodone	Drugs	344.199	1.949
USAN01429	CCCCCC(C)(O)CCC1CCC(=O)C1CCCCCCC(O)=O	Deprostil	Drugs	354.277	4.467
USAN01430	CN1C2CCC1CC(C2)OC1C2=CC=CC=C2CCC2=C1C=CC=C2	Deptropine	Drugs	333.209	4.214
USAN01432	CC(C)(COC(=O)C1=CN=CC=C1)C(OC(=O)C1=CN=CC=C1)C(=O)NCCC(=O)NCCSSCCNC(=O)CCNC(=O)C(OC(=O)C1=CC=CN=C1)C(C)(C)COC(=O)C1=CC=CN=C1	Derpanicate	Drugs	974.33	2.365
USAN01433	CCCC(=O)C1=C(O)C(CC2=C(O)C(C)(C)C(O)=C(C(=O)CCC)C2=O)=C(OC)C=C1O	Desaspidin	Drugs	446.194	4.093
USAN01434	NC1=NC2=C(C=N1)N=CN2COCCO	Desciclovir	Drugs	209.091	-1.438
USAN01435	CC(=O)C12OC(C)(C)OC1CC1C3CCC4=CC(=O)C=CC4(C)C3(F)C(O)CC21C	Descinolone Acetonide	Drugs	418.216	2.734
USAN01436	COC1C(CC2CN3CCC4=C(NC5=C4C=CC=C5)C3CC2C1C(=O)OC)OC(=O)C1=CC(OC)=C(OC)C(OC)=C1	Deserpidine	Drugs	578.263	3.838
USAN01437	CNCCCN1C2=CC=CC=C2CCC2=C1C=CC=C2	Desipramine	Drugs	266.178	4.468
USAN01398	CCC1=C(CC2NCCC3=C2C=C(OC)C(OC)=C3)CC2N(CCC3=C2C=C(OC)C(OC)=C3)C1	Dehydroemetine	Drugs	478.283	4.664
USAN01439	O=C(N1CCCC1)C(CCN1CCOCC1)(C1=CC=CC=C1)C1=CC=CC=C1	Desmethylmoramide	Drugs	378.231	3.675
USAN01440	NC(=O)CCC1NC(=O)C(CC(N)=O)NNC(CSCCSCCCC(=O)C(=O)C(CC2=CC=C(O)C=C2)NC(=O)C(CC2=CC=CC=C2)NC1=O)C(=O)N1CCCC1C(=O)NC(CCCNC(N)=N)C(=O)NCC(N)=O	Desmopressin (? weight)	Drugs	1110.47	-2.488
USAN01441	CCC(C)C1CN2CCCC2C2(O)OC(NC(=O)C3CC4C(CC5=CNC6=C5C4=CC=C6)N(C)C3)(C(C)C)C(=O)N12	Desocriptine	Drugs	563.347	5.801
USAN01446	CC(=O)OCC(=O)C1CCC2C3CCC4=CC(=O)CCC4(C)C3CCC12C	Desoxycorticosterone Acetate	Drugs	372.23	3.977
USAN01448	CCN(CC)CCOC(=O)C1=CC=CC=C1O	Detanosal	Drugs	237.136	3.478
USAN01449	CC(C)NCC(O)C1=CC=C(O)C=C1	Deterenol	Drugs	195.126	0.75
USAN01450	CC1=C(C)C(CC2=CNC=N2)=CC=C1	Detomidine	Drugs	186.116	2.936
USAN01451	CCOC(OCC)C(=O)OCC(=O)C1(O)CC(OC2CC(N)C(O)C(C)O2)C2=C(C1)C(O)=C1C(=O)C3=C(C(OC)=CC=C3)C(=O)C1=C2O	Detorubicin	Drugs	673.237	1.081
USAN01453	COC1=CC=CC(CCN(C)CCCC(C#N)(C(C)C)C2=CC(OC)=C(OC)C=C2)=C1	Devapamil	Drugs	424.273	4.727
USAN01455	CC1CC2C3CCC4=CC(=O)C=CC4(C)C3(F)C(O)CC2(C)C1(OC(=O)C1=CC=CO1)C(=O)COC(C)=O	Dexamethasone Acefurate	Drugs	528.216	3.68
USAN01399	CC1CC(=O)C=C2CCC3C4CC=CC4(C)CCC3C12C	Delanterone	Drugs	284.214	5.531
USAN01457	CC1CC2C3CCC4=CC(=O)C=CC4(C)C3(F)C(O)CC2(C)C1(O)C(=O)COP(O)(O)=O	Dexamethasone Phosphatic Acid	Drugs	472.166	1.074
USAN01458	C1CN2CC(N=C2S1)C1=CC=CC=C1	Dexamisole	Drugs	204.072	1.844
USAN01460	CN(C)CCC(C1=CC=C(Cl)C=C1)C1=CC=CC=N1	Dexchlorpheniramine	Drugs	274.124	3.148
USAN01461	CC(C)C1(O)CCN2CC3C4=C(CCC5=CC=CC(C2C1)=C35)C=CC=C4	Dexclamol	Drugs	347.225	4.546
USAN01463	CCOC(=O)C=C1SC(N2CCCCC2)C(=O)N1C	Dexetozoline	Drugs	284.119	2.922
USAN01464	CCNC(C)CC1=CC=CC(=C1)C(F)(F)F	Dexfenfluramine	Drugs	231.123	3.3
USAN01465	C1CN2C(CN=C2N1)C1=CC=CC=C1	Deximafen	Drugs	187.111	0.514
USAN01466	CC(C(O)=O)C1=CC=C(C=C1)N1CC2=C(C=CC=C2)C1=O	Dexindoproden	Drugs	281.105	2.743
USAN01469	CC(C1=CNC=N1)C1=C(C)C(C)=CC=C1	Dexmedetomidine	Drugs	200.131	3.105
USAN01470	C1OC(OC1C1CCCCN1)(C1=CC=CC=C1)C1=CC=CC=C1	Dexoxadrol	Drugs	309.173	3.677
USAN01400	CCOC(=O)C(CCC1=CC=CC=C1)NC(C)C(=O)N(CC(O)=O)C1CC2=C(C1)C=CC=C2	Delapril	Drugs	452.231	2.455
USAN01471	CC(C)(CO)C(O)C(=O)NCCCO	Dexpanthenol	Drugs	205.131	-1.648
USAN01472	CC(C)NCC(O)COC1=CC=CC2=C1C=CC=C2	Dexpropranolol	Drugs	259.157	2.753
USAN01473	CCC(=O)OC(CC1=CC=CC=C1)(C(=C)CN(C)C)C1=CC=CC=C1	Dexproxibutene	Drugs	337.204	5.126
USAN01474	CCN(CCCC(=O)C1CCCCC1)C(C)CC1=CC=C(OC)C=C1	Dexsecoverine	Drugs	345.267	5.372
USAN01475	CCOC(=O)C1(CCC=CC1N(C)C)C1=CC=CC=C1	Dextilidine	Drugs	273.173	3.756
USAN01476	NC1CC1C1=CC=CC=C1	Dextriferron	Drugs	133.089	1.478
USAN01478	CC(COC1=CC=CC=C1)NC(C)CC1=CC=CC=C1	Dextrofemine	Drugs	269.178	4.282
USAN01480	CC(CN1CCOCC1)C(C(=O)N1CCCC1)(C1=CC=CC=C1)C1=CC=CC=C1	Dextromoramide	Drugs	392.246	4.074
USAN01482	OCC1OC(O)C(O)C(O)C1O	Dextrose	Drugs	180.063	-2.213
USAN01483	NC(CC1=CC(I)=C(OC2=CC(I)=C(O)C(I)=C2)C(I)=C1)C(O)=O	Dextrothyroxinic Acid	Drugs	776.687	3.508
USAN01401	CN1CC(CC#N)CC2C1CC1=CNC3=CC=CC2=C13	Delergotrile	Drugs	265.158	2.176
USAN01484	NC1=CC2=C(N=CN2)C(=O)N1	Dezaguanine	Drugs	150.054	-0.836
USAN01485	CC12CCCCCC(CC3=CC=C(O)C=C13)C2N	Dezocine	Drugs	245.178	3.72
USAN01486	CC(=O)OC1=CC=CC2=C1C(=O)C1=C(OC(C)=O)C=C(C=C1C2=O)C(O)=O	Diacerein	Drugs	368.053	2.127
USAN01487	CC(=O)NC1=CC=C(OC(C)=O)C=C1	Diacetamate	Drugs	193.074	0.666
USAN01488	CC(C)NCC(O)COC1=C(C=C(NC(C)=O)C=C1)C(C)=O	Diacetolol	Drugs	308.174	0.652
USAN01489	CC(=O)NC1=CC=C(OCCOCCOC2=CC=C(NC(C)=O)C=C2)C=C1	Diamfenetide	Drugs	372.169	2.16
USAN01490	CCN(CC)CCOC1(CCN(CCNC2=CC=CC=C2)CC1)C1=CC=CC=C1	(Name???)	Drugs	395.294	4.769
USAN01492	CCN(CC)CCOC1=CC2=C(C=C1)N=C(S2)N(C)C	Diamthazole	Drugs	293.156	4.29
USAN01493	CNC(=O)C1=CC=C(Cl)C(=C1)S(=O)(=O)NC	Diapamide	Drugs	262.018	0.778
USAN01494	CCN(CC)CCNC(=O)C1=C(O)C2=C(OC1=O)C=CC=C2	Diarbarone	Drugs	304.142	3.167
USAN01402	CN(C)S(=O)(=O)C1=CC=C(N)C(=C1)C(=O)N1CCN(C)CC1	Delfantrine	Drugs	326.141	0.026
USAN01495	CC(C)C1=C(O)C=C(C)C(=C1)N=NC1=CC=C(C=C1)S(=O)(=O)C1=CC=C(C=C1)N=NC1=CC(C(C)C)=C(O)C=C1C	Diathymosulfone	Drugs	570.23	9.645
USAN01497	CNCC(O)C(O)C(O)C(O)CO	Meglumine	Drugs	195.111	-1.565
USAN01498	COC1=C(OC)C=C(CC2=C(N)N=C(N)N=C2)C=C1	Diaveridine	Drugs	260.127	1.339
USAN01499	CN1C2=C(C=C(Cl)C=C2)C(=NCC1=O)C1=CC=CC=C1	Diazepam	Drugs	284.072	2.961
USAN01500	CCOC(=O)NC1=C(N2CC2)C(=O)C(NC(=O)OCC)=C(N2CC2)C1=O	Diaziquone	Drugs	364.138	0.317
USAN01501	CC1=NC2=C(C=C(Cl)C=C2)S(=O)(=O)N1	Diazoxide	Drugs	229.992	1.201
USAN01502	NCC1CCC(N)C(OC2C(N)CC(N)C(OC3OC(CO)C(O)C(N)C3O)C2O)O1	Dibekacin	Drugs	451.264	-3.409
USAN01503	CN(CC1=CC=CC=C1)CC1=CC=CC=C1	Dibemethine	Drugs	211.136	3.744
USAN01504	CN(C)CCN1C2=C(C=CC=C2)N(C)C2=CC=CC=C2C1=O	Dibenzepin	Drugs	295.168	3.309
USAN01505	S1C2=CC=CC=C2C2=C1C=CC=C2	Dibenzothiophene	Drugs	184.035	4.556
USAN01403	CC(=O)OC1(CCC2C3C=C(Cl)C4=CC(=O)C=CC4(C)C3CCC12C)C(C)=O	Delmadinone Acetate	Drugs	402.16	4.152
USAN01506	NC(=N)C1=CC=C(OCCCOC2=CC=C(C=C2Br)C(N)=N)C(Br)=C1	Dibrompropamidine	Drugs	467.98	2.965
USAN01507	OC1=CC=C(Br)C=C1C(=O)NC1=CC=C(Br)C=C1	Dibromsalan	Drugs	368.9	5.381
USAN01509	CCCCOC1=NC2=C(C=CC=C2)C(=C1)C(=O)NCCN(CC)CC	Dibucaine	Drugs	343.226	5.354
USAN01510	CCCCOCC(O)COCCCC	Dibuprol	Drugs	204.173	2.225
USAN01511	CC(C)CN(CS(=O)(=O)O[Na])C1=C(C)N(C)N(C1=O)C1=CC=CC=C1	Dibupyrone	Drugs	375.123	1.01
USAN01512	CCN(CC)CCCCNC(=O)C1=CC=CC=C1OC(C)=O	Dibusadol	Drugs	306.194	1.862
USAN01513	CN1CCC2NC3=C(C=C(C)C=C3)C2C1	Dicarbine	Drugs	202.147	2.057
USAN01514	CCN(CC)CCOC(=O)N(C1=CC=CC=C1)C1=CC=CC=C1	Dicarfen	Drugs	312.184	4.65
USAN01515	CC(=O)OCC(=O)C1(O)CCC2C3CCC4=CC(=O)C=CC4(C)C3(Cl)C(Cl)CC12C	Dichlorisone Acetate	Drugs	454.131	3.473
USAN01516	CN1C(C2=CC(Cl)=C(Cl)C=C2)S(=O)(=O)CCC1=O	Dichlormezanone	Drugs	306.984	2.168
USAN01518	NC1=CC(=CC=C1O)[As](Cl)Cl	Dichlorophenarsine	Drugs	252.904	0.291
USAN01527	CCN(CC)CCNC(=O)C1=CC(Cl)=CC(Cl)=C1OC	Diclometide	Drugs	318.09	3.842
USAN01641	O=C(C(C1=CC=CC=C1)C1=CC=CC=C1)C1C(=O)C2=C(C=CC=C2)C1=O	Diphenadione	Drugs	340.11	3.538
USAN01528	OC(=O)C1=C(NC2=CC=CC(Cl)=C2Cl)N=CC=C1	Diclonixin	Drugs	281.996	5.289
USAN01529	OC(NC(=O)NC(O)C(Cl)(Cl)Cl)C(Cl)(Cl)Cl	Dicloralurea	Drugs	351.851	2.863
USAN01530	CC1=C(C(=O)NC2C3SC(C)(C)C(N3C2=O)C(O)=O)C(=NO1)C1=C(Cl)C=CC=C1Cl	Dicloxacillin	Drugs	469.027	2.981
USAN01533	CC1=CC(O)=C(C=C1CC1=C(C)C=C(O)C(=C1)S(O)(=O)=O)S(O)(=O)=O	Dicresulene	Drugs	388.029	-1.801
USAN01534	OC1=C(CC2=C(O)C3=C(OC2=O)C=CC=C3)C(=O)OC2=C1C=CC=C2	Dicumarol	Drugs	336.063	3.658
USAN01536	CC(C)COC(=O)C1OC=C(COC(=O)CC(C)C)C2CC(OC(C)=O)C3(CO3)C12	Didrovaltrate	Drugs	424.21	2.35
USAN01537	ClC1=C(Cl)C2(Cl)C3C4CC(C5OC45)C3C1(Cl)C2(Cl)Cl	Dieldrin	Drugs	377.871	4.736
USAN01539	CC12CCC3=C4CCC(=O)C=C4CCC3C1CCC2(O)CC#N	Dienogest	Drugs	311.189	2.125
USAN01540	CCC1(CC)COC(=O)NC1=O	Diethadione	Drugs	171.09	0.024
USAN01519	CC1=CC(O)=C(Cl)C(C)=C1Cl	Dichloroxylenol	Drugs	189.995	3.97
USAN01541	OCCNCCO	Diethanolamine	Drugs	105.079	-1.463
USAN01542	CCN(CC)CCN1C2=C(SC3=C1C=CC=C3)C=CC=C2	Diethazine	Drugs	298.15	5.149
USAN01543	CCOC(=O)C1=C(C=CC=C1)C(=O)OCC	Diethy Phthalate	Drugs	222.089	2.618
USAN01545	CCN(CC)C(C)C(=O)C1=CC=CC=C1	Diethylpropion	Drugs	205.147	2.85
USAN01548	CCN(CC)C(=O)C1=CC=CC(C)=C1	Diethyltoluamide	Drugs	191.131	2.164
USAN01549	CCN(CC)CCOC1=CC=C(C=C1)C(=O)CCC1=CC=CC=C1	Dietifen	Drugs	325.204	5.055
USAN01550	CCCCOCC(CN1C(=O)N(CC(COCCCC)OC(N)=O)C(=O)C(CC)(C1=O)C1=CC=CC=C1)OC(N)=O	Difebarbamate	Drugs	578.295	4.43
USAN01551	CN(C)C(C)(C)COC(=O)C(O)(C1=CC=CC=C1)C1=CC=CC=C1	Difemerine	Drugs	327.183	3.41
USAN01552	OCCN1CCCCC1C(C1=CC=CC=C1)C1=CC=CC=C1	Difemetorex	Drugs	295.194	4.331
USAN01553	CC(N(C)C)C(=O)NC1=CC(=NN1C1=CC=CC=C1)C1=CC=CC=C1	Difenamizole	Drugs	334.179	4.066
USAN01520	NS(=O)(=O)C1=CC(Cl)=C(Cl)C(=C1)S(N)(=O)=O	Dichlorphenamide	Drugs	303.915	0.241
USAN01554	ClC1=CC=C(C=C1)C(OCCN1CCOCC1)C1=CC=CC=C1	Difencloxazine	Drugs	331.134	4.162
USAN01555	O=C(ON1C(=O)CCC1=O)C1(CCN(CCC(C#N)(C2=CC=CC=C2)C2=CC=CC=C2)CC1)C1=CC=CC=C1	Difenoximide	Drugs	521.231	4.48
USAN01556	OC(=O)C1(CCN(CCC(C#N)(C2=CC=CC=C2)C2=CC=CC=C2)CC1)C1=CC=CC=C1	Difenoxin	Drugs	424.215	2.127
USAN01557	O[As](O)(=O)C1=CC=C(NCCNC2=CC=C(C=C2)[As](O)(O)=O)C=C1	Difetarsone	Drugs	459.96	-1.05
USAN01558	CC(C(O)C1=CC=CC=C1)N(C)CCOC(C1=CC=CC=C1)C1=CC=CC=C1	Difeterol	Drugs	375.22	4.916
USAN01560	CN1CCN(CC1)C1=CC2=C(C=C1F)C(=O)C(=CN2C1=CC=C(F)C=C1)C(O)=O	Difloxacin	Drugs	399.139	1.285
USAN01561	FC1=CC=C(C=C1)C(CCCN1CCN(CCNC2=CC=CC=C2)CC1)C1=CC=C(F)C=C1	Difluanine	Drugs	449.264	5.696
USAN01562	CC1CC2C3CC(F)C4=CC(=O)C=CC4(C)C3(F)C(O)CC2(C)C1C(=O)CO	Diflucortolone	Drugs	394.196	2.454
USAN01563	FC(F)S(=O)(=O)N([Na])C1=CC(=CC=C1)C(=O)C1=CC=CC=C1	Diflumidone Sodium	Drugs	333.025	2.192
USAN01564	OC(=O)C1=CC(=CC=C1O)C1=CC=C(F)C=C1F	Diflunisal	Drugs	250.044	4.397
USAN01521	COP(=O)(OC)OC=C(Cl)Cl	Dichlorvos	Drugs	219.946	1.789
USAN01566	O=C1N2CC3=C(C=CC=C3)C(=O)N2CC2=CC=CC=C12	Diftalone	Drugs	264.09	2.408
USAN01569	O=C(OCCN1CCCCC1)C1(CCCCC1)C1CCCCC1	Dihexyverine	Drugs	321.267	6.289
USAN01570	NN=C1NNC(=NN)C2=C1C=CC=C2	Dihydralazine	Drugs	190.097	-1.518
USAN01572	CNC1C(O)C(O)C(OC)OC1OC1C(OC2C(O)C(O)C(NC(N)=N)C(O)C2NC(N)=N)OC(C)C1(O)OC	Dihydrostreptomycin	Drugs	583.281	-2.941
USAN01574	NCC(=O)O[Al](O)O	Dihydroxyaluminum Aminoacetate	Drugs	135.011	-1.705
USAN01575	CC(C)N(CCC(C1=CC=CC=C1)C1=CC=CC=C1)C(C)C	Diisopromine	Drugs	295.23	5.608
USAN01576	CC(O)CNCC(C)O	Diisopropanolamine	Drugs	133.11	-0.845
USAN01577	COC1=CC(=CC(OC)=C1OC)C(=O)OCCCN1CCCN(CCCOC(=O)C2=CC(OC)=C(OC)C(OC)=C2)CC1	Dilazep	Drugs	604.3	3.536
USAN01578	CC(CCC1=CC=CC=C1)NCC(O)C1=CC=C(O)C(=C1)C(N)=O	Dilevalol	Drugs	328.179	2.5
USAN01579	COC1=CC=C(C(=O)C=CC2=CC=NC=C2)C(OC)=C1	Dilmefone	Drugs	269.105	2.375
USAN01522	CC(C)OC(=O)C1CC2=CC(=O)CCC2(C)C2CCC3(C)C(CCC33CCC(=O)O3)C12	Dicirenone	Drugs	428.256	3.027
USAN01580	CN(C(=O)C(Cl)Cl)C1=CC=C(O)C=C1	Diloxanide	Drugs	233.001	1.766
USAN01581	COC1=CC=C(C=C1)C1SC2=C(C=CC=C2)N(CCN(C)C)C(=O)C1OC(C)=O	Diltiazem	Drugs	414.161	3.647
USAN01582	CN(C)C1=CC=C(CN2C=NC3=C2C(=O)N(C)C(=O)N3C)C=C1	Dimabefylline	Drugs	313.154	1.643
USAN01583	CN(C)C1(C)C2CCC(C2)C1(C)C	Dimecamine	Drugs	181.183	3.361
USAN01585	COC1=CC=C(C(C)=CC(O)=O)C(OC)=C1	Dimecrotic Acid	Drugs	222.089	2.646
USAN01586	CN(C)C1CC(C2=C1C=CC=C2)C1=CC=CC=C1	Dimefadane	Drugs	237.152	3.948
USAN01587	COC1=C(CN(C)C)C2=C(C=C1)C(=O)C(C)=C(O2)C1=CC=CC=C1	Dimefline	Drugs	323.152	3.62
USAN01588	CN1CCC(C)(CN2C3=CC=CC=C3SC3=C2C=CC=C3)C1	Dimelazine	Drugs	310.15	5.028
USAN01589	CN1CCC23CCCCC2C1CC1=C3C=C(C)C=C1	Dimemorfan	Drugs	255.199	4.695
USAN01590	CN(C)CCOC(C1=CC=CC=C1)C1=CC=CC=C1	2-(Diphenylmethoxy)-N,N-Dimethylethanamine	Drugs	255.162	3.452
USAN01523	ClC1=CC=C(C=C1)C(C#N)C1=C(Cl)C=C(C=C1Cl)N1N=CC(=O)NC1=O	Diclazuril	Drugs	405.979	4.981
USAN01591	CN1C2=C(NC(Cl)=N2)C(=O)N(C)C1=O	1H-Purine-2,6-dione,8-chloro-3,7-dihydro-1,3-dimethyl-,compd.	Drugs	214.026	0.779
USAN01592	CCOC(C(=O)OCCN(C)C)(C1=CC=CC=C1)C1=CC=CC=C1	Dimenoxadol	Drugs	327.183	3.675
USAN01594	CC(O)CN(C)C	Dimepranol	Drugs	103.1	-0.088
USAN01595	CC1CC2C3CC(C)C4=CC(O)CCC4(C)C3CCC2(C)C1C(C)=O	Dimepregnen	Drugs	344.272	5.065
USAN01596	COC1=CC=C2OC3=C(C=CC=C3)C(=CCCN(C)C)C2=C1	Dimeprozan	Drugs	295.157	4.392
USAN01598	[Na]OS(=O)(=O)CCSSCCS(=O)(=O)O[Na]	Dimesna	Drugs	325.9	-1.221
USAN01599	CC1CC2C3CCC4=CC(=O)C=CC4(C)C3(F)C(O)CC2(C)C1(C)C(=O)CO	Dimesone	Drugs	390.221	2.93
USAN01600	CN(C)CCCN1C2=CC=CC=C2C(C)(C)C2=C1C=CC=C2	Dimetacrine	Drugs	294.21	5.666
USAN01601	CC(CC1=CC=CC=C1)N(C)C	Dimetamfetamine	Drugs	163.136	2.424
USAN01602	CC1(C)OC(=O)NC1=O	Dimethadione	Drugs	129.043	0.507
USAN01524	OC(=O)CC1=C(NC2=C(Cl)C=CC=C2Cl)C=CC=C1	Diclofenac Acid	Drugs	295.017	4.726
USAN01603	CN(C)CCN1C=NC2=C1C(=O)N(C)C(=O)N2C	Dimethazan	Drugs	251.138	0.08
USAN01604	CC(C1=C(CCN(C)C)CC2=C1C=CC=C2)C1=NC=CC=C1	Dimethindene	Drugs	292.194	3.533
USAN01605	[Na]OS(=O)(=O)C(I)I	Dimethiodal Sodium	Drugs	369.763	0.903
USAN01606	CCCCC1=CC2=C(C=CC=C2)C(OCCN(C)C)=N1	Dimethisoquin	Drugs	272.189	4.824
USAN01607	CC#CC1(O)CCC2C3CC(C)C4=CC(=O)CCC4(C)C3CCC12C	Dimethisterone	Drugs	340.24	4.337
USAN01608	COCCCN1CCN(CC1)C1=CC=CC=C1OC	Dimetholizine	Drugs	264.184	2.572
USAN01609	CN(C)CCOCCOC(=O)N1C2=CC=CC=C2SC2=C1C=CC=C2	Dimethoxanate	Drugs	358.135	4.213
USAN01614	CNCC(O)C1=CC(OC)=C(O)C(OC)=C1	Dimetofrine	Drugs	227.116	-0.455
USAN01615	CN1C(C)=NC=C1N(=O)=O	Dimetridazole	Drugs	141.054	0.250623
USAN01616	NC(=N)C1=CC=C(NN=NC2=CC=C(C=C2)C(N)=N)C=C1	Diminazene	Drugs	281.139	0.905
USAN01525	COC1=CC2=C(C=C1)C(CN(C)C2)C1=CC=C(Cl)C(Cl)=C1	Diclofensine	Drugs	321.069	5.044
USAN01617	CCC(N)CC1=C(OC)C=C(C)C(OC)=C1	Dimoxamine	Drugs	223.157	2.778
USAN01618	CCOCC(C)(C)C(O)C=CC1C(O)CC(=O)C1CC=CCCCC(O)=O	Dimoxaprost	Drugs	382.236	1.034
USAN01619	CCOC1=CC=C(CC2=C3C=C(OC)C(OC)=CC3=CC(C)=N2)C=C1OC	Dimoxyline	Drugs	367.178	4.81
USAN01620	CCOP(=S)(OCC)OC1=CC(C)=NC(=N1)C(C)C	Dimpylate	Drugs	304.101	3.528
USAN01621	NC1=CC=C(C=C1)C(=O)NC1=C(N)C=CC=C1	Dinaline	Drugs	227.106	0.516
USAN01622	CN(C(=O)CNCC(C)=C)C1=CC=C(Cl)C=C1C(=O)C1=CC=CC=C1	Dinazafone	Drugs	356.129	3.796
USAN01623	CN1C2=C(N(CC(COC(=O)C3=CC=CN=C3)OC(=O)C3=CC=CN=C3)C=N2)C(=O)N(C)C1=O	Diniprofylline	Drugs	464.144	0.686
USAN01624	CC1=C(C=C(C=C1C(N)=O)N(=O)=O)N(=O)=O	Dinitolmide	Drugs	225.039	1.2258
USAN01625	CCCCCC(O)C=CC1C(O)CC(O)C1CC=CCCCC(O)=O	Dinoprost	Drugs	354.241	2.271
USAN01627	O=N(=O)C1=CC=CC(=C1)S(=O)(=O)NCCNS(=O)(=O)C1=CC(=CC=C1)N(=O)=O	Dinsed	Drugs	430.025	1.252
USAN01526	CCN(CC)CCON=C(C1=CC=CO1)C1=CC=C(OC)C(Cl)=C1Cl	Diclofurime	Drugs	384.101	5.979
USAN01628	COC1=C(O)C=C(C=C1)C1=CC(=O)C2=C(O1)C=C(OC1OC(COC3OC(C)C(O)C(O)C3O)C(O)C(O)C1O)C=C2O	Diosmin	Drugs	608.174	0.228
USAN01629	NC(CC1=CC(I)=C(O)C(I)=C1)C(O)=O	Diotyrosine I 125	Drugs	432.867	-0.276
USAN01630	CC(C)(C)NCC(O)COCC1COC2=C(O1)C=CC=C2	Dioxadilol	Drugs	295.178	1.965
USAN01632	CCCCCCCCCC1(C)OCC(COC(N)=O)O1	Dioxamate	Drugs	287.21	4.53
USAN01633	CCOC(=O)C(CCN1CCOCC1)(C1=CC=CC=C1)C1=CC=CC=C1	Dioxaphetyl Butyrate	Drugs	353.199	4.106
USAN01634	CCOP(=S)(OCC)SC1OCCOC1SP(=S)(OCC)OCC	Dioxation	Drugs	456.009	4.007
USAN01635	CCNC(C)C(O)C1=CC(O)=C(O)C=C1	Dioxethedrin	Drugs	211.121	0.153
USAN01636	CNC(C)C(O)C1=CC(O)=C(O)C=C1	Dioxifedrine	Drugs	197.105	-0.376
USAN01637	COC1=CC=C(C(=O)C2=CC=CC=C2O)C(O)=C1	Dioxybenzone	Drugs	244.074	3.488
USAN01639	O=C(NC1=CC=CC=C1)OCC(CN1CCCCC1)OC(=O)NC1=CC=CC=C1	Diperodon	Drugs	397.2	4.296
USAN01642	NC(=O)OC1=CC=C(CC2=CC=CC=C2)C=C1	Diphenan	Drugs	227.095	3.162
USAN01653	CCCC(N)(CCC)CCC	Diprobutine	Drugs	157.183	3.747
USAN01770	CCCC(=O)NC1=CC(C2=CC=NO2)=C(OCC(O)CNCCC2=CC(OC)=C(OC)C=C2)C=C1	Ecastolol	Drugs	483.237	2.396
USAN01654	CCCN(CCC)CCSC(=O)C(C1=CC=CC=C1)C1=CC=CC=C1	Diprofene	Drugs	355.197	6.16
USAN01655	CC1(C)OC2C3OC(C)(C)OCC3OC2(O1)C(O)=O	Diprogulic Acid	Drugs	274.105	0.469
USAN01656	CCC(=O)OC1C(C)OC(CC1OC)OC1C(C)C(OC2OC(C)CC(C2O)N(C)C)C(C)CC2(CO2)C(=O)C(C)C(OC(=O)CC)C(C)C(C)OC(=O)C1C	Diproleandomycin	Drugs	799.472	4.405
USAN01657	CC1=NC2=C(C=CC=C2)C(=O)N1CCOCO	Diproqualone	Drugs	234.1	0.698
USAN01658	CCOC1=CC=C(CC2=NCCC3=C2C=C(OC(C)C)C(OC(C)C)=C3)C=C1OCC	Diproteverine	Drugs	425.257	5.897
USAN01659	CCC(=O)NC1=C(I)C(C(O)=O)=C(I)C(NC(=O)CC)=C1I	Diprotrizoatic Acid	Drugs	641.801	1.818
USAN01660	CC1OC2=C(C=C(Cl)C=C2)N(CC(O)CO)C1=O	Diproxadol	Drugs	271.061	1.634
USAN01662	O=N1=CC=CC=C1SSC1=N(=O)C=CC=C1	Dipyrithione	Drugs	252.003	0.866911
USAN01663	CC(=O)OC1=C(OC(C)=O)C(=CC=C1)C(O)=O	Dipyrocetyl	Drugs	238.048	0.095
USAN01644	OC(CCCN1CCCCC1)(C1=CC=CC=C1)C1=CC=CC=C1	Diphenidol	Drugs	309.209	4.067
USAN01664	CN(CS(=O)(=O)O[Na])C1=C(C)N(C)N(C1=O)C1=CC=CC=C1	Dipyrone	Drugs	333.076	-0.447
USAN01667	CC(C)N(CCC(CCN1CCCCC1)(C(N)=O)C1=C(Cl)C=CC=C1)C(C)C	Disobutamide	Drugs	407.27	5.063
USAN01668	CC(C)C1=CC=CC(C(C)C)=C1NC(=O)CN(CC(O)=O)CC(O)=O	Disofenin	Drugs	350.184	1.1
USAN01669	COC1OC(OC2CCC3(C)C4CCC5(C)C(CC6OC7(CCC(C)CO7)C(C)C56)C4CC=C3C2)C(O)C(O)C1O	Disogluside	Drugs	576.366	5.864
USAN01671	CC1=NOC(CCCCCCCOC2=CC=C(C=C2)C2=NCCO2)=C1	Disoxaril	Drugs	342.194	4.972
USAN01673	CN(C)S(=O)(=O)NC1CC2C(CC3=CNC4=CC=CC2=C34)N(C)C1	Disulergine	Drugs	348.162	1.707
USAN01674	CC1=CC(Cl)=C(C=C1S(N)(=O)=O)S(N)(=O)=O	Disulfamide	Drugs	283.969	0.108
USAN01676	CCSC1=C(C)C(CS(=O)C2=NC3=C(N2)C=CC=C3)=NC=C1	Disuprazole	Drugs	331.081	2.653
USAN01677	OCCN(CCO)C1=NC(=C(O1)C1=CC=CC=C1)C1=CC=CC=C1	Ditazole	Drugs	324.147	2.65
USAN01680	CCN(CC)C(=S)S[Na]	Ditiocarb Sodium	Drugs	171.015	1.609
USAN01645	CCOC(=O)C1(CCN(CCC(C#N)(C2=CC=CC=C2)C2=CC=CC=C2)CC1)C1=CC=CC=C1	Diphenoxylate	Drugs	452.246	5.331
USAN01681	ClCCNC(=O)N(CCSSCCNC(=O)N(CCCl)N=O)N=O	Ditiomustine	Drugs	420.021	2.602
USAN01682	CCCN(CCC)S(=O)(=O)C1=CC=C(C)C=C1	Ditolamide	Drugs	255.129	3.952
USAN01683	CCSC(=O)C1=CC(=CC=C1)C(=O)SCC	Ditophal	Drugs	254.044	3.666
USAN01684	CC(C)(C)CNC(O)C1=CC(OC(=O)C(C)(C)C)=CC(OC(=O)C(C)(C)C)=C1	Divabuterol	Drugs	393.252	4.074
USAN01686	CCOC(=S)SSC(=S)COC	Dixanthogen	Drugs	241.956	2.032
USAN01687	COC1=CC=C(C=C1)C1=NN(CC2CC2)C(=O)N=C1C1=CC=C(OC)C=C1	Dizatrifone	Drugs	363.158	3.026
USAN01688	CC12NC(CC3=CC=CC=C13)C1=C2C=CC=C1	Dizocilpine	Drugs	221.12	3.088
USAN01689	CCCCOC1=CC(N)=C(Cl)C=C1C(=O)NC1CCN(CC2OCCO2)CC1	Dobupride	Drugs	411.192	2.052
USAN01691	CCOC(=O)OC1=C(OC(=O)OCC)C=C(CCNC(=O)C(CCSC)NC(C)=O)C=C1	Docarpamine	Drugs	470.172	0.045
USAN01692	ClC1=CC(Cl)=C(C=C1)C1(CN2C=CN=C2)OCC(COC2=CC=C(C=C2)C2=CC=CC=C2)O1	Doconazole	Drugs	480.101	6.383
USAN01646	CN1CCC(CC1)OC(C1=CC=CC=C1)C1=CC=CC=C1	Diphenylpyraline	Drugs	281.178	3.206
USAN01693	CCCCC(CC)COC(=O)CC(C(=O)OCC(CC)CCCC)S(O)(=O)=O	Docusatic Acid	Drugs	422.234	5.464
USAN01696	NC(=O)CN1C(=O)C(C2=C1C=CC=C2)C1=CC=CC=C1	Doliracetam	Drugs	266.106	1.539
USAN01697	COC1=CC(C)=C(OC)C(C)=C1CC1=NCCN1	Domazoline	Drugs	248.152	3.608
USAN01698	OCC1COC(CI)O1	Domiodol	Drugs	243.96	0.326
USAN01700	COC1CC(=O)NN=C1C1=CC=C(OC)C(OC)=C1	Domiphen	Drugs	264.111	1.286
USAN01701	CCCC(=O)OC1(CCCC2C3CCC4=CC(=O)C=CC4(C)C3C(O)CC12C)C(C)=O	Domoprednate	Drugs	428.256	3.583
USAN01702	NN(CC1COC2=C(O1)C=CC=C2)CC1=CC=CC=C1	Domoxin	Drugs	270.137	2.6
USAN01703	ClC1=CC2=C(C=C1)N(C1CCN(CCCN3C(=O)NC4=C3C=CC=C4)CC1)C(=O)N2	Domperidone	Drugs	425.162	4.268
USAN01704	CN(C)CC1=CC=C(CSCCNC2=NC(=O)C(CC3=CC(=O)NC=C3)=CN2)O1	Donetidine	Drugs	415.168	-0.051
USAN01705	OC1=CC=C(CCNC(=O)C23CC4CC(CC(C4)C2)C3)C=C1O	Dopamantine	Drugs	315.183	2.414
USAN01647	CC(=O)NNC(=O)CC(O)(C1=CC=CC=C1)C1=CC=CC=C1	Diphoxazide	Drugs	298.132	1.166
USAN01707	OC1=CC=C(CCNCCCCCCNCCC2=CC=CC=C2)C=C1O	Dopexamine	Drugs	356.246	3.316
USAN01708	CC#CC1(CCCCC1)OCC(COCC(C)C)N1CCCC1	Dopropidil	Drugs	321.267	5.294
USAN01709	OC(=O)C1=CC2=C(C=C1)N=C1C=CC=CN1C2=O	Doqualast	Drugs	240.053	1.957
USAN01710	CN1CCC2=C(C1)C1=C(C=CC(Cl)=C1)N2CCC1=CN=C(C)C=C1	Dorastine	Drugs	339.15	4.351
USAN01711	CCC(NC(=O)C1CCCN1)(C(=O)NCC(N)=O)C1=CC=CC=C1	Doreptide	Drugs	332.185	0.433
USAN01712	CC(=CC1=CC=C(CO)C=C1)C1=CC=C2C(=C1)C(C)(C)C(O)CC2(C)C	Doretinel	Drugs	350.225	5.506
USAN01713	CCCCCCCCCCCCCC=CC(O)C(CO)NC(=O)C1CC2C(CC3=CNC4=C3C2=CC=C4)N(C)C1	Dosergoside	Drugs	551.409	8.564
USAN01714	C(CN1CCN(CC1)C(C1=CC=CC=C1)C1=CC=CC=C1)CC1(OCCO1)C1=CC=CC=C1	Dotarizine	Drugs	442.262	5.612
USAN01716	CN(C)CCC=C1C2=CC=CC=C2SCC2=C1C=CC=C2	Dothiepin	Drugs	295.139	4.532
USAN01718	CN(CCC1C2=CC=CC=C2OCC2=C1C=CC=C2)CC(O)COC1=CC=CC=C1	Doxaminol	Drugs	403.215	5.184
USAN01648	CCC(=O)C(CC(C)N1CCCCC1)(C1=CC=CC=C1)C1=CC=CC=C1	Dipipanone	Drugs	349.241	5.297
USAN01720	CCCCCC(C)(O)C=CC1CCC(=O)C1CCCCCCC(O)=O	Doxaprost	Drugs	352.261	4.183
USAN01721	COC1=CC2=C(C=C1OC)C(N)=NC(=N2)N1CCN(CC1)C(=O)C1COC2=CC=CC=C2O1	Doxazosin	Drugs	451.186	3.532
USAN01722	OCCN1C2=C(C=C(Cl)C=C2)C(=NC(O)C1=O)C1=CC=CC=C1F	Doxefazepam	Drugs	348.068	1.585
USAN01723	O=C1NCNC1(C1=CC=CC=C1)C1=CC=CC=C1	Doxeniton	Drugs	238.111	1.802
USAN01725	CC1CC2C3CCC4=CC(=O)C=CC4(C)C3(F)C(O)CC2(C)C1(O)C(C)=O	Doxibetasol	Drugs	376.205	2.311
USAN01726	CC1OC(C(O)C1O)N1C=C(F)C(=O)NC1=O	Doxifluridine	Drugs	246.065	-1.188
USAN01727	CN1C2=C(N(CC3OCCO3)C=N2)C(=O)N(C)C1=O	Doxofylline	Drugs	266.102	-0.416
USAN01729	CN(C)C(C1COCOC1)C1=CN=CC=C1	Doxpixomine	Drugs	222.137	-0.769
USAN01732	COC1=C(OC)C=C(CCNCC(O)COC2=NNC(C=C2)=NN=C(C)C)C=C1	Dramedilol	Drugs	403.222	0.302
USAN01733	COC1=CC2=C(C=C1)C=C(N(C)C2=O)C1=CC=C(OCC(O)CNC(C)(C)C)C=C1	Draquinolol	Drugs	410.221	3.412
USAN01649	O=C(OCCN1CCCCC1)C(N1CCCCC1)C1=CC=CC=C1	Dipiproverine	Drugs	330.231	4.564
USAN01734	CC1=N(=O)C2=C(C=CC=C2)N(=O)=C1C(=O)NN	Drazidox	Drugs	234.075	-1.43296
USAN01735	COC(=O)NC1=NC2=C(N1)C=CC(SC1CCCCC1)=C2	Dribendazole	Drugs	305.12	4.434
USAN01736	NC=C1CC2=C(C=CC=C2)C1=O	Drinidene	Drugs	159.068	1.334
USAN01737	CC(C)NCC(O)CC(C1=CC=CC=C1)C1=CC=CC=C1	Drobuline	Drugs	283.194	3.541
USAN01738	CC1(C)OC2CC3C4CCC5CC(=O)CCC5(C)C4(F)C(O)CC3(C)C2(O1)C(=O)CO	Drocinonide	Drugs	438.242	2.817
USAN01741	CCN(CC)CCOC(=O)C(C1CCCCC1)C1=CC=CC=C1	Drofenine	Drugs	317.235	5.607
USAN01742	CCC(=C(C1=CC=C(OCCN(C)C)C=C1)C1=CC(O)=CC=C1)C1=CC=CC=C1	Droloxifene	Drugs	387.22	6.151
USAN01743	CC1=CC(N2N=C3C=CC=CC3=N2)=C(O)C=C1	Drometrizole	Drugs	225.09	4.449
USAN01745	CCCCCC1=CC2=C(C3C=C(C)CCC3C(C)(C)O2)C(O)=C1	Dronabinol	Drugs	314.225	7.238
USAN01746	CN1C(C)(C)CC=CC1(C)C	Dropempine	Drugs	153.152	3.173
USAN01650	CNCC(O)C1=CC=C(OC(=O)C(C)(C)C)C(OC(=O)C(C)(C)C)=C1	Dipivefrin	Drugs	351.205	1.571
USAN01747	FC1=CC=C(C=C1)C(=O)CCCN1CCC(=CC1)N1C(=O)NC2=C1C=CC=C2	Droperidol	Drugs	379.17	3.056
USAN01748	CC(CC1CCCCC1)NCCC(C1=CC=CC=C1)C1=CC=CC=C1	Droprenilamine	Drugs	335.261	6.884
USAN01749	OCC(O)CN1CCN(CC1)C1=CC=CC=C1	Dropropizine	Drugs	236.152	1.335
USAN01750	CCOC1=CC=C(C=C2NCCC3=C2C=C(OCC)C(OCC)=C3)C=C1OCC	Drotaverine	Drugs	397.225	5.23
USAN01751	COC1=CC=C2CC3N(C)CCC4(CC(O)CCC34O)C2=C1OC	Drotebanol	Drugs	333.194	0.432
USAN01752	CCN1C=C(C(O)=O)C(=O)C2=CC3=C(CCO3)C=C12	Droxacinic Acid	Drugs	259.084	1.893
USAN01753	CC1=CC=CC(C)=C1NC(=O)C1CCCCN1CCO	Droxicainide	Drugs	276.184	1.453
USAN01754	CN1C2=C(OC(=O)N(C2=O)C2=NC=CC=C2)C2=C(C=CC=C2)S1(=O)=O	Droxicam	Drugs	357.042	0.195
USAN01755	NC(C(O)C1=CC=C(O)C(O)=C1)C(O)=O	Droxidopa	Drugs	213.064	-2.484
USAN01756	CCC(=O)C1(CCN(CCOCCO)CC1)C1=CC=CC=C1	Droxypropine	Drugs	305.199	1.36
USAN01651	CCC(C)(C)NCC(O)COC1=C(C=CC=C1)C(=O)CCC1=CC=CC=C1	Diprafenone	Drugs	369.23	4.344
USAN01757	CC(C)(OC1=CC=C(Cl)C=C1)C(=O)OC1=CC=C(Cl)C=C1	Dulofibrate	Drugs	324.032	5.253
USAN01758	CN(C(=O)CN(CCO)CCO)C1=C(C=C(Cl)C=C1)C(=O)C1=CC=CC=C1Cl	Dulozafone	Drugs	424.096	2.878
USAN01759	COC1=CC=C(C=C1)C(=O)C1=C(C)N(CC(O)=O)C2=C1C=CC(OC)=C2	Duometacin	Drugs	353.126	3.763
USAN01760	FC1=CC=C(C=C1)C(=O)C1CCN(CCCN2C3=CC(=CC=C3SC3=C2C=CC=C3)C(F)(F)F)CC1	Duoperone	Drugs	514.17	7.142
USAN01761	O=C(CN1CCCC1=O)NNC(=O)CN1CCCC1=O	Dupracetam	Drugs	282.133	-0.966
USAN01764	CCCCCCCCCCCCCCCCCCN(C)C	Dymanthine	Drugs	297.34	9.011
USAN01766	CC(C)(C)C1=CC=C(C=C1)C(=O)CCCN1CCC(CC1)OC(C1=CC=CC=C1)C1=CC=CC=C1	Ebastine	Drugs	469.298	6.941
USAN01767	CS(=O)(=O)CCC(N)C(=O)NC(CCC(O)=O)C(=O)NC(CC1=CNC=N1)C(=O)NC(CC1=CC=CC=C1)C(=O)NC(CCCCN)C(=O)NC(CC1=CC=CC=C1)C(=O)NCCCCCCCCN	Ebiratide	Drugs	995.526	-4.565
USAN01768	NC(N)=NC1=NC(CSCCNC=NS(=O)(=O)C2=CC=C(Br)C=C2)=CS1	Ebrotidine	Drugs	475.976	1.91
[truncated: 21,035 more rows]
